# Supplementary material for: Lactate is an energy substrate for rodent cortical neurons and enhances their firing activity
Source: eLife. 2021 Nov 12;10:e71424. doi: 10.7554/eLife.71424 (PMC8651295; doi:10.7554/eLife.71424)
Supplement: Figure 1—source data 1. [file elife-71424-fig1-data1.xls]

## Sheet: Feuil1
Cell Id	Temperature	Layer	Digitized layer	IR morphology	Area (µm2)	Major axis (µm)	Minor Axis (µm)	Elongation	Perimeter (µm)	Roundness	RMP (mV)	Rin (MW)	tIC (ms)	Cm (pF)	DG sag (%)	Rheobase (pA)	1st spike delay (ms)	mthreshold (Hz/s)	Cthreshold (Hz)	Hump (mV)	Asat (Hz)	tsat (ms)	Csat (Hz)	msat (Hz/s)	A1 (mV)	AHP1f (mV)	ADP1 (mV)	AHP1s (mV)	TAHP1f (ms)	TADP1 (ms)	TAHP1s (ms)	D1 (ms)	A2 (mV)	AHP2f (mV)	ADP2 (mV)	AHP2s (mV)	TAHP2f (ms)	TADP2 (ms)	TAHP2s (ms)	D2 (ms)	Amp. Red.	Dur. Inc.	Intron Sst	Cell group	Cell type	Slc17a7	Gad2	Gad1	Nos1
FP070	33.8	II-III	2.5	Pyramidal	339.512	51.0984	20.0028	2.55456	130.076	3.96575	-81.0317	153.927	19.2525	125.076	0.130476	89.6577	116.781	-3.28891	3.97484	15.6067	117.765	10.3869	56.3917	-35.3197	95.999	-11.438	0	-13.547	15.43	0	41.6	0.97	94.627	-10.791	0	-15.527	9.57	0	43.88	1.03	0.0142918	0.0618557	n.d.	Glu	RS	1	0	0	0
FP067	34.1	II-III	2.5	Pyramidal	266.826	31.7248	15.2511	2.08016	77.5545	1.79381	-87.0464	122.92	18.126	147.462	0.0813084	109.46	149.002	-1.51177	4.75453	16.5405	121.732	9.24298	52.6355	-29.2664	93.361	-2.623	0	-14.972	6.52	0	66.2	1.09	93.026	-6.054	0	-14.896	10.25	0	63.19	1.13	0.00358822	0.0366972	n.d.	Glu	RS	1	0	0	0
FP075	33.4	II-III	2.5	Pyramidal	280.881	42.6124	20.8523	2.04354	111.187	3.50247	-91.0121	226.024	19.1655	84.7941	0.0745661	69.5648	238.683	-2.69105	6.63764	14.8376	114.592	16.4448	59.4903	-23.8017	99.444	-7.314	0	-16.382	4.55	0	34.65	1.22	99.413	-5.536	0	-16.209	4.93	0	49.91	1.24	0.000311733	0.0163934	n.d.	Glu	RS	1	0	0	0
FP066	34	II-III	2.5	Pyramidal	235.155	26.644	16.4044	1.6242	73.7759	1.84189	-86.0415	190.109	23.9777	126.126	0.0687361	89.4151	167.302	0.140334	3.77297	10.3516	109.108	15.3429	51.1948	-23.9732	91.364	-4.345	0	-13.909	7.07	0	56.18	1.06	91.176	-3.087	0	-14.672	5.23	0	66.18	1.08	0.0020577	0.0188679	n.d.	Glu	RS	1	0	0	0
FP072	33.7	II-III	2.5	Pyramidal	281.882	55.3261	14.9086	3.71102	126.942	4.54918	-82.3268	178.859	19.4973	109.009	0.0716113	69.533	224.703	-32.2269	12.1413	16.3818	107.134	10.5492	64.5732	-35.6387	97.226	-8.34	0	-11.746	7.41	0	17.18	1.08	96.851	-6.134	0	-13.433	5.9	0	25.04	1.16	0.00385699	0.0740741	1	Glu	RS	1	0	0	0
FP063	33.9	II-III	2.5	Pyramidal	184.757	27.6832	14.7641	1.87503	70.0421	2.11304	-80.0366	137.3	16.0711	117.051	0.0259019	69.3772	162.082	-2.19697	6.09069	20.0348	126.232	14.6065	66.0598	-41.9554	94.3	-7.27	0	-12.02	6.5	0	40.85	0.95	93.36	-7.33	0	-11.68	6.91	0	47.92	0.97	0.00996819	0.0210526	n.d.	Glu	RS	1	0	0	0
FP069	33.4	II-III	2.5	Pyramidal	301.983	47.0864	15.6325	3.01209	111.174	3.25698	-96.0121	315.93	36.5108	115.566	0.0300284	50.1268	166.222	-0.988052	4.32491	9.00879	101.966	10.6996	56.4287	-32.5641	96.952	-5.932	0	-16.967	4.88	0	53.11	0.99	95.95	-5.715	0	-17.23	4.85	0	40.69	1.01	0.010335	0.020202	n.d.	Glu	RS	1	0	0	0
FP068	31.8	II-III	2.5	Pyramidal	247.987	35.8299	14.886	2.40695	88.1487	2.49341	-96.9336	306	33.6785	110.061	0	69.3061	184.942	-5.06923	6.09033	2.99683	89.913	11.3996	60.3744	-25.6516	93.678	-5.139	0	-16.338	4.72	0	42.45	1.21	96.338	-3.412	0	-19.622	4.93	0	41.8	1.3	-0.0283951	0.0743802	n.d.	Glu	RS	1	0	0	0
FP059	32.5	II-III	2.5	Pyramidal	158.872	25.3848	17.4298	1.4564	72.6276	2.64208	-95.9679	218.94	21.0215	96.0148	0.02957	69.2554	127.862	-0.0869739	4.57119	17.2241	102.754	9.17409	60.1903	-40.7425	105.946	-7.336	0	-14.299	4.34	0	35.18	0.96	103.906	-5.261	0	-16.401	3.33	0	33.06	1.02	0.0192551	0.0625	n.d.	Glu	RS	1	0	0	0
BC217	34	I-II	1.5	Pyramidal	351.009	35.6161	24.6736	1.44349	112.955	2.89257	-98.0415	120	17.5393	146.161	0.0341961	129.404	143.462	-2.33155	5.06354	2.72217	67.6705	11.6502	45.462	-14.7551	95.298	-9.817	0	-20.284	4.44	0	59.37	0.92	94.989	-8.757	0	-20.966	4.67	0	59.95	0.95	0.00324246	0.0326087	0	Glu	RS	1	0	0	0
FP058	32.6	II-III	2.5	Pyramidal	326.644	37.993	19.5317	1.94519	98.8213	2.37912	-82.4728	94.48	17.8824	189.272	0.208079	149.268	98.88	0.877365	4.20761	17.0654	169.166	11.2261	72.0636	-38.64	80.928	-9.338	0	-22.778	5.46	0	51.82	1.02	81.407	-10.541	0	-24.292	6.66	0	49.58	1.02	-0.00591884	0	n.d.	Glu	RS	1	0	1	0
FP061	33.7	II-III	2.5	Pyramidal	220.287	27.866	14.2101	1.961	68.6327	1.70162	-84.0268	118.9	15.1136	127.112	0.0614191	119.381	131.542	-3.42934	4.38642	21.1731	120.875	12.1613	50.3814	-28.4349	94.072	-5.048	0	-12.146	5.75	0	43.92	0.97	94.018	-2.422	0	-13.043	4.76	0	56.3	1.06	0.000574028	0.0927835	n.d.	Glu	RS	0	1	0	0
FP060	33.4	II-III	2.5	Pyramidal	211.013	33.0008	14.3868	2.29382	78.6487	2.33272	-88.0121	159.525	20.0305	125.563	0.0869274	99.226	123.682	-2.23584	5.72319	18.2251	125.515	10.6775	51.8609	-33.2851	95.421	-3.906	0	-14.033	3.5	0	45.04	0.93	94.858	-3.731	0	-14.532	4.56	0	51.41	0.96	0.00590017	0.0322581	n.d.	Glu	RS	1	0	0	0
BC212	33.7	II-III	2.5	Pyramidal	194.659	25.3455	11.515	2.20109	77.7214	2.46944	-83.0268	165.926	17.4216	104.996	0.17902	69.5758	138.622	-4.29237	7.61633	5.82886	84.0987	11.2199	47.8588	-30.2037	96.074	-9.686	0	-17.572	3.92	0	26.79	0.87	94.243	-9.687	0	-18.042	4.19	0	25.41	0.9	0.0190582	0.0344828	0	Glu	RS	1	0	0	0
AK132	23	III	3	Fusiform	180.98	25.92	9.96	2.60241	63.98	1.8	-84.5019	137.57	24.369	177.139	0.124368	118.458	129.281	-7.08184	5.36126	35.6384	80.0231	24.5943	31.2504	-17.2275	100.324	-0.836	1.16	-8.545	6.51	13.92	98.51	1.73	93.9	-5.227	0.323	-16.617	9.17	9.93	86.35	1.8	0.0640325	0.0404624	0	Glu	RS	1	0	0	0
AK251	23	II-III	2.5	Fusiform	161.899	24.5268	10.2468	2.39362	57.257	1.6114	-95.5019	226.956	29.0541	128.016	0.0515215	89.3674	158.942	-3.20725	4.54667	20.3613	75.559	17.4612	37.6926	-18.0796	116.374	-4.513	0	-16.6	8.96	0	70.68	1.81	115.995	-5.695	0	-17.636	8.47	0	74.79	1.88	0.00325674	0.038674	0	Glu	RS	1	0	0	0
AK245	23.1	III-IV	3.5	Fusiform	174.095	24.5521	10.9986	2.2323	55.5497	1.41048	-100.507	289.629	36.9359	127.528	0.0920965	59.6901	193.402	-9.63835	8.02653	23.7244	55.0417	16.1175	28.7246	-15.2079	112.034	-2.844	0	-12.936	8.35	0	96.89	1.91	117.49	-4.211	0	-15.53	10.75	0	126.23	1.89	-0.0486995	-0.0104712	0	Glu	RS	1	0	0	0
AL003	26	II-III	2.5	Pyramidal	165.102	24.6788	11.6449	2.11928	56.8634	1.55849	-91.6491	280.367	41.9631	149.672	0.0966172	48.9917	154.142	-5.23267	5.51879	11.5417	74.1867	12.7726	46.7471	-31.7725	104.346	-8.099	0	-14.911	6.26	0	49.05	1.47	103.418	-7.361	0	-16.577	5.63	0	63.07	1.53	0.00889349	0.0408163	0	Glu	RS	1	0	0	0
BC126	25.3	II	2	Multipolar	132.59	13.78	13.12	1.0503	53.08	1.69	-79.6147	348.2	37.0572	106.425	0.0791886	36.2664	120.66	-1.09195	4.97691	7.782	48.679	18.3344	41.7346	-20.1861	100.487	-5.246	0	-10.529	6.29	0	61.01	1.43	99.823	-4.455	0	-11.859	5.8	0	63.76	1.51	0.00660782	0.0559441	0	Glu	RS	1	0	0	0
AK059	24.5	II-III	2	Pyramidal	168.57	20.28	12.43	1.63154	66.06	2.06	-86.5755	276.025	36.5187	132.302	0.0417908	53.8973	110.801	-5.78526	5.48485	19.44	31.3782	12.2065	45.7081	-25.8096	108.336	-2.557	0	-7.489	8.89	0	75.81	1.53	106.969	-1.631	0	-8.081	9.57	0	61.64	1.64	0.0126182	0.0718954	0	Glu	RS	1	0	0	0
AK032	25.8	II-III	2	Inverted Pyr.	166.85	20.44	10.67	1.91565	54.15	1.399	-86.6392	227.35	36.1645	159.07	0.107409	91.3955	180.199	-4.15468	4.60788	27.4109	79.1686	16.0132	30.2163	-14.0371	93.708	-4.663	0	-13.736	8.76	0	88.75	1.38	92.521	-4.066	0	-15.748	6.59	0	89.69	1.46	0.012667	0.057971	0	Glu	RS	1	0	0	0
AK093	23.4	II-III	2.5	Multipolar	149.891	16.0801	12.6573	1.27042	45.8198	1.1146	-86.5215	216.067	37.4569	173.358	0.0690664	88.4591	223.602	-6.50839	6.53073	11.169	35.7065	22.6093	16.1429	-8.91331	73.238	-10.779	0	-14.555	16.56	0	84.57	2.29	64.987	-8.838	0	-18.701	14.33	0	124.96	2.39	0.11266	0.0436681	0	Glu	RS	0	1	1	0
FP064	34.1	II-III	2.5	Pyramidal	166.029	29.1125	14.5737	1.99761	73.6488	2.59978	-76.0464	219.722	21.6626	98.5908	0.0212658	29.5939	76.181	-13.3007	14.8296	1.0498	26.7079	32.1391	27.315	-15.9972	76.75	-9.56	0	-13.12	7.76	0	22.03	1.2	74.48	-6.71	0	-13.24	6.43	0	29.28	1.33	0.0295765	0.108333	n.d.	Glu	RS	1	0	0	0
AL023	23.2	I	1	Round	128.462	15.259	11.3696	1.34209	41.1325	1.04806	-75.5117	324.941	29.0685	89.4579	0.145604	44.4166	377.065	-2.90935	4.41349	5.16968	83.9885	26.8701	38.9271	-13.9487	77.789	-14.52	0	-16.449	10.79	0	27.42	1.53	75.611	-11.602	0	-15.582	6.45	0	26.31	1.7	0.0279988	0.111111	0	Glu	RS	0	1	0	0
AK325	23.7	I-II	1.5	Round	147.969	15.4073	13.1272	1.17369	45.0848	1.09315	-68.4934	376.495	37.2612	98.9687	0.0689557	86.2654	30.7604	-2.96145	5.87155	2.04468	18.9586	34.8589	18.7437	-10.5552	64.964	-6.317	0	-7.894	8.75	0	31.51	2.16	60.488	-7.389	0	-10.22	8.5	0	43.41	2.29	0.0688997	0.0601852	n.d.	Glu	RS	1	0	0	0
TG075	25.4	IV	3	Ovoid	102.999	14.48	9.09	1.59296	37.95	1.1125	-82.6196	521.85	51.682	99.0361	0.147661	29.4344	200.102	-3.95952	7.07654	24.628	86.9215	18.7392	28.1162	-3.83355	83.804	-6.791	0	-19.101	7.55	0	66.81	1.6	80.893	-8.2	0	-20.899	8.17	0	70.69	1.77	0.0347358	0.10625	0	Glu	RS	1	0	0	0
TG077	25.7	IV	2.5	Multipolar	147.24	17.67	10.9	1.6211	50.01	1.3518	-81.6343	420.55	46.4238	110.388	0.0606808	34.3828	100.801	-2.02451	5.63158	13.849	54.2395	15.2449	28.1399	-8.86265	91.711	-3.772	0	-10.279	6.56	0	51.84	1.72	83.985	-7.666	0	-16.071	7.06	0	53.54	1.89	0.0842429	0.0988372	0	Glu	RS	1	0	0	0
AK025	24.8	II-III	2	Round	139.91	16.17	11.03	1.466	43.41	1.072	-82.5902	473	59.8817	126.6	0.0863092	44.7193	194.441	-4.03021	6.62871	21.509	69.8197	17.9574	28.6738	-11.6552	84.366	-10.266	0	-12.87	8.52	0	42.33	1.57	83.435	-8.112	0	-13.29	6.03	0	46.5	1.66	0.0110353	0.0573248	0	Glu	RS	1	0	0	0
AK054	23.8	II-III	3	Fusiform	84.011	19.75	5.85	3.37607	42.93	1.745	-72.5411	454.7	45.6541	100.405	0.125113	1.49476	120.781	-0.0720639	4.90034	22.665	72.0966	21.8818	25.853	-7.94671	86.475	-8.517	0.468	-19.324	7.88	8.94	54.04	1.75	83.821	-10.37	0	-22.162	6.54	0	51.66	1.83	0.030691	0.0457143	0	Glu	RS	1	0	0	0
AK021	26.1	II-III	2	Pyramidal	121.84	17	9.26	1.83585	45.12	1.329	-67.654	394.1	33.0639	83.8972	0.0709602	12.6555	240.961	-7.6944	10.9796	10.999	61.0848	16.9496	30.8756	-14.8326	77.991	-6.36	0	-12.219	6.4	0	56.96	1.95	75.257	-9.497	0	-14.319	9.76	0	48.39	2.01	0.0350553	0.0307692	0	Glu	RS	1	0	0	0
AL021	23.2	I-II	1.5	Pyramidal	119.413	18.7916	11.193	1.67887	47.7788	1.52127	-83.5117	241.6	28.3382	117.294	0.101984	58.7923	152.542	-1.76989	3.55038	11.3953	68.4312	18.8611	39.5431	-26.5829	90.435	-12.976	0	-15.375	6.5	0	51.09	1.52	90.319	-11.255	0	-15.54	8.28	0	66.01	1.6	0.00128269	0.0526316	0	Glu	RS	1	0	0	0
AL012	25.4	II	2	Pyramidal	160.911	23.5901	14.5755	1.61847	61.9189	1.89605	-80.6196	267.878	32.278	120.495	0.0612219	53.9737	307.304	-0.31667	4.29336	13.2812	78.5497	13.455	40.8816	-24.5942	87.851	-10.785	0	-15.918	7.31	0	64.71	1.46	89.112	-7.227	0	-13.281	7.03	0	90.15	1.45	-0.0143538	-0.00684932	0	Glu	RS	1	0	0	0
AL002	25.9	II-III	2.5	Pyramidal	146.93	20.7721	10.1992	2.03663	51.2425	1.42213	-87.8442	224.117	30.7312	137.121	0.0438625	58.8401	191.602	-1.60685	4.33128	8.60596	79.0265	15.6624	43.9518	-21.909	94.309	-11.142	0	-13.815	7.92	0	70.54	1.46	93.154	-11.001	0	-14.954	9.44	0	50.04	1.53	0.012247	0.0479452	0	Glu	RS	1	0	0	0
AK301	22.1	II-III	2.5	Inverted Pyr.	116.598	21.9468	9.30967	2.35742	49.7253	1.68755	-75.4577	379.8	47.5685	125.246	0.0690437	18.6023	231.923	-5.3188	4.87331	17.8528	43.9096	20.4166	24.7866	-10.2455	95.63	-3.021	0.183	-7.758	12.88	13.95	69.78	2.05	92.416	-2.005	0	-10.718	9.44	0	104.73	2.2	0.0336087	0.0731707	0	Glu	RS	1	0	0	0
AL019	22.9	II	2	Pyramidal	195.771	28.7098	12.9373	2.21916	73.8902	2.2193	-75.497	399.367	61.1252	153.055	0.101807	19.4244	502.466	-10.3353	6.52313	9.61914	41.6324	17.3989	26.8596	-16.8307	88.711	-6.635	0	-10.187	7.32	0	55.89	1.99	86.406	-5.994	0	-11.854	8.92	0	65.82	2.2	0.0259832	0.105528	0	Glu	RS	1	0	0	0
AK030	25.4	II-III	2	Pyramidal	152.27	22.72	8.85	2.56723	54.33	1.542	-85.6196	535.9	63.5174	118.525	0.082611	36.4177	186.578	-3.25646	4.72272	8.643	32.1639	22.2282	26.9585	-12.0943	92.584	-6.201	0	-13.672	6.41	0	47.86	1.59	89.263	-8.392	0	-16.504	8.24	0	55.68	1.8	0.0358701	0.132075	0	Glu	RS	1	0	0	0
AK011	25.8	II-III	2	Pyramidal	124.27	16.08	9.91	1.6226	42.46	1.154	-83.6392	266.275	38.6784	145.257	0.0620438	26.0866	136.301	-4.88243	4.80724	11.494	30.2279	14.829	28.9979	-30.169	94.196	-10.352	0	-13.68	8.03	0	50.87	1.67	91.418	-9.874	0	-13.67	8.36	0	36.34	1.72	0.0294917	0.0299401	0	Glu	RS	1	0	0	0
AK138	24.1	IV	4	Ovoid	126.26	16.88	9.18	1.83878	43.17	1.175	-71.5558	337.73	38.9165	115.23	0.303432	29.3337	150.801	-65.6909	33.3911	24.4629	100.427	21.7009	31.8717	-7.75637	87.672	-4.681	1.947	-16.077	5.2	15.76	135.98	1.39	82.084	-8.232	0	-21.27	9.11	0	86.89	1.42	0.0637376	0.0215827	0	Glu	RS	1	0	0	0
BC139	23.1	IV	4	Multipolar	109.4	13.35	10.59	1.26062	39.96	1.162	-71.7068	463.85	57.6996	124.393	0.238158	0.615358	112.699	-76.9309	46.7076	31.9763	100.511	26.9019	16.8736	-4.9024	92.409	-6.43	5.681	-13.677	4.73	17.83	122.91	1.44	89.261	-6.771	0.262	-19.259	7.3	9.17	102.73	1.48	0.0340659	0.0277778	0	Glu	RS	1	0	0	0
AK121	24.4	IV	4	Pyramidal	163.4	21.9	10.69	2.04864	51.59	1.3	-76.5706	372.248	37.239	100.038	0.25964	29.6333	123.441	-152.292	66.3656	30.719	97.0277	21.1124	31.7852	-18.7726	86.778	-5.359	3.433	-16.18	4.65	11.76	109.08	1.42	82.336	-7.855	0.842	-21.533	5.04	7.85	97.47	1.44	0.0511881	0.0140845	0	Glu	RS	1	0	0	0
TG140	22.5	IV-V	4	Fusiform	132.22	18.35	8.36	2.19498	51.45	1.59	-81.4774	359	30.7381	85.6214	0.209525	37.5	130.986	-2.40502	4.44699	24.17	122.632	28.0354	25.4687	1.66179	90.5	-7.59	2.6	-16.94	4.9	10.87	65.65	1.51	89.42	-8.12	0.29	-19.65	7.63	9.13	80.23	1.53	0.0119337	0.013245	1	Glu	RS	1	0	0	0
TG085	22.3	IV	4	Multipolar	102.64	14.77	9.08	1.62665	41.28	1.321	-77.4675	321.23	35.5537	110.68	0.177272	30.6704	111.141	-6.47746	6.61334	29.9133	87.1276	23.7546	22.4195	-4.83995	96.12	-6.83	1.912	-15.454	4.81	10.22	88.1	1.58	93.285	-8.124	0.672	-19.3	6.42	8.31	91.54	1.62	0.0294944	0.0253165	0	Glu	RS	1	0	0	0
BC140	23.5	IV	4	Multipolar	116.91	14.39	10.47	1.3744	41.93	1.197	-84.0264	307.15	31.7686	103.43	0.222329	48.9357	128.738	-6.39172	5.19428	31.7871	108.592	22.377	24.4604	-1.53809	98.143	-4.932	3.681	-13.484	4.82	15.02	80.84	1.43	94.55	-7.184	0.379	-21.313	6.22	6.62	74.46	1.45	0.0366098	0.013986	0	Glu	RS	1	0	0	0
AK123	25.1	III-IV	3.5	Fusiform	132.29	19.02	8.89	2.13948	45.63	1.253	-80.6049	242.92	24.1431	99.387	0.205142	59.9889	100.34	-5.46872	4.96624	22.5403	128.297	20.7695	49.2166	-11.8626	95.54	-10.471	1.181	-22.162	3.98	7.21	66.7	1.14	92.345	-12.696	0.433	-26.466	4.18	5.52	57.44	1.23	0.0334415	0.0789474	0	Glu	RS	1	0	0	0
AK119	25	III-IV	3.5	Fusiform	126.68	21.03	7.47	2.81526	51.42	1.66	-81.6	197.65	28.4204	143.792	0.171287	89.7125	76.6602	-5.53687	4.79473	34.79	120.684	25.7171	40.4155	-15.3048	97.721	-4.662	3.308	-12.86	3.96	9.71	65.52	1.16	91.454	-8.577	0.244	-21.753	4.64	5.55	54.09	1.17	0.0641316	0.00862069	0	Glu	RS	1	0	0	0
AK045	23.9	IV	4	Multipolar	98.42	14.88	8.72	1.70642	44.65	1.612	-85.546	247.95	38.4245	154.969	0.156022	64.5181	154.461	-2.7349	5.06058	18.744	91.7009	16.1761	26.1213	-8.92198	104.494	-6.47	1.929	-18.597	3.52	7.13	62.39	1.21	101.581	-7.611	1.202	-21.252	3.6	6.01	79.16	1.23	0.0278772	0.0165289	0	Glu	RS	1	0	0	0
TG131	25	III-IV	4	Round	109.77	13.4	10.21	1.31244	37.92	1.042	-80.6	312	38.1392	122.241	0.336519	37.4657	120.814	-7.88143	7.41199	20.462	110.884	25.4109	25.0153	-2.12307	93.67	-7.42	2.02	-14.42	4.93	10.57	84.89	1.35	89.76	-9.44	0	-20.69	8.76	0	10.12	1.36	0.0417423	0.00740741	0	Glu	RS	1	0	0	0
AK141	23.8	IV	4	Fusiform	130.26	21.66	8.25	2.62545	49.81	1.515	-76.5411	177.17	23.9463	135.16	0.297661	69.4781	119.281	-1.95308	5.07975	26.0071	75.2861	25.3279	38.4199	-10.896	96.754	-6.151	5.058	-13.231	4.33	14.56	104.05	1.29	92.352	-9.231	0.696	-20.654	4.71	7.85	61.35	1.29	0.0454968	0	0	Glu	RS	1	0	0	0
AK149	24.5	IV	4	Fusiform	149.735	20.672	10.0586	2.05515	51.6404	1.41725	-72.5755	291.15	26.4598	90.8803	0.292249	29.6639	141.941	-3.52301	7.12809	15.0085	101.531	23.2562	41.3076	-6.76365	95.857	-8.71	0.8	-15.863	5.19	7.22	51.22	1.31	93.937	-9.467	0	-17.816	5.08	0	48.71	1.34	0.0200298	0.0229008	0	Glu	RS	1	0	1	0
AK140	25.5	IV	4	Ovoid	136.584	19.0882	10.6403	1.79396	45.5781	1.21033	-79.6245	274.8	24.0229	87.4196	0.176454	50.0964	147	-4.35218	4.928	25.531	124.372	18.3566	30.7279	-4.60734	87.207	-5.438	2.264	-14.526	4.56	9.89	54.83	1.27	79.024	-9.351	0	-22.852	5	0	61.81	1.34	0.0938342	0.0551181	0	Glu	RS	0	0	1	0
AK049	25.2	II-III	4	Fusiform	89.68	17.16	6.41	2.67707	45.05	1.8	-75.6098	679.95	26.2727	38.6392	0.169244	-1.73098	248.34	-3.44281	8.85849	31.029	97.7834	24.8434	41.7332	0.846619	94.567	-9.052	0	-23.151	5.45	0	88.51	1.29	94.674	-7.407	0.415	-22.595	5.55	7.07	67.35	1.32	-0.00113147	0.0232558	0	Glu	RS	1	0	0	0
AK154	22.5	IV	4	Fusiform	131.35	23.22	8.15	2.84908	51.8	1.625	-75.4774	549.95	37.0983	67.4576	0.239258	19.1651	177.941	-6.31152	5.31804	23.2117	95.31	32.9179	40.9391	-9.93171	98.61	-10.04	6.744	-13.641	4.47	12.41	70.08	1.45	94.957	-12.042	1.828	-19.946	4.87	8.62	68.82	1.47	0.0370449	0.0137931	0	Glu	RS	1	0	0	0
AK133	24.2	IV	4	Fusiform	108.15	22.62	9.64	2.34647	49.91	1.83	-74.5608	564.9	33.4864	59.2785	0.169151	19.6677	71.6795	-4.5941	5.9349	25.5371	95.0281	28.4673	41.8474	-8.38931	92.671	-7.738	4.303	-12.523	4.44	13.69	79.54	1.4	89.348	-10.199	0.781	-19.556	5.49	6.64	69.26	1.46	0.035858	0.0428571	0	Glu	RS	1	0	0	0
AK130	23.9	III-IV	3.5	Fusiform	104.84	20.63	6.23	3.3114	52.06	2.057	-76.546	247.58	27.0603	109.299	0.233935	29.3509	114.281	-5.02835	4.49115	40.8926	129.754	23.7253	31.1526	-14.4086	98.796	-4.851	3.05	-15.521	3.68	9.04	58.78	1.25	96.675	-6.515	1.172	-17.239	4.28	7.24	51.2	1.38	0.0214685	0.104	0	Glu	RS	1	0	0	0
AK044	24.5	IV	4	Multipolar	102.41	12.4	10.77	1.15135	40.84	1.296	-75.5755	566.4	23.0675	40.7265	0.123993	27.0051	92.379	-5.67048	4.77229	27.411	120.246	23.9524	25.7101	-9.3564	100.216	-9.4	2.277	-14.801	4.15	7.82	51.5	1.27	98.48	-8.881	0.828	-16.461	4.14	6.52	56.73	1.29	0.0173226	0.015748	0	Glu	RS	1	0	0	0
AK050	25.1	IV	4	Inverted Pyr.	119.55	15.53	10.05	1.54527	43.15	1.239	-75.6049	324.9	33.9674	104.547	0.332048	18.6634	95.422	-2.22904	3.4132	22.327	50.4722	18.4148	41.7242	-12.3552	88.197	-7.371	0	-16.956	9.82	0	64.07	1.49	86.912	-5.873	0	-19.812	7.61	0	79.87	1.61	0.0145697	0.0805369	0	Glu	RS	1	0	0	0
TG074	24.5	IV	4	Ovoid	78.48	13.37	7.54	1.77321	34.3	1.194	-77.0755	462.95	31.8743	68.8504	0.270069	29.4603	77.6992	-6.98765	7.1589	29.3823	54.4127	27.534	26.5151	-2.44557	81.675	-6.824	0	-11.66	11.56	0	57.56	1.38	78.395	-6.421	0	-13.822	10.65	0	74.97	1.55	0.0401592	0.123188	0	Glu	RS	1	0	0	0
AK047	25.2	IV	4	Round	85.99	11.94	9.22	1.29501	33.67	1.049	-73.6098	553.4	29.1303	52.6388	0.231346	17.7676	98.8985	-6.70816	7.16353	15.993	53.4213	24.1933	29.3939	-6.54246	80.517	-6.196	0.409	-7.63	6.9	8.77	44.65	1.37	77.466	-7.532	0	-15.536	9.38	0	62.08	1.53	0.0378926	0.116788	0	Glu	RS	1	0	0	0
TG057	24	II-III	2.5	Pyramidal	96.88	15.99	8.1	1.97407	42.14	1.459	-75.5509	410.45	31.3167	76.2985	0.363162	36.5207	75.0801	-7.76463	5.63003	13.324	74.8482	28.1188	25.8391	-3.70919	80.046	-10.004	2.582	-11.951	4.9	13.47	59.14	1.29	72.107	-12.4	0	-19.409	7.91	0	69.91	1.39	0.0991805	0.0775194	0	Glu	RS	1	0	0	0
TG106	25	II-III	2.5	Multipolar	122.26	14.224	11.269	1.26222	43.887	1.2537	-81.6	439.46	33.9669	77.2924	0.187083	29.763	101.398	-3.28357	6.28965	20.08	102.234	17.468	28.7606	-11.6162	85.502	-5.023	0.846	-19.045	4.81	7.74	82.58	1.35	82.418	-6.128	0	-21.769	6.04	0	81.82	1.41	0.0360693	0.0444444	0	Glu	RS	1	0	0	0
TG102	24.8	II-III	3	Multipolar	67.574	11.383	7.785	1.46217	32.885	1.2735	-75.5902	540.767	39.1809	72.4544	0.147281	20.9513	97.7382	-57.292	30.2934	25.439	81.9543	30.3918	18.213	-1.91909	77.344	-6.696	1.398	-14.476	5.74	12.63	110.6	1.39	73.304	-7.678	0	-19.991	7.16	0	69.3	1.46	0.0522342	0.0503597	0	Glu	RS	1	0	0	0
TG104	25.1	IV	4	Round	85.217	11.14	9.81	1.13558	33.776	1.065	-71.6049	450.63	24.8839	55.2202	0.162515	21.5452	81.4805	6.15338	3.28795	9.34	85.2722	26.4667	29.8274	-14.6689	77.966	-11.121	0.403	-15.942	6.5	7.56	51.07	1.38	74.723	-12.103	0	-17.828	7.25	0	42.8	1.41	0.0415951	0.0217391	0	Glu	RS	1	0	0	0
AB015	23.3	IV	4	Round	123.81	14.24	11.19	1.27256	42.22	1.146	-81.5166	403.03	30.097	74.6768	0.234132	38.9065	87.84	-7.7197	5.55676	15.73	69.1774	15.5193	26.2589	-12.4152	93.901	-8.583	2.255	-12.567	4.87	10.08	61.05	1.47	87.25	-11.066	0	-20.227	5.26	0	81.87	1.49	0.0708299	0.0136054	0	Glu	RS	1	0	0	0
AK129	22.6	IV	4	Fusiform	198.302	23.99	9.63	2.49117	57.83	1.342	-74.4823	109.122	12.9067	118.278	0.0357029	148.36	181.59	-14.9025	16.2805	0.58593	70.2319	18.8256	138.819	-42.4896	84.895	-20.38	4.089	-16.638	1.93	5.41	7.56	0.54	87.009	-19.357	4.364	-15.21	2	6.07	9.01	0.54	-0.0249013	0	0	GABA	FS-Pvalb	0	1	1	0
AK152	23.1	III	3	Fusiform	147.15	20.01	8.41	2.37931	52.88	1.512	-73.5068	219.36	21.5241	98.1223	0.146693	79.2098	95.3595	-1.98345	18.3076	2.39257	68.4567	36.1202	166.697	-15.4885	86.093	-22.932	5.603	-17.694	1.73	6.39	9.37	0.47	83.872	-24.746	5.554	-20.364	1.85	4.89	10.93	0.47	0.0257977	0	0	GABA	FS-Pvalb	0	0	1	0
AK127	24.2	IV	4	Fusiform	190.88	25.92	9.98	2.59719	58.46	1.425	-76.5608	100.52	12.0768	120.143	0.110256	158.761	72.63	-3.47407	23.6491	0.79956	57.3869	49.481	208.055	-32.6311	87.203	-23.388	4.298	-19.847	1.37	4.39	8.17	0.38	89.497	-21.795	5.64	-17.138	1.35	4.13	8.15	0.38	-0.0263064	0	0	GABA	FS-Pvalb	0	1	1	0
AK161	22.2	IV	4	Fusiform	197.09	25.33	9.82	2.57943	59	1.41	-71.4626	185.65	23.0771	124.304	0.26658	69.0301	41.3202	-7.66309	22.8662	8.58764	73.0554	21.1036	159.696	-16.2502	91.14	-18.909	2.654	-16.864	1.94	4.58	7.61	0.48	90.904	-18.753	2.893	-17.163	1.84	4.75	11.68	0.48	0.00258942	0	0	GABA	FS-Pvalb	0	0	1	0
AK162	22.2	III	4	Fusiform	117.41	20.02	7.86	2.54707	45.75	1.42	-71.4626	168.35	12.8664	76.4265	0.0665049	118.283	158.32	15.8074	6.68008	0.59814	51.7842	15.7909	175.333	-23.8637	92.526	-22.85	6.647	-17.259	1.65	4.51	10.86	0.52	90.241	-23.931	7.251	-18.059	1.71	0.49	13.57	0.49	0.0246958	-0.0576923	0	GABA	FS-Pvalb	0	1	1	0
AK116	22.7	IV	4	Fusiform	97.04	15.09	7.53	2.00398	39.05	1.251	-75.4872	211.8	13.5265	63.8645	0.0673684	79.0205	367.519	-10.7588	9.90067	2.39258	58.2796	18.5913	134.087	-30.1188	84.686	-20.987	3.427	-18.634	2.11	6.51	11.63	0.57	79.672	-24.674	2.765	-22.916	2.33	5.43	12.94	0.56	0.059207	-0.0175439	0	GABA	FS-Pvalb	0	0	1	0
AK250	23.2	II-III	2.5	Fusiform	198.192	28.7928	11.8184	2.43627	65.8204	1.7395	-89.5117	209.633	13.9789	66.6829	0.085648	119.251	425.405	7.10952	16.1388	1.14746	42.1372	6.54529	139.203	-21.542	96.618	-27.174	0	-29.725	2.43	0	6.26	0.64	97.715	-26.546	0	-27.95	2.36	0	5.01	0.64	-0.011354	0	0	GABA	FS-Pvalb	0	1	1	0
AK052	24.6	II-III	2.5	Multipolar	179.08	23.11	8.86	2.60835	58.16	1.503	-79.5804	98.08	9.6896	98.7928	0.0467628	176.241	690.52	10.5305	13.6308	1.28784	56.506	42.2755	150.724	-21.9288	83.583	-14.795	1.624	-14.014	2.41	4.56	9.76	0.56	84.1	-15.015	2.429	-13.33	2.19	4.84	10.05	0.56	-0.00618547	0	1	GABA	FS-Pvalb	1	0	1	0
TG138	22.5	IV	4	Fusiform	162.32	25.37	10.17	2.49459	57.5	1.62	-81.4774	107.85	10.5669	97.9777	0.0574527	219.594	15.62	812.231	1.6127	2.44	21.6104	16.7598	106.955	-10.1634	72.55	-19.88	0	0	2.7	0	0	0.77	58.24	-27.18	0	0	3.01	3.18	0	0.77	0.197243	0	0	GABA	FS-Pvalb	0	1	1	0
TG197	22.3	II-III	2.5	Fusiform	147.34	23	9.27	2.48112	55.5	1.66	-76.4675	221.3	18.5591	83.864	0.0667929	90	178.203	0.943774	8.86901	1.46484	29.2024	5.52866	116.943	-19.8198	66.09	-21.97	0	0	4.08	0	0	0.85	65.91	-21.72	0	0	6.22	0	0	0.92	0.00272356	0.0823529	0	GABA	FS-Pvalb	0	1	1	0
TG200	22.8	II-III	2.5	Fusiform	156.33	27.03	7.83	3.45211	60.24	1.85	-80.4921	159.5	12.9134	80.9618	0.0599794	139.377	326.88	-2.32376	14.193	0.64086	30.8934	10.0173	121.697	-27.8327	75.22	-26.06	0	0	3.14	0	0	0.68	75.6	-25.76	0	0	2.97	0	0	0.68	-0.00505185	0	0	GABA	FS-Pvalb	0	0	1	0
TG108	25.8	II-III	2.5	Round	151.856	18.86	10.6	1.77925	51.557	1.392	-75.6392	170.9	15.6012	91.2885	0.141686	116.43	306.719	19.6108	4.97076	1.3855	44.6493	19.1577	112.013	-37.6466	73.778	-24.677	0	0	6.37	0	0	0.76	72.695	-24.631	0	0	7.19	0	0	0.78	0.0146792	0.0263158	0	GABA	FS-Pvalb	0	1	0	0
BC137	25.4	IV	2.5	Multipolar	121.4	13.77	11.54	1.19324	46.12	1.394	-82.6196	177.613	10.2777	57.8659	0.0338446	128.764	174.922	9.70841	16.2934	1.02539	47.686	13.3294	139.119	-46.6865	73.122	-20.447	0	0	5.72	0	0	0.57	74.213	-19.574	0	0	5.86	0	0	0.57	-0.0149203	0	0	GABA	FS-Pvalb	1	1	1	0
AK153	23.6	II-III	4	Multipolar	144.65	22.51	10.62	2.11959	53.41	1.569	-80.5313	126.77	11.5106	90.7991	0.0243843	188.762	378.3	-17.4838	20.1015	1.9165	33.5877	9.8989	127.584	-48.313	75.182	-21.754	0	0	3.9	0	0	0.64	78.996	-19.069	0	0	3.53	0	0	0.64	-0.0507302	0	0	GABA	FS-Pvalb	1	1	1	0
AL024	24	II	2	Fusiform	291.599	45.0624	12.5173	3.6	100.703	2.76749	-75.5509	171.532	14.9854	87.3617	0.0295486	49.2268	175.322	-5.61007	14.9889	1.61743	73.8252	7.77851	172.512	-34.9641	81.59	-22.536	0	0	1.87	0	0	0.49	82.354	-22.685	0	0	1.81	0	0	0.49	-0.00936389	0	0	GABA	FS-Pvalb	0	1	1	0
AK243	23.1	I-II	1.5	Fusiform	220.428	34.3234	12.7163	2.69916	80.0848	2.31538	-68.5068	285.449	17.0929	59.8806	0.0704039	28.8033	37.2005	-2.2457	21.5366	1.82495	50.4973	7.34081	119.075	-28.0154	81.122	-22.619	0	0	2.5	0	0	0.66	82.069	-21.289	0	0	2.54	0	0	0.66	-0.0116738	0	0	GABA	FS-Pvalb	1	1	1	0
AK146	23.2	III	2.5	Fusiform	183.57	26.11	8.41	3.10464	61.49	1.64	-71.5117	209.1	14.1149	67.5031	0.0787715	98.1829	8.28	-20.8925	19.9925	0.78125	42.7696	32.8189	190.241	-27.081	96.822	-18.51	0	0	1.71	0	0	0.49	90.793	-21.878	0	0	1.76	0	0	0.48	0.0622689	-0.0204082	0	GABA	FS-Pvalb	0	0	1	0
AK159	21.7	III	3	Fusiform	124.44	18.45	8.81	2.09421	45.43	1.32	-73.4381	221.44	23.2646	105.061	0.111075	58.941	299.261	10.7785	12.7239	0.61035	57.9308	15.269	148.427	-36.0334	89.803	-24.225	0	0	2.22	0	0	0.55	88.721	-25.398	0	0	2.13	0	0	0.55	0.0120486	0	0	GABA	FS-Pvalb	1	1	1	0
AK118	24.5	IV	4	Fusiform	132.32	18.06	8.81	2.04994	45.298	1.234	-76.5755	148.54	10.2901	69.2749	0.0773736	108.835	108.621	0.658381	20.1375	0.708	52.6429	11.7836	161.088	-32.4892	79.335	-25.173	0	0	2.25	0	0	0.5	82.353	-23.067	0	0	2.25	0	0	0.5	-0.0380412	0	0	GABA	FS-Pvalb	0	1	1	0
AK136	22.1	IV	4	Fusiform	119.3	18.04	8.87	2.03382	43.41	1.257	-72.4577	464.06	26.8764	57.9158	0.108207	49.2433	25.93	20.1855	13.7113	5.67016	26.2455	10.3975	89.7351	-32.3594	80.163	-26.203	0	0	3.33	0	0	0.81	68.906	-29.335	0	0	3.44	0	0	0.89	0.140426	0.0987654	0	GABA	FS-Pvalb	0	1	1	0
TG130	25	IV	4	Multipolar	91.95	12.64	9.24	1.36797	1.1	1.103	-85.6	276.2	16.0517	58.1162	0.0652604	77.9824	27.68	14.3418	18.3413	1.06812	65.0389	36.3612	96.4042	-37.622	78.7	-22.09	0	0	2.64	0	0	0.73	73.98	-25.43	0	0	2.8	0	0	0.74	0.0599746	0.0136986	0	GABA	FS-Pvalb	1	0	1	0
AK046	24.1	IV	4	Multipolar	153.21	17.31	11.55	1.4987	50.24	1.311	-79.5558	193.6	18.4746	95.4267	0.170128	61.3351	76.1405	51.9446	8.35439	2.31933	80.8781	44.8279	154.133	-21.9505	83.316	-25.33	0	0	1.56	0	0	0.38	78.73	-27.642	0	0	1.55	0	0	0.39	0.0550434	0.0263158	1	GABA	FS-Pvalb	1	1	1	0
AK252	23	II-III	2.5	Fusiform	183.076	31.8473	10.473	3.04089	73.8259	2.36906	-74.5019	183.654	23.6647	128.855	0.090607	139.704	412.71	-1.81167	11.4828	1.83105	40.4912	88.5066	78.6446	-14.4267	75.761	-21.251	0	0	4.78	0	0	1.01	79.942	-19.756	0	0	3.93	0	0	0.99	-0.0551867	-0.019802	0	GABA	FS-Pvalb	0	1	1	0
TG092	25	IV	4	Round	111.129	13.12	10.84	1.21033	38.257	1.048	-77.6	192.46	12.1818	63.2952	0.0646217	114.187	750.15	-26.9499	15.3129	1.129	70.8919	54.8146	96.2323	-2.32773	79.582	-24.8	0	0	2.11	0	0	0.56	69.432	-27.899	0	0	2.44	0	0	0.6	0.127541	0.0714286	0	GABA	FS-Pvalb	1	1	1	1
TG182	25.3	II-III	3	Fusiform	192.04	25.74	8.77	2.93501	62.14	1.6	-78.9147	183.54	11.9745	65.2419	0.118589	138.702	419.06	-29.5601	17.8399	2.0935	22.0355	6.24338	162.813	-30.2107	72.887	-28.778	0	0	2.46	0	0	0.62	75.328	-26.991	0	0	2.5	0	0	0.62	-0.0334902	0	0	GABA	FS-Pvalb	0	1	1	1
AK063	24.4	II-III	2	Multipolar	177.9	18.52	12.55	1.4757	52.65	1.24	-73.5706	133.167	13.2477	99.4822	0.0787941	100.973	92.5	6.8885	14.996	1.56861	59.7328	19.8317	85.9379	-22.1414	81.665	-18.75	0	0	4.08	0	0	0.72	78.76	-20.105	0	0	5.09	0	0	0.76	0.0355722	0.0555556	0	GABA	FS-Pvalb	0	1	1	1
FP062	33.4	II-III	2.5	Pyramidal	265.38	33.1125	14.3503	2.30744	83.486	2.09002	-84.0121	114.38	8.1452	71.2118	0.0441837	169.42	700.77	-124.795	30.5347	7.07397	0	0	263.291	-30.888	64.872	-30.317	0	0	1.47	0	0	0.35	71.039	-27.606	0	0	1.38	0	0	0.36	-0.0950641	0.0285714	n.d.	GABA	FS-Pvalb	1	1	1	0
AK292	33	II-III	2.5	Fusiform	162.645	25.421	10.7869	2.35664	64.9533	2.0642	-78.9925	195.202	16.3953	83.9917	0.0816946	99.3347	643.24	69.755	14.8586	1.15356	0	0	227.371	-68.4193	70.234	-24.334	0	0	1.48	0	0	0.36	69.844	-24.583	0	0	1.54	0	0	0.36	0.00555287	0	0	GABA	FS-Pvalb	1	0	1	0
TG187	26.1	II-III	4	Fusiform	176.07	25.34	8.96	2.82812	60.14	1.63	-76.654	333.75	21.2974	63.8124	0.109324	39.6855	628.69	-20.2661	18.7415	3.86	56.92	26.4859	149.533	-19.5918	84.269	-27.899	0	0	2.02	0	0	0.54	87.846	-26.668	0	0	1.86	0	0	0.53	-0.0424474	-0.0185185	0	GABA	FS-Pvalb	0	1	1	0
TG185	26	II-III	4	Fusiform	126.3	21.35	7.18	2.97354	48.59	1.49	-80.6491	160.46	7.41968	46.2401	0.0884066	100	583.121	27.935	5.93216	2.37427	43.6381	6.69055	202.908	-24.8502	83.16	-25.848	0	0	1.72	0	0	0.44	81.675	-26.864	0	0	1.82	0	0	0.44	0.0178571	0	0	GABA	FS-Pvalb	1	1	1	0
BC143	23.4	III-IV	3.5	Fusiform	166.9	22.1	9.71	2.276	52.92	1.335	-76.5215	114.62	11.911	103.917	0.0174527	118.205	659.6	3.97655	17.4666	2.02637	52.6737	12.4777	142.174	-48.1535	84.201	-22.519	0	0	1.9	0	0	0.52	86.184	-21.442	0	0	1.9	0	0	0.52	-0.0235508	0	0	GABA	FS-Pvalb	0	1	1	0
AK115	23.1	II-III	2.5	Fusiform	182.9	21.69	9.34	2.32227	55.31	1.33	-79.5068	148.46	10.4918	70.6709	0.0694162	148.703	458.85	1.05575	20.3138	1.8	43.3866	5.34723	136.574	-41.4639	82.403	-25.885	0	0	2.24	0	0	0.61	81.972	-26.282	0	0	2.16	0	0	0.6	0.00523039	-0.0163934	0	GABA	FS-Pvalb	0	1	1	0
AK258	21.5	II-III	2.5	Fusiform	124.658	22.3394	9.13303	2.446	50.7357	1.64323	-95.4283	320.862	30.7444	95.8182	0.11409	79.9999	642.83	9.45923	16.9678	1.9165	54.3405	11.6099	97.9011	-31.6972	101.269	-32.581	0	0	3.6	0	0	0.84	98.734	-32.225	0	0	3.98	0	0	0.86	0.0250323	0.0238095	0	GABA	FS-Pvalb	0	1	1	0
TG199	22.9	II-III	2	Fusiform	151.8	23.38	9.45	2.47407	54.01	1.53	-78.497	265.8	27.395	103.066	0.178598	49	373.641	-8.50729	6.07614	1.31226	71.2797	21.7522	100.98	-45.5554	79.46	-22.3	2.68	-19.71	2.45	9.03	12.19	0.7	77.38	-23.62	0	0	2.55	0	0	0.68	0.0261767	-0.0285714	0	GABA	FS-Pvalb	0	1	1	0
AK134	24.2	II	2	Fusiform	183.85	28.46	9.59	2.96767	62.35	1.68	-73.5608	263.675	27.3335	103.664	0.168196	39.8073	468.121	10.6029	9.17502	1.0498	47.9881	3.01345	141.579	-13.7634	81.02	-24.105	0	0	2.28	0	0	0.52	81.836	-24.115	0	0	2.32	0	0	0.53	-0.0100716	0.0192308	0	GABA	FS-Pvalb	0	0	1	0
TG095	22.6	IV	4	Multipolar	102.329	15.71	8.488	1.85085	42.9708	1.43595	-75.4823	339.05	15.726	46.3825	0.0528394	39.8384	788.61	-17.324	22.0564	1.685	51.4176	33.2213	102.56	-36.4215	85.564	-21.454	0	0	2.62	0	0	0.68	83.083	-22.211	0	0	2.8	0	0	0.69	0.0289958	0.0147059	0	GABA	FS-Pvalb	0	1	0	0
AK170	22.8	IV	3	Fusiform	153.47	21.24	8.84	2.40271	51.51	1.38	-68.4921	268.8	24.6927	91.8627	0.168646	59.9854	719.28	1.97628	3.42421	3.479	35.5032	52.5725	92.946	-26.5044	66.258	-25.938	0	0	3.7	0	0	0.93	64.808	-25.598	0	0	3.73	0	0	0.96	0.0218841	0.0322581	0	GABA	FS-Pvalb	0	0	1	0
AK038	24.7	II-III	2	Multipolar	126.44	16.49	9.94	1.65895	44.34	1.237	-76.5853	166.116	12.6804	76.3346	0.0439243	-28.8535	720.86	5.26343	23.4587	1.844	33.1152	7.35136	106.457	-15.0485	67.908	-29.718	0	0	4.44	0	0	0.59	71.356	-28.131	0	0	3.56	0	0	0.58	-0.0507746	-0.0169492	0	GABA	FS-Pvalb	1	1	1	0
TG086	23.4	IV	4	Pyramidal	139.23	17.86	10.04	1.77888	47.079	1.267	-75.5215	234.067	20.5625	87.8489	0.394009	29.5882	99.6211	-98.6372	47.6093	25.049	93.4688	35.0174	28.8534	-6.07827	95.16	-10.815	0	0	3.94	0	0	1.27	75.446	-11.133	0.415	-19.507	6.42	8.13	75.65	1.54	0.207167	0.212598	1	Glu	IB	1	0	0	0
AK164	21.9	III-IV	3.5	Ovoid	127.69	17.21	8.81	1.95346	45.43	1.29	-77.4479	209.44	26.2631	125.397	0.30571	78.6999	60.1405	-354.566	93.0896	26.806	58.5918	77.8092	40.6716	-12.4609	101.042	-4.02	0	0	4.02	0	0	1.44	72.413	-9.896	2.074	-23.294	5.49	8.9	73.67	1.66	0.283338	0.152778	0	Glu	IB	1	0	0	0
TG137	22.5	IV-V	3.5	Multipolar	93.26	15.32	6.76	2.26627	42.87	1.57	-82.4774	412	42.2428	102.531	0.255145	27.5	334.1	-198.006	72.3846	41.275	100.067	48.7645	13.776	4.82943	87.75	-5.68	0	0	5.07	0	0	1.49	69.52	-5.88	0.4	-27.79	7.71	8.63	135.43	2.15	0.207749	0.442953	0	Glu	IB	1	1	1	0
AK137	22.7	IV	4	Pyramidal	127.7	18.72	9.08	2.06167	49.34	1.517	-76.4872	507.05	49.1746	96.9818	0.213889	19.0911	192.941	-194.965	65.7087	23.6633	86.2096	29.2822	25.6625	-3.65831	89.916	-5.06	0	0	4.91	0	0	1.6	64.781	-6.018	0	-23.048	8.27	0	88.09	2.37	0.279539	0.48125	0	Glu	IB	1	0	0	0
AK167	22.4	IV	4	Fusiform	130.55	22.55	9.28	2.42996	53.45	1.74	-77.4725	303.13	34.6003	114.143	0.196833	39.4045	164.02	-170.317	69.3576	41.1316	97.7516	40.9099	22.5275	-2.24606	86.938	-7.689	0	0	4.31	0	0	1.62	68.505	-7.496	0.373	-24.207	8.78	10.47	88.31	2.16	0.212025	0.333333	0	Glu	IB	1	0	0	0
AK124	22.8	IV	4	Fusiform	146.096	22.53	9.5	2.37158	54.84	1.638	-76.4921	434.56	39.6481	91.2373	0.296562	19.1156	143.02	-147.958	67.8785	46.4355	92.4973	38.3399	23.467	-4.55708	92.49	-8.857	0	0	4.63	0	0	1.44	72.902	-9.436	0.342	-28.174	7.25	7.99	108.98	1.9	0.211785	0.319444	0	Glu	IB	1	0	0	0
TG070	25.4	IV	4	Round	95.06	13.07	9.27	1.40992	35.6	1.061	-83.6196	348.2	26.1259	75.0313	0.209937	40.7548	116.141	-136.202	77.9973	33.0994	121.066	25.1945	26.6184	-7.73705	88.169	-5.775	0	0	3.65	0	0	1.2	64.86	-6.41	0	-26.29	6.21	0	121.27	1.52	0.264367	0.266667	0	Glu	IB	1	0	0	0
BC136	25.3	IV	4	Round	96.65	11.92	10.41	1.14505	36.22	1.08	-84.8147	242.925	26.9212	110.821	0.177993	79.3247	126.5	-200.503	69.8727	41.748	128.337	29.741	26.1034	3.39191	92.261	-3.56	0	0	3.7	0	0	1.18	72.885	-7.724	0	-23.52	6.37	0	68.58	1.62	0.210013	0.372881	0	Glu	IB	1	0	0	0
BC142	23	IV	4	Round	103.6	13.71	9.66	1.41925	38.07	1.113	-77.5019	359.35	27.6658	76.9885	0.335917	39.0223	92.84	-97.3141	53.7081	50.1709	97.7694	31.3805	21.2064	-8.43815	88.906	-8.789	0	0	4.93	0	0	1.29	65.576	-13.257	0.232	-24.689	11.06	12.9	116.96	1.58	0.262412	0.224806	0	Glu	IB	1	0	0	0
AK071	23.8	II-III	4	Pyramidal	94.4	13.64	8.99	1.51724	38.98	1.281	-80.5411	556.65	41.9353	75.3351	0.220893	19.1361	149.801	-89.9691	44.6854	37.944	85.6528	28.2775	14.8026	0.713025	85.651	-9.322	0	0	4.46	0	0	1.4	57.178	-9.401	0.354	-28.192	7.72	8.6	122.78	1.85	0.33243	0.321429	0	Glu	IB	1	0	0	0
AK291	32.9	II-III	2.5	Fusiform	165.915	20.9631	10.2678	2.04164	51.1546	1.25508	-76.9875	315.976	31.3363	99.1732	0.0783409	79.4098	59.9408	-10698.6	206.609	0	0	0	204.236	-4838.26	72.66	-10.573	0	0	1.45	0	0	0.43	49.409	-18.359	5.272	-13.515	1.81	12.8	15.44	0.5	0.319997	0.162791	0	GABA	Burst. Vip	1	1	1	0
AK280	32.6	II-III	2.5	Fusiform	139.709	21.8825	9.65967	2.26535	51.4225	1.50616	-83.9728	358.542	16.9596	47.3017	0.00797253	48.8191	39.2005	-208.798	119.51	12.6099	231.843	13.5421	31.5299	4.69056	90.529	-12.028	0	0	1.35	0	0	0.46	70.825	-14.832	7.984	-18.5	1.64	5.82	34.72	0.5	0.217654	0.0869565	0	GABA	Burst. Vip	1	1	1	0
AK319	21	II-III	2.5	Fusiform	210.272	30.6193	12.3721	2.47488	70.4339	1.87747	-70.4038	442.264	24.1739	54.6594	0.0328293	29.5936	77.961	-108.731	55.1603	7.23267	85.8994	27.5366	60.5902	-34.4756	69.651	-10.022	0	0	4.12	0	0	1.37	62.221	-7.639	2.441	-12.217	4.83	9.81	42.75	1.55	0.106675	0.131387	n.d.	GABA	Burst. Vip	1	1	0	0
TG107	25.4	n.d.	2.5	Fusiform	78.94	15.63	7.76	2.01418	37.3	1.402	-70.6196	610.36	37.9828	62.2302	0.064276	-6.61809	360.879	-59.5871	39.9619	11.4	91.2706	27.8521	60.5363	-23.8576	98.5	-10.193	0	0	2.47	0	0	0.76	83.559	-9.441	5.536	-9.151	2.94	9.15	43.39	0.89	0.151685	0.171053	0	GABA	Burst. Vip	0	0	1	0
TG198	22.9	II-III	2.5	Ovoid	131.85	19.75	10	1.975	49.79	1.32	-88.297	398.6	25.9075	64.9962	0.0934562	18	76.2382	-163.76	84.1785	16.72	121.595	18.0135	46.0209	-8.13717	98.83	-8.95	0	0	3.11	0	0	0.98	70.4	-11.25	4.31	-15.79	3.9	10.41	56.95	1.19	0.287666	0.214286	0	GABA	Burst. Vip	0	0	1	0
TG103	25.1	II-III	4	Multipolar	153.29	17.537	11.456	1.53081	49.527	1.273	-77.6049	330.8	31.7714	96.0441	0.0744595	39.4462	86.0195	-67.6211	39.4272	9.069	93.4573	14.6031	61.8913	-30.4096	91.862	-10.251	0	0	2.72	0	0	0.77	68.873	-13.769	2.069	-17.419	3.57	8.06	39.15	0.89	0.250256	0.155844	0	GABA	Burst. Vip	0	1	1	0
AK289	33.9	II-III	2.5	Fusiform	123.221	26.831	7.61569	3.52312	57.8235	2.15931	-81.0366	438.183	24.8332	56.6732	0.0303936	39.2882	80.361	-1085.79	90.2354	8.69751	115.812	12.474	72.6663	-28.0497	80.057	-14.328	0	0	1.32	0	0	0.41	65.405	-18.181	7.074	-11.499	1.56	9.04	10.14	0.46	0.18302	0.121951	0	GABA	Burst. Vip	0	0	1	0
TG073	23	II-III	2	Fusiform	155.56	22.9	9.06	2.52759	57.61	1.698	-80.5019	226.45	16.0529	70.8894	0.070057	28.6268	36.8202	-37.1407	31.8659	8.704	95.6371	24.9894	66.7513	-37.496	105.71	-12.137	0	0	2.43	0	0	0.75	87.911	-15.018	6.713	-11.961	2.68	8.67	32.63	0.8	0.168376	0.0666667	0	GABA	Burst. Vip	1	1	1	0
AK042	25.1	II-III	2.5	Round	104.42	12.62	10.58	1.19282	37.09	1.048	-68.6049	375.76	16.3945	43.6302	0.00384414	16.312	67	-87.8164	53.2331	9.973	85.8526	34.7202	107.39	-48.0205	98.42	-16.955	0	0	1.81	0	0	0.64	87.012	-15.961	10.871	-10.416	1.98	9.65	48.2	0.6	0.115911	-0.0625	0	GABA	Burst. Vip	0	1	1	0
AK018	23.6	II-III	2	Inverted Pyr.	91.063	14.24	8.27	1.72189	38.05	1.27	-82.5313	352	19.5	55.3977	0.0581213	35.2496	64.3202	-90.5538	52.4684	11.8	95.5616	36.4505	42.1446	-10.212	104.827	-13.958	0	0	2.24	0	0	0.71	82.074	-16.125	8.917	-13.007	2.44	8.06	66.61	0.79	0.217053	0.112676	1	GABA	Burst. Vip	0	1	1	0
TG078	25.9	IV	3	Fusiform	118.87	20.85	9.29	2.24435	51.03	1.74	-71.6442	804.4	70.9919	88.2545	0.194991	5.94888	136.559	-41.839	25.2665	18.231	50.8878	17.3488	37.9538	-10.0779	79.1	-8.918	0	0	4.01	0	0	1.05	56.318	-14.825	0	-18.932	6.56	0	53.54	1.26	0.288015	0.2	0	GABA	Burst. Vip	1	1	1	0
BC127	22.7	II-III	3	Ovoid	116.77	14.73	10.22	1.44129	40.95	1.143	-67.4872	958.85	52.4901	54.7428	0.104635	9.47203	46.4005	-10.0568	14.8202	2.04468	21.6502	60.6053	40.0485	-10.391	79.661	-10.254	0	0	4.77	0	0	1.4	72.62	-9.125	0	0	5.46	0	0	1.72	0.088387	0.228571	0	GABA	Burst. Vip	1	1	1	0
TG125	25.4	II-III	2	Multipolar	86.9	14	9.17	1.52672	36.91	1.25	-71.6196	1657	44.9059	27.1007	0.0738405	-5.38014	345.79	-4.22604	7.58644	2.47	43.4361	13.9431	60.1344	-10.4238	80.34	-5.34	0	0	3.74	0	0	1.1	71.29	-12.35	0	0	4.17	0	0	1.1	0.112646	0	0	GABA	Burst. Vip	0	1	1	0
AK298	22.8	II-III	2.5	n.d.	n.d.	n.d.	n.d.	#VALUE!	n.d.	n.d.	-63.4921	1148.7	39.0427	33.9886	0.0215355	-1.25778	161.622	-20.7064	16.378	1.75781	44.2547	42.1152	63.2774	-29.9355	81.581	-18.134	0	0	3.44	0	0	1.05	76.554	-17.419	8.215	-10.809	3.58	15.36	60.34	1.11	0.0616197	0.0571429	0	GABA	Burst. Vip	0	1	0	0
BC119	23.1	II-III	2.5	Fusiform	92.29	16.67	8.16	2.04289	39.57	1.35	-63.5068	649.42	11.5963	17.8564	-0.071566	20.8795	8.73	-20.9186	52.4785	1.81274	40.4956	34.5209	90.6359	-18.8569	102.704	-16.298	0	0	2.9	0	0	0.79	86.077	-20.679	0	0	3.11	0	0	0.84	0.161892	0.0632911	0	GABA	Burst. Vip	0	0	1	0
BC113	21.8	II-III	2.5	Ovoid	84	13.66	7.85	1.74013	35.35	1.184	-76.443	670.78	18.1787	27.1008	0.0669309	49.1748	5.46	-42.8683	64.0807	6.72	70.1889	22.9901	81.5693	-34.0955	107.777	-13.587	0	0	2.84	0	0	0.95	78.436	-17.639	0	0	3.56	0	0	1.14	0.272238	0.2	0	GABA	Burst. Vip	0	1	1	0
BC111	24.4	II-III	2	Inverted Pyr.	90.56	12.29	9.71	1.26571	38.24	1.285	-74.5706	616.7	32.9645	53.4531	0.0423833	49.9292	7.3	-83.9136	84.1648	6.34	58.2425	18.3965	103.794	-72.2563	103.013	-11.48	0	0	2.34	0	0	0.72	82.395	-13.1	0	0	2.66	0	0	0.85	0.200149	0.180556	0	GABA	Burst. Vip	1	0	1	0
BC146	22.9	IV	4	Fusiform	104.17	16.75	7.96	2.10427	40.74	1.268	-75.497	590.2	28.3754	48.0776	0.0881219	18.8283	37	-13.2297	19.8889	4.406	93.7887	17.2886	86.5249	-42.9751	102.344	-16.156	0	0	2.43	0	0	0.73	93.693	-17.577	0	0	2.57	0	0	0.74	0.0845286	0.0136986	0	GABA	Burst. Vip	0	1	0	0
AK085	24	II-III	2.5	Ovoid	102.02	14.62	9.03	1.61905	39.74	1.232	-73.5509	658.767	45.6346	69.2728	0.0747505	9.20535	113.16	-129.262	70.7114	5.43	59.9687	21.4381	130.329	-49.1327	102.22	-20.052	0	0	1.92	0	0	0.57	89.788	-21.144	0	-9.982	2.17	0	34.41	0.62	0.12162	0.0877193	0	GABA	Burst. Vip	0	1	1	0
AK253	22.9	II-III	2.5	Fusiform	150.256	21.4336	9.72711	2.20349	51.3407	1.39599	-80.497	531.482	33.0537	62.1916	0.0775188	29.7474	62.8408	-47.7153	33.4042	9.8999	74.4232	28.7325	55.3973	-23.1843	104.896	-12.556	0	0	3.16	0	0	0.97	81.047	-14.014	5.249	-13.47	3.9	10.44	54.18	1.17	0.227359	0.206186	0	GABA	Burst. Vip	1	1	1	0
AK244	23.2	II	2	Round	93.735	13.7413	9.69244	1.41774	36.1921	1.11203	-73.5117	1234.1	45.1965	36.623	0.0141354	8.75181	46.1806	-68.7228	42.4086	3.18604	58.0474	23.6521	87.2892	-43.1921	95.644	-17.094	0	0	2.54	0	0	0.8	83.115	-18.029	0	0	2.83	0	0	0.88	0.130996	0.1	0	GABA	Burst. Vip	1	1	0	0
AK246	23.4	II-III	2.5	Ovoid	117.408	17.7114	9.81166	1.80514	44.7234	1.3557	-80.5215	738.55	43.2639	58.5795	0.0692418	19.2601	162.522	-186.841	92.9956	21.8689	75.7863	25.2231	68.5191	-24.9383	103.796	-13.575	0	0	3	0	0	0.89	79.625	-15.571	0	0	3.7	0	0	1.08	0.23287	0.213483	0	GABA	Burst. Vip	1	1	0	0
AK072	25.4	II-III	2.5	Ovoid	98.13	14.92	8.47	1.76151	38.99	1.233	-77.6196	313.53	18.9785	60.5317	0.0710026	48.9287	81.1992	-21.7884	14.6078	3.503	57.9924	27.9135	41.9021	-21.8057	95.54	-9.38	3.009	-6.87	3.88	10.43	13.27	0.99	86.122	-11.938	0	0	5.97	0	0	1.12	0.0985765	0.131313	0	GABA	Burst. Vip	1	1	1	0
BC116	20.6	II-III	2	Ovoid	64.38	12.65	6.54	1.93425	32.58	1.312	-81.3842	444.82	16.348	36.7519	0.0288882	49.4834	9.9	-69.3013	64.8046	19.843	80.3844	31.1797	58.5712	-35.4741	109.001	-11.194	0	0	3.35	0	0	1.14	70.02	-11.542	0	0	4.75	0	0	1.58	0.357621	0.385965	0	GABA	Burst. Vip	0	1	1	0
AK114	22.4	II-III	2.5	n.d.	n.d.	n.d.	n.d.	#VALUE!	n.d.	n.d.	-82.4725	340.36	29.8968	87.8388	0.0295684	39.3968	67.5	-122.831	69.4515	24.567	102.266	28.3389	48.3208	-23.5139	106.853	-8.838	0	0	2.62	0	0	0.88	75.766	-10.876	0	0	3.75	0	0	1.04	0.290932	0.181818	0	GABA	Burst. Vip	0	1	1	0
AK077	25.2	II-III	2.5	Fusiform	116.58	19.48	7.84	2.48469	47.87	1.564	-77.6098	485.55	31.16	64.1746	0.0565732	13.7516	212.719	-3124.72	127.871	16.284	130.894	26.4871	23.2936	-8.14281	90.549	-11.041	0	0	2.78	0	0	0.86	65.051	-12.817	0	0	3.26	0	0	1.08	0.281593	0.255814	0	GABA	Burst. Vip	0	1	1	0
AK015	22.8	II-III	2.5	Fusiform	109.8	18.14	8.6	2.1093	42.66	1.319	-70.4921	712.06	30.5861	42.9544	0.0799639	2.14843	305.641	-1158.15	85.2561	23.132	76.6285	46.8347	24.8425	1.39389	90.615	-8.243	0	0	4.15	0	0	1.39	63.429	-7.085	0	0	5.77	0	0	1.74	0.300017	0.251799	0	GABA	Burst. Vip	1	1	0	0
AK323	24.5	II-III	2.5	Fusiform	158.082	23.1996	9.45627	2.45336	53.3897	1.4349	-67.5755	478.883	32.0142	66.8517	0.0258713	8.96731	132.242	-16.2256	22.1886	4.63867	96.1772	21.871	83.2237	-31.554	80.599	-14.545	10.22	-6.913	2.74	12.22	20.56	0.89	74.146	-16.649	11.474	-8.074	3.17	17.02	27.95	0.93	0.080063	0.0449438	n.d.	GABA	Adapt. Vip	0	1	1	0
AK075	25.4	II-III	2	Fusiform	112.44	21.67	7.81	2.77465	47.83	1.62	-67.6196	472.4	18.5863	39.3444	0.0583112	-3.2431	58.879	-4.54195	6.37884	8.452	101.1	44.9985	34.0746	7.34325	90.833	-12.155	8.554	-9.583	2.93	8.89	94.02	0.88	85.573	-13.076	6.307	-11.823	3.21	9.76	40.84	0.93	0.0579085	0.0568182	0	GABA	Adapt. Vip	0	1	0	0
AL049	22.5	II-III	2.5	Fusiform	111.329	19.9108	8.52948	2.33435	46.0229	1.51402	-70.4774	946.7	46.782	49.4159	0.0479526	-4.55595	97.6412	-4.82591	11.1409	7.62329	81.0391	25.2815	110.688	-51.5293	86.81	-16.547	5.512	-12.549	2.35	9.09	26.55	0.63	84.534	-16.748	5.225	-12.866	2.22	8.7	23.66	0.65	0.0262182	0.031746	0	GABA	Adapt. Vip	0	1	1	0
AL055	22.5	II-III	2.5	Fusiform	130.947	25.6212	9.24358	2.77178	56.8702	1.96546	-70.4774	535.752	30.632	57.1758	0.0406836	-6.93076	162.242	-3.59783	6.11733	10.4004	90.7811	18.7127	103.867	-56.971	85.983	-12.771	6.21	-10.352	2.57	8.96	44.55	0.76	84.121	-13.682	5.732	-10.862	2.63	7.86	33.38	0.78	0.0216554	0.0263158	0	GABA	Adapt. Vip	0	1	0	0
BC131	24.7	II-III	2.5	Fusiform	127.29	18.24	9.13	1.99781	48.48	1.469	-82.5853	544.15	41.859	76.9255	0.0599979	28.5232	168.18	-13.0935	15.6118	3.31421	74.9752	16.7268	79.9033	-33.0451	87.719	-16.571	8.264	-9.546	2.35	9.93	36.55	0.61	83.337	-17.073	6.244	-11.462	2.27	10.78	26.13	0.63	0.049955	0.0327869	0	GABA	Adapt. Vip	0	0	1	0
AK073	24.8	II-III	2.5	Fusiform	104.03	18.85	7.23	2.60719	45.42	1.578	-80.5902	652.75	35.4209	54.2641	0.0414287	19.1128	121.379	5.36606	5.09031	5.792	61.357	17.7328	92.8681	-52.1741	91.024	-15.139	8.409	-11.119	2.41	10.27	55.73	0.68	87.784	-15.555	7.556	-11.581	2.53	8.51	52.61	0.7	0.035595	0.0294118	0	GABA	Adapt. Vip	0	1	1	0
AK111	25.6	II	2	Ovoid	70.85	13.34	7.35	1.81497	33.18	1.24	-69.6294	879.2	41.9355	47.6973	0.0281092	-3.70119	113.359	-5.96409	6.62082	11.823	71.4058	21.8291	96.5186	-46.792	100.816	-16.901	10.566	-10.737	2.57	9.63	60.83	0.74	99.863	-17.361	8.575	-11.691	2.55	10.47	48.39	0.75	0.00945286	0.0135135	0	GABA	Adapt. Vip	0	1	0	0
AK061	24.5	II-III	2	Fusiform	91.4	15.99	7.39	2.16373	39.58	1.364	-77.5755	796.5	42.1151	52.8752	0.0681622	18.3513	78.7615	0.533888	11.5361	2.838	64.0258	23.9102	96.9978	-32.2803	99.885	-17.301	11.472	-6.597	2.19	14.01	20.39	0.6	91.546	-20.844	10.035	-11.823	2.25	11.5	19.74	0.63	0.083486	0.05	0	GABA	Adapt. Vip	0	1	0	0
TG187	23	II-III	3.5	Ovoid	124.32	16.88	9.07	1.86108	44.4	1.26	-79.5019	484.6	17.5541	36.2239	0.0806203	20	50.8985	2.56513	7.72912	3.09	74.1847	21.5575	83.57	-27.1104	102.8	-20.596	14.563	-12.033	2.78	12.8	46.02	0.89	93.556	-21.483	7.636	-15.63	2.97	9.87	22.47	0.89	0.0899222	0	0	GABA	Adapt. Vip	0	1	1	0
AK262	23.2	II-III	2.5	Fusiform	134.495	22.0969	9.59189	2.30371	50.2721	1.49533	-75.5117	577.107	25.7773	44.6664	0.0364661	7.47197	34.6804	-8.18165	19.1923	3.08228	58.0114	26.3828	92.3733	-43.7232	102.706	-18.687	11.766	-7.959	2.81	15.74	31.48	0.88	98.463	-17.922	9.002	-10.006	3	11.35	21.16	0.89	0.0413121	0.0113636	0	GABA	Adapt. Vip	1	1	1	0
TG064	24	II-III	2.5	Ovoid	108.91	16.16	8.7	1.85747	41.47	1.257	-81.5509	437.6	31.105	71.0809	0.0618437	20.8293	97.6602	-69.4614	41.5441	8.429	103.989	27.6725	32.011	-23.1583	97.199	-15.027	12.652	-9.1	2.72	14.56	69.84	0.87	92.096	-16.235	11.92	-10.906	2.87	11.39	77.83	0.89	0.0525005	0.0229885	0	GABA	Adapt. Vip	0	1	1	0
TG088	25.4	IV	4	Fusiform	112.94	17.4	8.27	2.10399	41.85	1.233	-76.6196	580.75	30.455	52.4408	0.0815406	15.8833	70.6211	-0.53365	4.96849	2.28881	113.237	33.7971	78.2632	-83.6691	101.315	-17.514	7.214	-13.791	2.09	7.15	29.75	0.62	95.08	-20.764	8.581	-15.553	2.12	9.9	50.06	0.63	0.0615407	0.016129	0	GABA	Adapt. Vip	0	1	1	0
AK125	24.3	III-IV	3.5	Fusiform	127.36	21.16	8.29	2.55247	52.13	1.698	-75.5657	534.95	35.425	66.2211	0.0759937	9.85472	52.0195	-12.112	11.2276	3.08227	62.9963	27.1728	74.7864	-40.7695	96.143	-17.926	7.037	-11.743	2.87	13.62	18.99	0.81	93.915	-16.583	7.373	-11.102	2.75	7.63	21.34	0.82	0.0231738	0.0123457	0	GABA	Adapt. Vip	0	0	1	0
AK117	23.9	IV	4	Fusiform	125.64	17.95	8.19	2.1917	43.99	1.226	-77.546	325.73	22.0246	67.6161	0.145178	39.6121	34.84	-0.512432	9.45367	2.53296	90.8361	23.4658	76.9825	-34.1327	101.245	-14.313	8.255	-7.581	2.43	7.56	22.64	0.71	94.55	-16.417	7.05	-11.249	2.51	8.61	22.25	0.74	0.0661267	0.0422535	0	GABA	Adapt. Vip	0	0	1	1
AK122	24.6	IV	4	Multipolar	146.02	21.02	9.72	2.16255	50.89	1.412	-77.5804	474.03	20.8658	44.0179	0.162012	19.7351	43.719	-4.34806	11.1058	4.986	72.078	10.5534	131.237	-3.47138	100.857	-21.689	8.85	-17.185	1.93	6.68	22.48	0.57	98.527	-22.28	8.532	-16.51	2.02	6.49	23.51	0.61	0.023102	0.0701754	0	GABA	Adapt. Vip	0	0	1	0
AK040	24.5	II-III	4	Ovoid	78.15	13.66	7.32	1.86612	34.81	1.234	-72.5755	386.36	14.4155	37.3111	0.0838626	14.2461	173.34	-7.68131	17.3325	1.40381	57.2773	19.4796	99.2328	-42.4557	90.094	-18.494	6.598	-13.208	2.18	9.44	30.25	0.57	89.383	-18.127	6.854	-11.951	2.26	10.63	18.64	0.57	0.00789176	0	0	GABA	Adapt. Vip	0	1	1	0
AK143	24.7	II-III	3	Fusiform	165.17	30.73	7.85	3.91465	68.94	2.29	-79.5853	259.85	15.9395	61.3412	0.0586531	49.662	39.7812	-6.44003	9.2241	2.30102	96.431	32.867	82.6255	-35.5797	104.36	-18.009	10.803	-9.812	2.01	8.61	27.25	0.62	98.089	-20.558	10.138	-13	2.02	8.07	22.01	0.63	0.0600901	0.016129	0	GABA	Adapt. Vip	0	1	1	0
AK037	24.6	II-III	2.5	Fusiform	112.72	21.74	6.72	3.23512	50.65	1.811	-82.5804	284.83	13.3111	46.7335	0.0279434	35.5344	75.7812	3.88818	6.91714	3.46	60.1945	35.9669	128.206	-44.417	102.545	-18.437	10.866	-10.901	2.02	9.76	36.1	0.65	101.55	-17.275	9.667	-8.606	2.15	7.77	29.5	0.67	0.00970306	0.0307692	0	GABA	Adapt. Vip	0	1	1	0
AK286	33.6	II-III	2.5	Fusiform	161.899	27.1741	9.22382	2.94608	61.7888	1.87657	-77.0219	380.202	19.7872	52.0439	0.0291079	59.0402	29.5804	49.3049	0.883308	1.98364	31.1156	22.3511	260.633	-88.7222	78.458	-21.005	0	0	1.1	0	0	0.31	64.34	-26.779	4.678	-22.382	1.32	6.84	7.48	0.35	0.179943	0.129032	0	GABA	Adapt. Vip	0	1	1	0
AK287	33	II-III	2.5	Fusiform	158.933	29.2111	9.56403	3.05427	66.7721	2.23237	-80.9925	466.401	31.4379	67.4053	0.0921636	29.7239	178.942	-21.4948	10.6114	2.11792	111.171	14.7182	163.385	-92.539	83.549	-14.901	5.139	-12.151	1.52	7.1	30.52	0.42	79.853	-16.703	4.21	-15.288	1.56	5.21	23.57	0.43	0.0442375	0.0238095	0	GABA	Adapt. Vip	0	0	1	0
AK285	33.5	II-III	2.5	Fusiform	111.071	19.6502	9.18811	2.13866	45.4273	1.47851	-80.017	470.074	26.0037	55.3182	0.0261331	39.4536	140.122	-33.2321	17.6931	1.61133	80.5927	31.7056	189.622	-71.0246	75.608	-17.991	4.217	-14.933	1.61	6.73	17.59	0.41	70.329	-21.035	4.53	-17.639	1.56	6.78	15.54	0.42	0.0698207	0.0243902	0	GABA	Adapt. Vip	0	1	1	0
BC169	22.5	II-III	2.5	Fusiform	136.324	21.5449	9.72435	2.21556	52.0428	1.58102	-91.4774	1007.1	17.732	17.607	0.0946753	9.28636	49.6606	-8.66716	14.2477	2.45972	88.1323	22.8079	104.062	-51.3678	111.598	-24.152	0.416	-24.334	3.67	4.56	7.39	0.69	111.424	-22.827	0	-24.648	2.46	0	7.06	0.7	0.00155917	0.0144928	0	GABA	Adapt. Vip	0	0	1	0
AK282	33.2	II-III	2.5	Fusiform	96.6062	17.5242	8.04388	2.17858	40.6636	1.36206	-64.0023	774.8	14.6289	18.8809	0.237746	-3.82303	80.921	-15.3498	17.1317	4.39453	92.7581	16.8887	148.886	-61.4052	81.73	-24.2	0	0	2.11	0	0	0.52	79.71	-25.62	0	0	2.07	0	0	0.52	0.0247155	0	0	GABA	Adapt. Vip	0	1	1	0
AK281	33.5	II-III	2.5	Ovoid	115.713	17.5616	9.12976	1.92356	41.9365	1.20946	-78.017	454.9	13.1847	28.9837	0.088518	39.7604	119.802	4.94349	7.70964	4.42505	91.5649	30.4629	113.181	-30.6989	74.04	-17.079	1.362	-16.152	2.43	6.13	7.91	0.63	70.831	-18.898	0	0	2.95	0	0	0.67	0.0433414	0.0634921	0	GABA	Adapt. Vip	1	1	1	0
AK279	32.8	II-III	2.5	Ovoid	118.882	19.4831	10.3618	1.88029	46.899	1.47232	-77.9826	350.832	12.5808	35.86	0.117772	39.2907	57.5407	-23.2864	20.3338	1.39771	100.084	18.3217	127.167	-63.5474	85.878	-17.035	0	-18.468	2.51	0	7.36	0.6	82.853	-19.635	0	-20.801	2.73	0	8.26	0.64	0.0352244	0.0666667	0	GABA	Adapt. Vip	1	1	1	0
AK295	33.8	II-III	2.5	Fusiform	131.412	19.4834	9.57946	2.03388	46.0466	1.28395	-64.0317	280.327	16.1106	57.4707	0.102165	-18.3909	67.54	-15.5629	17.7351	1.76391	44.8193	30.8905	75.635	-36.5262	74.907	-15.222	0	0	3.52	0	0	0.76	73.363	-15.338	0	0	5.04	0	0	0.8	0.0206122	0.0526316	0	GABA	Adapt. Vip	0	1	1	0
AK278	32.6	II-III	2.5	Ovoid	118.882	19.4831	10.3618	1.88029	46.899	1.47232	-63.9728	360.514	22.4207	62.1908	0.0459518	19.3821	13.88	-26.7953	19.9184	4.87671	53.8487	36.1407	99.7574	-75.1581	86.34	-11.096	0	-12.952	2.91	0	6.59	0.75	83.723	-12.318	0	-13.735	3.95	0	9.79	0.77	0.0303104	0.0266667	0	GABA	Adapt. Vip	0	1	1	0
BC216	34	II-III	2.5	Fusiform	201.964	32.5038	11.2356	2.89293	72.4699	2.06933	-69.2415	565.88	27.5747	48.7289	0.0591902	4.83975	45.7606	-7.70358	12.019	3.97339	162.386	31.4284	110.357	-59.9948	97.359	-18.724	7.385	-13.882	1.71	5.43	24.33	0.46	95.133	-18.679	5.743	-15.078	1.75	5.51	22.85	0.48	0.0228638	0.0434783	0	GABA	Adapt. Vip	1	0	1	1
BC164	22.5	II-III	2.5	Fusiform	139.365	21.9988	9.62872	2.2847	51.5064	1.51481	-78.8317	665.9	15.2818	22.9491	0.124168	9.39393	76.961	-4.3016	4.69398	7.73926	147.783	15.4307	133.686	-69.9812	88.733	-8.885	2.063	-10.046	2.42	5.44	17.16	0.69	83.092	-18.512	0.238	-21.278	3.18	4.83	12.41	0.71	0.0635727	0.0289855	1	GABA	Adapt. Vip	1	1	1	1
AK294	34	II-III	2.5	Fusiform	119.076	19.6325	8.23809	2.38314	45.5733	1.388	-74.0415	289.545	18.0572	62.3641	0.0655551	29.5981	94.6012	-35.5478	24.8584	4.92554	140.492	19.1517	47.6928	-53.1367	69.816	-13.351	4.377	-11.465	2.08	5.71	17.67	0.62	67.248	-14.021	4.45	-12.312	2.21	6.05	24.75	0.64	0.0367824	0.0322581	0	GABA	Adapt. Vip	0	1	0	0
AK288	33.6	II-III	2.5	Fusiform	136.761	24.1889	10.419	2.32162	56.1916	1.83726	-77.0219	588.059	28.7078	48.818	0.0725293	19.2003	76.061	-123.201	22.3308	0.97046	199.293	29.2716	4.16352	-1.87409	85.716	-11.043	3.723	-8.006	2.03	6.33	12.99	0.56	77.504	-10.963	2.783	-11.977	2.29	7.52	30.65	0.59	0.0958048	0.0535714	0	GABA	Adapt. Vip	0	1	1	0
AK293	33.3	II-III	2.5	Ovoid	257.937	26.4085	13.2741	1.98947	63.8242	1.25674	-81.0072	333.4	58.1461	174.403	0.111228	39.4952	286.704	-9.04461	7.88835	3.63159	96.2844	63.1392	92.2242	-43.7357	77.041	-17.714	3.029	-14.911	2.45	13.64	18.02	0.63	75.738	-17.104	1.372	-16.125	2.82	7.44	29.06	0.74	0.0169131	0.174603	1	GABA	Adapt. Vip	0	1	1	0
AK277	32.5	II-III	2.5	Fusiform	168.476	28.1346	10.0775	2.79183	62.8412	1.86526	-71.9679	431.93	28.163	65.2027	0.0407891	29.7559	89.9411	0.729939	7.70503	3.71094	79.7316	48.5569	81.2578	-27.0045	64.32	-18.258	2.689	-16.052	4.69	30.11	34.36	0.95	61.449	-20.66	2.543	-18.483	5.23	18.77	22.6	1	0.0446362	0.0526316	0	GABA	Adapt. Vip	1	1	1	0
TG127	25.4	II-III	2.5	Fusiform	141.83	23.17	10	2.317	52.72	1.559	-75.6196	607.33	39.8108	65.5505	0.122563	7.53779	292.479	-10.1058	11.7272	18.461	71.9501	26.3069	51.6991	-39.8912	90.09	-8.91	3.05	-6.85	3.57	10.57	21.49	0.97	86.24	-9.85	2.56	-8.44	3.66	9.09	37.61	1.05	0.042735	0.0824742	0	GABA	Adapt. Vip	0	1	1	0
TG122	23	II-III	2.5	Multipolar	99.14	14.09	8.68	1.62327	38.97	1.219	-75.5019	696.5	37.2256	53.4467	0.0713837	7.42814	156.542	-2.35053	7.11141	7.86	58.4576	35.9752	56.9073	-15.856	75.42	-11.49	4.48	-9.77	3.84	12.55	42.05	1.2	74.87	-12	4.48	-9.78	4.16	12.54	43.37	1.26	0.0072925	0.05	0	GABA	Adapt. Vip	0	1	1	0
AK249	23.1	II-III	2.5	Fusiform	182.035	27.3495	10.5022	2.60417	66.6131	1.93979	-74.5068	780.65	47.2376	60.5106	0.0206491	9.46529	138.722	-3.34873	7.72973	1.41602	51.4549	47.0743	59.1996	-21.6404	88.203	-14.69	5.78	-15.057	3.79	11.05	82.63	1.11	85.25	-16.38	5.534	-16.636	3.93	10	75.44	1.15	0.0334796	0.036036	0	GABA	Adapt. Vip	1	1	1	0
BC128	25.1	II	2	Ovoid	140.82	17.81	10.19	1.74779	46.95	1.246	-78.6049	469.35	25.0658	53.4053	0.135999	15.0697	109.68	-5.21397	9.41507	10.461	73.2522	25.1655	62.9072	-32.5516	100.697	-10.779	2.962	-12.457	3.5	7.28	37.06	1.01	99.169	-11.67	2.096	-13.684	3.58	7.36	34.58	1.03	0.0151742	0.019802	0	GABA	Adapt. Vip	0	1	1	0
AK039	24.7	II-III	2.5	Fusiform	132.17	22.4	9.44	2.37288	49.93	1.5	-66.5853	346.066	18.6912	54.0105	0.262527	60.9176	87.11	-7.66217	10.7671	8.002	34.4334	32.1894	44.1521	-25.9632	94.025	-11.792	5.061	-7.598	3.66	14.3	27.19	0.98	88.716	-14.172	2.88	-12.177	4.62	13.14	33.64	1.02	0.0564637	0.0408163	0	GABA	Adapt. Vip	0	1	1	0
AL046	22.5	II-III	2.5	Fusiform	86.7416	15.4406	7.5307	2.05035	36.351	1.21226	-68.4774	1148.1	41.721	36.3392	0.0840313	-4.57158	29.44	-4.33077	9.5455	6.427	59.4285	35.4646	53.0446	-27.9566	88.051	-13.145	8.483	-8.154	4.05	14.05	48.62	1.22	85.359	-12.341	5.206	-12.022	4.48	14.54	59.24	1.25	0.0305732	0.0245902	0	GABA	Adapt. Vip	0	1	0	0
AK028	23.4	II-III	3	Fusiform	143.19	21.25	8.75	2.42857	52.92	1.556	-72.5215	461	16.6702	36.161	0.0588786	8.009	42.3985	-8.13565	6.08265	12.161	82.4422	19.2444	15.5888	-4.39219	88.21	-6.83	8.319	-7.037	3.96	12.62	63.33	1.3	79.195	-9.207	6.773	-8.118	4.03	14.7	57.99	1.42	0.102199	0.0923077	0	GABA	Adapt. Vip	0	1	1	0
AK024	24.1	II-III	2.5	Fusiform	108.16	20.16	8.03	2.51059	48.62	1.739	-63.5558	913.1	56.656	62.048	0.185387	-5.54853	175.301	-6.47265	5.09534	5.072	33.999	28.7033	39.7329	-16.0975	79.117	-12.398	2.27	-14.514	6.71	14.66	56.41	1.43	76.349	-14.911	0	-18.524	12.92	0	55.57	1.52	0.0349862	0.0629371	0	GABA	Adapt. Vip	0	1	1	0
AK260	23.3	II-III	2.5	Fusiform	131.198	22.4523	9.50161	2.36299	50.7097	1.55972	-75.5166	742.2	44.9155	60.5167	0.0979225	19.4538	61.6008	-10.1487	12.594	4.42505	40.2887	34.7714	42.8209	-12.0161	84.138	-12.615	3.132	-9.74	5.99	21.91	25.11	1.63	80.306	-12.352	1.91	-10.747	6.83	13.52	16.83	1.82	0.0455442	0.116564	0	GABA	Adapt. Vip	1	1	0	0
AK254	23	II-III	2.5	Ovoid	142.767	21.0627	12.2715	1.71639	51.9035	1.5016	-67.5019	799.92	37.4794	46.8539	0.119519	0.232091	273.403	-2.77935	9.16441	2.55127	36.0689	43.595	42.7095	-17.4172	92.474	-15.068	1.634	-13.77	6.22	17.3	29.96	1.44	88.751	-16.449	0.958	-15.741	7.79	16.48	23.12	1.6	0.04026	0.111111	0	GABA	Adapt. Vip	0	1	1	0
AK019	23.9	II-III	2.5	Fusiform	89.81	15.95	7.32	2.17896	40.65	1.464	-74.546	689.4	26.3488	38.2199	0.085801	9.145	88.379	-8.92747	6.35078	3.962	36.4014	33.9651	46.8049	-31.1986	94.262	-11.2	1.801	-10.01	5.39	19.73	25.21	1.37	90.699	-12.964	1.436	-12.011	6.28	18.41	32.23	1.48	0.0377989	0.080292	0	GABA	Adapt. Vip	0	1	1	0
AL022	24.6	I-II	1.5	Fusiform	147.598	33.6876	9.06299	3.71705	73.2606	2.89368	-68.5804	654.115	28.6773	43.8413	0.0406693	-15.7731	85.7	0.386322	5.70621	8.3374	76.8327	28.7373	81.3088	-29.0824	97.26	-16.498	0.793	-17.792	3.58	6.22	21.12	0.93	95.262	-16.553	0.641	-17.219	4.12	5.86	20.29	0.95	0.0205429	0.0215054	0	GABA	Adapt. Vip	0	1	1	0
AL020	22.5	II-III	2.5	Fusiform	122.714	19.4406	8.87604	2.19024	46.2645	1.38801	-76.4774	787.541	40.1411	50.9701	0.0597012	14.4996	290.704	-7.2705	10.2764	3.28369	52.9874	18.6116	49.4775	-14.7258	87.491	-18.041	3.781	-16.687	3.74	10.24	38.8	0.99	87.526	-18.451	3.769	-16.687	3.75	9.09	32.18	1.01	-0.000400041	0.020202	0	GABA	Adapt. Vip	0	1	1	0
AK385	23	II-III	2.5	Ovoid	172.037	20.8678	11.917	1.7511	52.2284	1.26178	-75.5019	639.65	32.1664	50.2875	0.0691755	9.02984	111.261	-16.6005	12.8477	9.34448	19.16	17.2817	67.261	-56.7154	80.857	-23.395	4.328	-19.849	3.48	11.55	22	0.79	75.686	-22.589	2.985	-20.331	3.55	12.25	20.71	0.85	0.0639524	0.0759494	0	GABA	Adapt. Vip	0	0	1	0
BC150	23.1	II-III	2.5	Fusiform	89.5	17.89	7.33	2.44065	44.04	7.72	-75.5068	627.233	18.6075	29.666	0.10544	10	189.141	-7.36054	8.26436	4.48	32.2572	31.5373	42.3192	-11.1516	93.659	-15.805	2.576	-13.948	4.83	12.17	23.64	1.25	93.366	-16.51	2.698	-15.045	4.82	14.43	29.43	1.29	0.00312837	0.032	0	GABA	Adapt. Vip	0	1	1	0
AK300	21.7	II-III	2.5	Fusiform	123.653	20.1549	9.5976	2.1	48.2575	1.49869	-70.4381	941.2	37.9056	40.2737	0.0601036	9.91387	126.382	6.99801	5.43289	1.62964	41.1958	15.5415	42.2635	-14.9215	85.723	-19.21	5.447	-15.686	4.28	12.08	43.37	1.27	83.601	-18.463	3.503	-16.327	4.46	11.08	29.39	1.3	0.0247541	0.023622	0	GABA	Adapt. Vip	0	1	1	0
AK350	24.2	II-III	2.5	Ovoid	107.435	15.6555	8.66586	1.80658	39.2283	1.13984	-71.5608	507	15.1702	29.9215	-0.010737	9.07058	197.23	8.71005	6.76784	3.6438	70.7776	30.5848	58.9091	-22.9801	95.856	-14.325	2.887	-11.859	3.15	7.65	11.05	0.9	93.737	-14.056	2.676	-12.317	3.2	7.36	33.64	0.92	0.0221061	0.0222222	n.d.	GABA	Adapt. Vip	0	1	0	0
AK241	23	II-III	2.5	Ovoid	150.602	17.9094	10.468	1.71088	45.697	1.10341	-73.5019	605.226	27.8629	46.0371	0.0539974	9.14893	131.822	-9.36647	10.8311	7.39136	58.8839	21.0119	48.976	-21.0231	96.21	-15.234	3.729	-15	4.48	10.88	31.03	1.38	96.129	-14.056	2.985	-14.092	4.48	9.85	27.53	1.42	0.000841908	0.0289855	0	GABA	Adapt. Vip	0	1	1	0
AK302	22	II-III	2.5	Ovoid	154.65	20.6954	11.7663	1.75887	49.9658	1.28466	-66.4528	744.722	26.8218	36.0159	0.176589	7.52371	47.7406	-2.08483	13.208	8.38623	56.9628	16.5623	44.9897	-13.2178	96.907	-7.833	1.485	-6.958	5.33	12.04	18.51	1.22	91.361	-10.623	0.732	-10.681	6.71	10.05	19.96	1.42	0.0572301	0.163934	0	GABA	Adapt. Vip	0	1	0	0
BC124	22.3	IV	4	Fusiform	102.64	17.44	7.63	2.28571	42.2	1.381	-81.4675	567.3	28.0422	49.431	0.0428691	19.8898	55.7792	-1.14902	16.6335	11.719	70.324	11.2894	69.9504	-24.3931	108.07	-10.711	8.594	-5.89	3.19	12.79	32.08	0.96	102.82	-11.938	5.719	-8.349	3.58	7.9	31.32	1	0.0485796	0.0416667	0	GABA	Adapt. Vip	0	0	1	0
AK128	21.8	III-IV	3.5	Fusiform	120.57	18.66	8.49	2.19788	44.11	1.284	-73.443	430.5	13.5338	31.4374	0.0875518	19.0414	28.39	-4.43498	16.6752	5.19404	64.0018	18.4668	70.8939	-13.171	104.586	-9.794	5.591	-5.379	3.73	10.69	19.91	0.98	102.032	-10.187	4.931	-7.01	3.88	10.9	25.08	1.06	0.0244201	0.0816327	0	GABA	Adapt. Vip	0	0	1	0
AK067	25	II-III	2	Fusiform	96.09	17.14	7.19	2.38387	40.31	1.346	-76.6	468.15	24.672	52.7011	0.120515	16.8069	455.442	-5.54246	11.4425	16.76	104.298	18.6476	58.5087	-31.7668	94.93	-9.196	6.238	-8.618	2.76	8.17	42.62	0.8	92.119	-10.682	4.504	-10.127	2.67	7.3	34.8	0.81	0.0296113	0.0125	0	GABA	Adapt. Vip	1	1	1	0
AK069	25.2	II-III	2.5	Fusiform	79.98	15.46	7.03	2.19915	37.46	1.4	-63.6098	315.557	9.53935	30.2302	0.0494833	-17.1524	43.34	72.6191	2.65902	3.172	57.7142	10.1917	64.178	-27.574	100.043	-9.802	1.603	-9.125	4.05	8.67	17.22	1.06	95.918	-11.017	1.16	-10.541	4.33	8.72	15.62	1.1	0.0412323	0.0377358	0	GABA	Adapt. Vip	0	1	1	0
BC132	26.7	II-III	2.5	Fusiform	87.49	15.79	7.98	1.9787	37.84	1.3	-62.6834	669.767	28.3471	42.3238	0.134413	-14.02	47.37	-8.36306	8.59439	5.347	76.2261	13.9748	56.2761	-19.5547	103.306	-4.733	4.786	-4.542	2.85	7.85	32.7	0.79	95.053	-8.468	4.37	-9.103	2.83	7.07	51.68	0.79	0.0798889	0	0	GABA	Adapt. Vip	0	1	1	0
AK057	25.9	II-III	2.5	Fusiform	105	17.35	7.81	2.22151	44.29	1.487	-70.6442	368.03	27.3989	74.4475	0.100585	11.0377	130.82	-18.6817	9.49661	6.269	64.9265	20.8583	55.574	-30.3764	87.243	-7.104	2.612	-8.74	3.98	8.48	30.24	1.13	84.747	-7.617	0.756	-10.4	4.51	7.71	33.6	1.16	0.0286097	0.0265487	0	GABA	Adapt. Vip	0	1	1	0
AK010	25.8	II-III	2.5	Fusiform	119.92	18.638	8.381	2.22384	48.79	1.5797	-65.6392	528	25.898	49.0492	0.0449484	3.02632	46.961	-13.2421	18.3119	20.129	112.409	17.405	63.4247	-30.5392	98.65	-5.17	5.062	-3.253	3.71	8.97	32.74	1.01	94.281	-7.196	1.532	-8.032	4.52	9.69	26.12	1.08	0.0442879	0.0693069	0	GABA	Adapt. Vip	1	1	1	0
AK284	33.1	III-IV	3.5	Fusiform	173.054	33.6209	10.232	3.28584	77.5976	2.76889	-65.9974	616.401	29.2609	47.4706	0.384645	9.56955	94.9212	-3.74986	11.2019	1.26953	185.63	19.5449	95.9999	-14.9223	89.612	-11.76	2.935	-9.845	1.59	5.15	24.13	0.5	88.652	-10.314	5.344	-8.285	1.82	4.97	20.51	0.52	0.0107129	0.04	0	GABA	Adapt. Sst	0	1	1	1
AK284	33.5	III-IV	3.5	Fusiform	153.296	28.4089	8.82978	3.21739	63.9188	2.12088	-76.017	257.072	15.7784	61.3776	0.293987	39.4799	97.6412	-23.5214	9.83289	3.479	125.039	23.1514	123.387	-53.5684	84.883	-14.478	3.176	-12.378	1.66	5.8	18.91	0.46	84.516	-13.209	2.51	-12.426	1.65	4.63	17.53	0.48	0.0043236	0.0434783	0	GABA	Adapt. Sst	0	1	1	0
TG188	23.3	II-III	3.5	Fusiform	151.34	23.71	7.87	3.01271	54.67	1.57	-69.5166	326.25	26.6043	81.5457	0.341415	10	33.1405	-6.8941	13.1339	2.86865	64.913	33.2278	70.0084	-20.1631	108.15	-6.561	4.412	-2.604	3.56	12.09	29.53	1.16	103.027	-7.529	4.142	-3.997	3.57	10.27	42.93	1.23	0.0473694	0.0603448	0	GABA	Adapt. Sst	0	1	1	0
AK148	24	IV	4	Fusiform	143.36	22.36	7.53	2.96946	55.29	1.697	-70.5509	219.36	13.9429	63.5617	0.346827	-7.56055	77.66	-20.7	11.4538	7.61719	97.5168	39.4644	83.3125	-22.7374	101.249	-12.073	7.422	-6.61	2.27	9.22	26.76	0.7	98.373	-12.208	6.873	-7.202	2.34	8.12	27.63	0.74	0.0284052	0.0571429	0	GABA	Adapt. Sst	0	1	1	0
AK131	24.3	IV	4	Fusiform	83.91	15.03	6.76	2.22337	36.44	1.26	-73.5657	219.84	18.7176	85.1419	0.317042	-10.5673	59.32	-16.7077	12.0095	9.97319	133.112	36.0729	91.4847	-21.5568	93.665	-9.258	8.032	-3.356	2.27	15.95	30.39	0.71	90.233	-9.082	5.687	-5.36	2.34	6.95	39.89	0.72	0.0366412	0.0140845	0	GABA	Adapt. Sst	0	0	1	0
AK248	23.3	II-III	2.5	Fusiform	186.392	29.1353	10.7765	2.7036	67.4703	1.94352	-67.5166	576.387	47.3092	82.0789	0.27822	-7.48181	91.55	-2.37028	4.36681	4.20532	37.0346	81.806	33.4451	-3.09406	110.212	-14.618	2.216	-15.295	4.01	9.8	34.85	1.1	104.683	-13.347	1.88	-14.934	4.29	9.17	34.85	1.15	0.050167	0.0454545	0	GABA	Adapt. Sst	1	1	0	0
AK247	23.3	II-III	3.5	Fusiform	153.277	23.8285	11.0372	2.15892	54.8352	1.5611	-77.5166	818.8	80.7628	98.6356	0.351943	9.53352	159.782	1.55701	2.9783	5.33447	50.2169	43.746	42.4678	-20.2856	112.257	-13.157	2.439	-13.543	4.88	12.94	63.18	1.5	109.248	-12.645	1.695	-12.749	5.41	13.49	47.71	1.6	0.0268046	0.0666667	0	GABA	Adapt. Sst	1	1	1	0
TG090	24.9	II	2	Multipolar	133.69	17.84	10.56	1.68939	49.18	1.44	-80.5951	312.5	22.2446	71.1827	0.295354	-18.4401	124.92	-75.0249	43.3909	6.122	83.9903	34.8593	55.6193	-23.4891	92.331	-9.271	8.417	-2.911	2.94	20.13	48.66	0.92	85.949	-8.631	5.31	-6.787	3.29	17.21	65.1	1.02	0.0691209	0.108696	0	GABA	Adapt. Sst	1	1	1	0
AK062	24.6	II-III	2	Fusiform	134.17	22.41	7.67	2.92177	51.21	1.56	-63.5804	224.48	16.6031	73.9625	0.0662609	50	187.16	-14.3225	10.8863	1.13	59.2823	33.2126	54.7765	-19.3147	84.211	-11.15	3.973	-7.69	3.43	15.24	17.78	1.13	81.303	-9.444	3.442	-7.503	3.55	13.48	27.61	1.21	0.0345323	0.0707965	0	GABA	Adapt. Sst	1	1	1	0
AK158	20.3	IV	4	Fusiform	230.86	34.67	9.516	3.64334	74.68	1.922	-66.3694	365.6	38.9345	106.495	0.225283	8.51232	28.02	-2.94264	7.04686	2.06	65.5312	37.9816	48.7732	-17.9876	103.57	-11.121	5.286	-8.911	4.1	9.48	41.68	1.27	99.616	-11.738	5.2	-8.557	4.02	10.89	39.7	1.3	0.0381771	0.023622	0	GABA	Adapt. Sst	0	1	0	0
AK155	22.9	II-III	2.5	Fusiform	237.37	31.42	9.6	3.27292	73.48	1.81	-69.497	386.36	43.3894	112.303	0.319497	-7.06477	140.35	6.36151	3.20144	1.0978	71.5071	45.7325	60.2457	-14.3524	99.297	-15.002	6.116	-11.072	3.4	13.62	53.01	0.89	96.134	-14.26	5.096	-11.414	3.22	11.23	37.87	0.97	0.0318539	0.0898876	0	GABA	Adapt. Sst	1	1	1	0
AK060	23.8	II-III	2	Fusiform	197.41	31.69	8.69	3.64672	69.68	1.96	-71.5411	281.225	34.499	122.674	0.291326	7.71799	173.059	-8.06867	10.0673	4.27	53.0968	33.2033	43.4661	-10.2612	95.262	-6.696	2.844	-9.406	4.22	9.96	46.85	1.3	92.079	-6.5	0.653	-11.774	5.13	7.99	47.03	1.35	0.0334131	0.0384615	0	GABA	Adapt. Sst	0	1	1	0
AL007	22.7	II-III	2.5	Ovoid	159.317	19.6426	11.3619	1.72881	51.8086	1.3407	-69.4872	385	43.4045	112.739	0.418412	-8.62246	413.69	0.92483	5.79119	2.14844	31.0412	88.1431	36.2188	-12.867	90.021	-19.373	3.51	-16.626	5.29	12.27	38.89	1.47	88.744	-19.641	3.558	-16.596	5.63	20.55	33.85	1.5	0.0141856	0.0204082	0	GABA	Adapt. Sst	0	1	1	1
AK058	26	II-III	2.5	Fusiform	182.85	29.15	9.04	3.22456	66.67	1.93	-62.6491	215.6	13.3153	61.7593	0.488377	7.72247	90.8202	-16.167	15.1007	6.287	36.8269	71.0511	49.2228	-14.4954	85.82	-24.826	0	0	4.79	0	0	1.19	81.634	-28.686	0	0	6.2	0	0	1.31	0.0487765	0.10084	0	GABA	Adapt. Sst	0	1	1	1
BC172	22.5	II-III	2.5	Fusiform	300.61	47.8268	10.8992	4.3881	104.934	2.91488	-85.4774	462.69	44.385	95.9283	0.255955	-10.9454	63.82	-5.63646	11.7444	1.17187	54.8441	24.7421	105.604	-38.8766	117.827	-20.928	0	0	4.34	0	0	0.64	115.681	-18.516	0	0	3.5	0	0	0.67	0.0182131	0.046875	0	GABA	Adapt. Sst	0	1	1	0
BC121	22.4	II-III	2.5	Fusiform	101.91	17.84	7.36	2.42391	43	1.44	-71.4725	324.96	22.6271	69.6304	0.0524766	43.074	6.93	-37.3058	44.3165	1.5315	88.8067	29.8229	65.0072	-25.9149	105.925	-10.822	0	0	2.88	0	0	0.95	91.907	-12.744	0	0	3.45	0	0	1.03	0.132339	0.0842105	0	GABA	Adapt. Sst	0	0	1	0
BC118	22.6	II-III	3.5	Ovoid	100.3	14.4	9	1.6	38.65	1.185	-70.4823	487.06	19.7517	40.5529	0.208888	36.0517	3.99	-2.11136	30.2692	2.30102	59.331	35.8362	60.9661	-10.0871	105.777	-13.589	0	0	3.54	0	0	1.02	97.696	-14.377	0	0	4.08	0	0	1.08	0.0763966	0.0588235	0	GABA	Adapt. Sst	0	1	1	0
AK172	22.4	IV	4	Fusiform	172.575	23.6816	10.3674	2.28425	54.4661	1.36793	-68.4725	92.5	9.60042	103.788	0.0848507	99.6405	50	-19.5849	13.1336	12.76	94.9846	38.1391	84.2581	-26.643	96.96	-6.78	0.78	-8.89	3.01	4.18	19.29	0.76	95.59	-6.9	0.37	-9.58	2.75	3.71	17.38	0.78	0.0141295	0.0263158	1	GABA	Adapt. Sst	0	0	1	0
AK257	23.1	II-III	2.5	Fusiform	148.423	24.428	10.3342	2.36379	56.7148	1.72458	-77.5068	668.806	33.9644	50.7836	0.104614	19.2531	271.363	-9.66826	6.42925	1.14136	47.9605	19.98	113.925	-41.8398	84.862	-25.346	4.191	-22.174	3.04	10.08	22.15	0.81	88.095	-22.898	4.923	-19.171	2.93	11.6	24.64	0.8	-0.0380971	-0.0123457	0	GABA	Adapt. Sst	1	1	1	0
AK157	23.1	III-IV	3	Fusiform	200.09	23.2	10.81	2.14616	57.43	1.312	-76.5068	216.56	16.9163	78.1137	0.120587	59.4523	91.7615	-6.9964	10.3751	2.6184	85.5442	18.1574	99.5193	-52.5472	96.509	-16.868	3.046	-15.009	2.91	6.68	15.04	0.78	93.439	-17.322	2.161	-16.467	3.1	7.67	17.96	0.81	0.0318105	0.0384615	0	GABA	Adapt. Sst	1	1	1	0
AK156	23.1	II-III	3	Fusiform	206.55	29.42	9.69	3.03612	68.03	1.78	-69.5068	266.875	29.2819	109.721	0.0960238	29.4394	107.961	0.879128	3.96481	0.58593	92.9107	37.9286	85.9854	-11.6972	90.842	-17.7	5.511	-13.483	2.4	7.53	18	0.69	89.658	-17.295	4.993	-13.3	2.4	7.41	17.11	0.7	0.0130336	0.0144928	0	GABA	Adapt. Sst	1	1	1	0
TG089	26.1	IV	2.5	Fusiform	108.99	17.46	8.77	1.99088	41.96	1.29	-70.654	227.45	16.8069	73.8927	0.154787	-35.9571	535.02	0.350693	4.69218	2.466	73.4321	35.7202	72.9785	-36.2003	84.363	-21.082	0	0	2.4	0	0	0.68	85.137	-19.159	0	0	2.43	0	0	0.71	-0.00917464	0.0441176	0	GABA	Adapt. Sst	0	1	0	0
AK142	24.2	II-III	3	Fusiform	146.88	18.14	10.39	1.74591	45.65	1.129	-71.5608	209.6	18.3802	87.6918	0.27863	-8.60965	227.87	-20.105	11.24	5.19	102.811	38.1244	88.331	-39.2244	78.791	-12.315	0	0	2.72	0	0	0.74	76.63	-11.761	2.991	-9.052	2.52	10.93	17.61	0.78	0.027427	0.0540541	0	GABA	Adapt. Sst	0	1	1	0
AK055	25.8	II-III	2.5	Ovoid	72.8	13.76	7.37	1.86703	33.23	1.207	-71.6392	242.625	23.5631	97.1174	0.2017	22.869	331.27	-64.5151	22.0283	2.786	49.797	26.7893	81.5223	-42.5452	65.536	-16.756	0	-17.38	4.19	0	5.96	1.14	68.164	-12.622	0	0	5.2	0	0	1.18	-0.0401001	0.0350877	0	GABA	Adapt. Sst	0	1	1	0
FP074	33.7	II-III	2.5	Pyramidal	163.285	25.9833	11.6491	2.2305	62.3021	1.89169	-72.7268	998.5	72.0651	72.1734	0.0741631	0.0780663	603.468	0.0872227	5.51333	11.1816	69.0223	15.6328	48.3747	-25.0826	91.976	-5.972	0	-15.054	4.68	0	27.71	1.23	91.665	-8.018	0	-15.171	5.49	0	65.96	1.28	0.00338132	0.0406504	n.d.	GABA	Adapt. Npy	1	0	0	0
BC209	33.6	II-III	2.5	Pyramidal	224.869	32.8815	12.492	2.6322	77.5106	2.1261	-64.0219	281.98	35.6243	126.336	0.161539	-61.8393	166.54	-0.682825	5.52055	3.16772	57.0753	17.4383	42.183	-21.2322	89.715	-11.713	0	-15.802	8.29	0	20.95	1.01	89.364	-7.605	0	-14.41	5.85	0	22.01	1.05	0.00391239	0.039604	1	GABA	Adapt. Npy	1	0	0	0
AL018	25.6	II-III	2.5	Fusiform	193.064	26.1901	11.4004	2.29729	63.3625	1.65483	-67.6294	353.068	44.4218	125.816	0.0481472	-18.3832	365.02	-2.9139	5.30559	4.13818	89.4206	37.2606	81.0153	-40.8848	93.455	-17.224	0	-19.484	5.57	0	26.45	0.94	91.998	-18.372	0	-20.269	5.47	0	20.06	0.98	0.0155904	0.0425532	0	GABA	Adapt. Npy	0	1	1	0
AL011	25.5	II-III	2.5	Fusiform	290.968	40.3733	12.7053	3.17766	87.9276	2.11444	-80.6245	489.859	40.2417	82.1494	0.0817054	28.8216	89.5411	-10.5025	7.05215	5.11475	108.991	21.8388	68.2425	-27.2843	86.422	-18.054	0	-19.125	6.34	0	18.1	1.11	86.44	-16.864	0	-18.176	6.34	0	22.38	1.22	-0.00020828	0.0990991	0	GABA	Adapt. Npy	1	1	1	0
AL010	24.9	II	2	Ovoid	167.958	20.0634	12.0404	1.66634	53.7576	1.36921	-80.5951	719.663	47.981	66.6715	0.0680812	24.2448	210.283	-2.89706	8.41719	4.60205	77.3836	26.9563	41.5989	-17.8703	85.307	-13.352	0	-17.44	6.62	0	33.19	1.44	84.31	-11.127	0	-17.866	6.04	0	37.38	1.53	0.0116872	0.0625	0	GABA	Adapt. Npy	0	1	1	0
AK256	23.3	II-III	2.5	Fusiform	207.468	26.2946	11.6464	2.25773	61.2993	1.44129	-77.5166	295.585	28.3467	95.9003	0.200626	59.3428	42.8805	-3.458	8.41879	4.18091	74.5315	22.8177	56.8459	-12.6754	97.719	-18.909	0	-20.673	4.24	0	14.4	1.08	91.134	-22.01	0	-24.713	5.18	0	13.23	1.19	0.0673871	0.101852	0	GABA	Adapt. Npy	1	1	1	0
TG121	23	II-III	2.5	Fusiform	128.19	24.19	10.4	2.32596	53.28	1.762	-82.5019	402	30.624	76.1791	0.149317	47.7256	284.09	1.94126	6.02015	5.89	71.6784	28.2331	40.7153	-26.9584	83.63	-11.34	0	-12.76	8.84	0	37.27	1.77	81.77	-11.34	0	-14.68	7.88	0	35.78	1.83	0.0222408	0.0338983	0	GABA	Adapt. Npy	0	1	1	0
TG071	25.5	II-III	2.5	Ovoid	127.25	17.59	9.36	1.87927	46.17	1.33	-75.6245	523.7	38.7383	73.9704	0.0995371	12.7756	182.56	-5.66493	6.56887	12.567	78.8811	24.8707	48.6519	-19.0654	71.02	-10.511	0	-14.045	4.8	0	30.66	1.44	72.935	-9.617	0	-14.174	5.84	0	43.25	1.53	-0.0269642	0.0625	0	GABA	Adapt. Npy	0	1	1	0
TG183	26.9	II-III	2.5	Fusiform	281.1	42.69	10.34	4.12863	90.64	2.32	-73.6932	337	40.3352	119.689	0.0584434	29.9541	644.53	-0.760104	6.15815	2.35	100.173	34.9827	75.0836	-28.1139	85.29	-15.98	0.76	-15.424	4.54	9.39	14.15	0.97	84.36	-15.515	0	-16.376	6.34	0	18.83	1.09	0.010904	0.123711	0	GABA	Adapt. Npy	1	1	1	0
AK094	23.6	II-III	2.5	Inverted Pyr.	213.32	29.01	10.04	2.88944	73.44	2.012	-74.5313	455.13	37.8346	83.1292	0.049132	39.1192	674.8	-2.68015	9.23435	8.777	61.4028	29.1304	42.227	-13.6183	90.039	-10.559	0	-12.494	5.96	0	23.25	1.39	88.739	-11.322	0	-12.976	8.17	0	23.59	1.52	0.0144382	0.0935252	0	GABA	Adapt. Npy	1	1	1	0
TG123	25.4	II-III	1.5	Fusiform	129.53	18.43	8.48	2.17335	46.57	1.332	-81.6196	579	52.2646	90.267	0.131036	27.4689	567.125	-3.78685	7.6413	5.42	70.7877	36.1608	45.737	-18.9628	81.44	-10.25	0.21	-11.6	6.05	8.25	22.83	1.45	80.87	-9.57	0.19	-11.93	9.3	9.51	33.05	1.59	0.00699902	0.0965517	0	GABA	Adapt. Npy	0	1	1	0
AK005	25.5	I	1	Fusiform	118.15	18.24	8.36	2.18182	45.77	1.411	-75.6245	555.4	31.4339	56.5969	0.110836	2.39805	735.98	0.994017	6.605	2.23	52.4906	31.4529	52.8199	-28.5036	79.027	-17.652	0	-19.325	7.42	0	34.25	1.37	83.102	-15.314	0.406	-16.168	7.26	9.48	28.64	1.39	-0.0515647	0.0145985	0	GABA	Adapt. Npy	0	1	1	0
TG184	26	II-III	2.5	Fusiform	290.81	41.3	11.9	3.47059	88.31	2.13	-78.9491	327.9	21.0525	64.204	0.0971849	40	215.84	-2.87324	7.15747	2.77	114.894	30.4799	75.3376	-31.4159	87.88	-16.96	0	-17.6	6.46	0	19.68	0.92	87.26	-16.7	0	-18.61	5.38	0	22.2	1.01	0.00705508	0.0978261	0	GABA	Adapt. Npy	1	1	1	0
AK096	24.2	II-III	2.5	Fusiform	206.35	26.63	9.97	2.67101	63.9	1.574	-71.5608	553.3	45.5607	82.3436	0.133376	28.8295	76.8985	-1.51032	7.73292	10.5957	79.5585	25.4779	54.1839	-26.482	97.013	-12.28	0	-17.914	4.64	0	22.85	1.28	97.601	-10.864	0	-16.058	4.92	0	22.04	1.35	-0.00606104	0.0546875	0	GABA	Adapt. Npy	1	1	1	0
AK242	22.9	II-III	2.5	Fusiform	141.627	24.4902	8.66585	2.82606	55.9069	1.7562	-77.497	503.358	31.5576	62.6941	0.119081	18.7394	83.6811	-15.7266	10.066	3.14331	77.9567	18.0476	90.8749	-30.0955	97.759	-11.774	1.599	-12.36	4.03	8.24	20.11	1.15	95.076	-14.109	1.672	-14.899	4.51	7.05	20.98	1.19	0.027445	0.0347826	0	GABA	Adapt. Npy	0	0	1	0
AK110	25.2	I-II	1	Multipolar	133.65	19.1	9	2.12222	49.16	1.439	-73.6098	256.4	22.3846	87.3034	0.194977	49.5157	69.6602	2.62301	6.31137	4.358	107.996	25.9331	66.9355	-36.5155	100.275	-9.956	1.862	-12.488	3.33	7.78	38.59	0.99	99.106	-8.82	0.598	-12.231	4.52	6.49	34.95	1.09	0.0116579	0.10101	0	GABA	Adapt. Npy	0	1	1	0
AK074	25.2	II-III	2	Fusiform	103.82	16.91	7.86	2.1514	40.86	1.28	-67.6098	389.28	14.9236	38.3364	0.0605332	6.33854	159.141	-2.85002	9.75247	1.776	33.8611	20.1687	41.1412	-20.2879	85.914	-14.209	2.142	-12.347	4.62	10.64	13.41	1.19	82.904	-13.129	0	0	5.09	0	0	1.26	0.035035	0.0588235	0	GABA	Adapt. Npy	0	1	1	0
TG196	22	II-III	2.5	Fusiform	139.06	23.12	7.86	2.94148	53.7	1.65	-78.4528	515.7	42.5434	82.4964	0.0436568	28	220.16	-2.64146	7.07954	21.11	46.979	46.2806	36.2879	-7.59544	76.86	-5.02	2.29	-5.09	5.69	13.92	35.48	1.65	74.8	-5.43	1.34	-6.18	5.93	10.59	48.07	1.67	0.026802	0.0121212	0	GABA	Adapt. Npy	0	1	1	0
BC112	25.4	II-III	2.5	Round	121.939	14.0966	10.7409	1.31242	40.4298	1.06672	-81.6196	286	29.5128	103.192	0.147621	50.226	167.94	-7.47796	13.9064	20.361	98.3508	22.2896	31.9215	-9.16727	92.568	-7.489	0.47	-16.034	6.13	12.03	72.76	1.49	92.261	-9.387	0	-18.103	7.2	0	70.6	1.58	0.00331648	0.0604027	0	GABA	Adapt. Npy	0	1	1	0
AK095	23.3	II-III	2.5	Fusiform	n.d.	n.d.	n.d.	#VALUE!	n.d.	n.d.	-75.5166	604.46	41.2117	68.1794	0.0698688	18.6815	171.738	-1.04133	5.93085	9.60693	77.2669	19.2621	51.3853	-14.0168	98.71	-11.575	0.292	-16.742	6.29	6.64	28.04	1.35	96.247	-11.803	0.18	-17.462	5.87	6.3	24.67	1.37	0.0249519	0.0148148	0	GABA	Adapt. Npy	1	1	1	0
AK002	26.8	II	2	Multipolar	121.446	15.4237	11.1651	1.38142	44.5947	1.30309	-83.6883	214.85	27.7783	129.292	0.0922874	78.4993	147.82	-5.13604	5.2759	34.235	65.0541	19.5344	41.2928	-20.986	93.609	-7.3	0	-9.754	10.12	0	37.92	1.46	91.849	-7.688	0	-13.266	6.25	0	53.12	1.5	0.0188016	0.0273973	0	GABA	Adapt. Npy	1	1	1	0
BC211	33.6	II-III	2.5	Pyramidal	271.462	43.0567	14.2745	3.01633	99.6792	2.91267	-91.0219	248.982	26.3836	105.966	0.0938226	50.1689	350.364	-7.16167	7.49063	15.741	122.417	10.3611	55.7636	-34.29	117.792	-5.829	0	-14.975	4.1	0	23.94	0.96	113.739	-7.178	0	-16.241	5.13	0	22.39	1.06	0.0344081	0.104167	0	GABA	Adapt. Npy	1	1	1	1
AK261	23.2	II-III	2.5	Fusiform	133.049	24.2996	8.76941	2.77095	54.2153	1.75802	-75.5117	300.892	34.5074	114.684	0.210406	59.7305	165.402	-4.66753	6.60476	12.4939	51.1483	18.4228	23.86	-9.934	88.303	-7.184	0	-11.679	8.6	0	41.44	1.77	84.878	-6.158	0	-12.436	7.58	0	49.24	1.81	0.0387869	0.0225989	0	GABA	Adapt. Npy	1	1	1	1
BC129	26	III	3	Fusiform	134.38	18.91	9.2	2.05543	47.66	1.345	-78.6491	228.983	9.28083	40.5306	0.0900051	55.5084	87.9805	-6.10577	12.3181	1.41	88.7598	16.5356	98.2354	-28.8609	88.892	-11.31	0.238	-13.239	3.5	4.38	9.76	0.78	89.156	-10.707	0.147	-12.561	4.69	4.86	11	0.8	-0.0029699	0.025641	0	GABA	Adapt. Npy	0	0	1	1
AK076	24.7	II-III	2	Fusiform	174.32	24.54	9.28	2.6444	58.56	1.565	-75.5853	362.66	31.8137	87.7232	0.152363	37.0128	164.859	2.64661	7.51991	11.561	64.7684	36.9225	56.0771	-28.1543	83.679	-18.036	0	-18.439	7.2	0	18.08	1.22	85.212	-15.124	0	-15.649	5.1	0	19.5	1.3	-0.01832	0.0655738	0	GABA	Adapt. Npy	0	1	1	1
AK163	20.8	III-IV	3.5	Ovoid	148	18.22	10.56	1.72538	47.61	1.22	-72.394	196.28	22.1691	112.946	0.0782649	68.6697	163.262	-1.47279	3.69744	8.49609	85.8356	29.835	47.2413	-6.71194	96.385	-11.761	0	-15.442	5.59	0	28.87	1.14	91.332	-13.483	0	-18.182	5.62	0	26.75	1.19	0.0524252	0.0438596	0	GABA	Adapt. Npy	0	1	1	1
AK144	24.9	II-III	3.5	Fusiform	145.97	22.02	7.9	2.78734	55.74	1.69	-76.5951	476.4	24.8241	52.1077	0.0820092	39.7167	249.559	-4.07238	5.10367	19.9837	101.01	25.503	69.9085	-22.5668	93.648	-10.748	0.333	-12.817	4.51	5.56	29.07	1.07	93.011	-9.454	0.324	-11.45	4.43	5.34	24.48	1.1	0.00680207	0.0280374	0	GABA	Adapt. Npy	0	1	1	1
AK009	23	II-III	2.5	Inverted Pyr.	150.09	20.03	9.85	2.0335	52.88	1.483	-71.5019	300	20.7752	69.2507	0.113288	19.4404	166.199	5.34692	2.65351	14.978	113.154	22.083	75.7701	-26.5179	91.461	-16.113	0.671	-16.138	3.85	7.83	15.67	0.87	88.032	-17.816	0.128	-19.958	4.58	4.88	17.49	0.92	0.0374914	0.0574713	1	GABA	Adapt. Npy	1	1	1	1
AK029	24.1	II-III	2.5	Inverted Pyr.	220.45	24.72	11.4	2.16842	59.54	1.28	-81.5558	151.06	17.6179	116.628	0.11085	106.821	118.039	-6.47133	5.32866	13.118	127.934	20.2401	51.9522	-5.47278	90.294	-9.755	1.772	-11.517	3.87	7.69	24.36	0.95	83.968	-11.963	0	-16.917	4.39	0	15.09	1.11	0.07006	0.168421	0	GABA	Adapt. Npy	0	1	1	1
AK004	24	I-II	1.5	Inverted Pyr.	98.91	14.9	8.7	1.71264	40.39	1.313	-80.5509	255	20.2807	79.5322	0.0337017	40.7603	701.43	1.67918	5.94953	1.96	92.3938	22.367	59.0071	-17.4103	95.276	-16.071	0	-18.494	4.73	0	20.56	0.92	92.159	-15.228	0	-18.146	4.5	0	17.12	0.98	0.0327155	0.0652174	0	GABA	Adapt. Npy	0	1	1	1
AK174	22.8	IV	3	Fusiform	170.09	27.11	8.51	3.18566	60.7	1.723	-73.4921	197.4	18.3834	93.1277	0.125329	80	69.7615	-4.03211	4.15591	8.18	102.189	30.1491	51.0387	-9.68098	93.76	-12.866	0.512	-14.081	4.36	8.28	20.8	1.04	85.505	-14.618	0	-14.819	5.54	0	15.8	1.09	0.0880439	0.0480769	0	GABA	Adapt. Npy	0	1	1	0
AK165	23.2	III	3	Fusiform	159.08	28.17	9.99	2.81982	61.31	1.88	-77.5117	317.85	15.3276	48.2227	0.127417	59.57	61.1015	0.854813	6.95565	11.7187	113.083	28.4662	68.4786	-29.4227	94.501	-13.931	0.811	-21.537	3.42	5.16	22.88	0.84	91.028	-14.981	0.83	-19.897	3.41	4.75	19.33	0.86	0.0367509	0.0238095	0	GABA	Adapt. Npy	0	1	1	0
AK135	24.3	II	2	Multipolar	134.58	15.87	11.48	1.3824	43.36	1.11	-76.5657	207.81	18.3188	88.1517	0.130982	89.62	48.719	-2.31314	3.40113	8.331	83.7257	26.5444	61.4272	-21.2482	95.32	-9.472	0.25	-13.367	3.91	5.03	21.02	1	90.393	-13.116	0	-17.56	4.54	0	19.97	1.1	0.051689	0.1	0	GABA	Adapt. Npy	0	1	1	0
AK036	26.2	II-III	2	Multipolar	76.4	12.59	7.77	1.62033	33.46	1.166	-72.6589	249.175	20.3086	81.5034	0.185694	55.4988	17.59	1.82401	8.94861	9.613	93.4713	17.5176	54.1834	-22.4715	86.54	-10.353	0	-13.167	3.43	0	16.43	0.95	79.145	-14.378	0	-20.166	4.64	0	18.31	1.18	0.0854518	0.242105	0	GABA	Adapt. Npy	0	1	1	0
AK041	25.1	II-III	2.5	Inverted Pyr.	177.72	28.76	8.2	3.50732	66.81	1.999	-81.6049	193.12	16.8152	87.0713	0.0765627	116.131	68.7382	-0.99338	9.16319	12.161	118.607	19.5008	52.9453	-8.78236	90.1	-14.685	1.196	-15.448	3.62	6.89	20.09	0.79	84.176	-15.474	0	-19.022	4.08	0	13.99	0.9	0.0657492	0.139241	0	GABA	Adapt. Npy	1	1	1	0
AK016	23.5	II-III	2	Fusiform	129.99	19.44	8.58	2.26573	47.95	1.4078	-74.5264	235.9	17.8163	75.5248	0.0681445	42.7226	110.199	-4.01919	7.42828	15.07	153.617	22.5467	56.5815	-16.7407	92.957	-12.073	0.556	-13.3	3.9	8.13	24.75	0.84	91.113	-12.494	0.372	-13.751	5.47	6.29	15.21	0.88	0.0198371	0.047619	0	GABA	Adapt. Npy	1	1	1	0
AK003	23.6	I	1	Inverted Pyr.	125.38	15.96	10.92	1.46154	49.81	1.575	-80.5313	376.575	22.0984	58.6826	0.028813	60.5533	68.98	-1.65537	6.83273	4.359	73.1316	27.9636	53.8828	-25.3064	93.938	-17.194	0.995	-16.528	5.44	8.11	11.9	1.03	90.528	-18.787	0.409	-18.53	5.86	8.89	11.79	1.09	0.0363005	0.0582524	0	GABA	Adapt. Npy	1	1	1	0
AK160	21.8	II	2	Fusiform	149.53	20.93	9.04	2.31527	52.16	1.448	-71.443	302.725	22.4075	74.0193	0.11238	38.7971	134.059	-1.68004	6.26362	12.7136	58.3664	27.4559	38.1857	-6.48493	109.93	-19.706	0.377	-20.629	3.75	6.39	19.93	1.06	106.46	-21.138	0	-23.523	6.4	0	20.49	1.1	0.0315655	0.0377358	0	GABA	Adapt. Npy	0	1	1	0
AK051	24.7	II-III	2.5	Ovoid	115.029	14.99	9.72	1.54218	39.47	1.078	-77.5853	289.45	22.4488	77.5567	0.151457	59.41	60.2382	11.0627	4.05693	30.311	90.7961	17.9268	58.5638	-17.6906	98.768	-19.173	0.079	-19.696	7.17	7.87	14.7	0.99	89.213	-22.707	0	-24.816	4.49	0	11.62	1.09	0.0967419	0.10101	0	GABA	Adapt. Npy	0	1	1	0
AK034	25.2	II-III	2	Multipolar	163.61	21.63	9.87	2.19149	56.42	1.548	-76.6098	185.35	16.9987	91.7114	0.0787585	81.2088	462.379	-3.24097	6.62301	16.568	144.905	19.6972	55.9976	-7.19071	93.829	-15.405	0.165	-17.981	4.51	4.9	15.98	0.85	91.656	-17.798	0	-21.698	4.27	0	15.53	0.91	0.0231592	0.0705882	0	GABA	Adapt. Npy	0	0	1	0
AB014	23	II	2	Round	77.94	10.78	9.32	1.15665	32.67	1.0895	-83.5019	316	18.6269	58.9459	0.0434575	59.1726	274.92	8.05889	3.62237	8.66	85.03	26.8023	60.6554	-17.6031	95.78	-16.537	0	-20.78	4.83	0	17.84	0.99	94.841	-16.73	0	-21.961	4.57	0	22.09	1.02	0.00980372	0.030303	0	GABA	Adapt. Npy	0	1	1	0
AB011	24.3	I-II	1.5	Fusiform	112.44	17.83	8.25	2.16121	45.73	1.48	-78.5657	410.5	21.6864	52.8292	0.0130333	29.698	367.97	-1.8535	6.16313	9.14	109.775	23.0145	48.7808	-15.5864	94.71	-17.38	1.62	-16.57	3.75	8.54	15.42	0.91	90.52	-19.71	1.016	-20.29	4.9	5.4	16.28	0.98	0.0442403	0.0769231	0	GABA	Adapt. Npy	0	1	1	0
AK097	23.9	I-II	1.5	Inverted Pyr.	130.94	19.39	8.81	2.20091	47.48	1.37	-79.546	283.7	22.4033	78.9683	0.0760657	89.0106	43.84	2.83944	2.25154	1.392	52.2976	28.8564	37.2055	1.93906	75.93	-16.125	0	0	3.76	0	0	0.99	54.683	-24.121	0	0	7.62	0	0	1.38	0.279824	0.393939	0	GABA	Adapt. Npy	0	1	1	0
AK081	23.5	I	1	Ovoid	44.89	10.15	5.79	1.75302	26.03	1.201	-80.5264	592.1	42.4957	71.7712	0.0705757	27.6668	383.938	-3.71965	8.4782	3.08	55.824	33.8363	47.3263	-12.8785	79.055	-14.386	0	0	5.77	0	0	1.36	71.881	-17.92	0	0	7.88	0	0	1.63	0.0907469	0.198529	0	GABA	Adapt. Npy	0	1	1	0
AK080	23.3	I	1	Fusiform	54.42	11.82	5.82	2.03093	29.37	1.261	-82.5166	490.7	24.8648	50.6721	0.0300527	35.6239	457.99	-0.358907	6.79862	6.104	40.0679	50.3407	56.8362	-13.2489	54.937	-14.448	0	0	8.38	0	0	1.59	54.881	-16.545	0	0	7.37	0	0	1.71	0.00101935	0.0754717	0	GABA	Adapt. Npy	0	1	1	0
AK043	24	II-III	2	Fusiform	54.82	16.44	5.007	3.2834	35.47	1.826	-80.5509	243.6	26.7824	109.944	0.0591847	10	564.359	-3.7861	4.23511	5.164	97.2286	22.3067	49.1444	-9.23045	88.525	-10.846	0	0	4.51	0	0	1.07	84.318	-11.304	0	0	4.73	0	0	1.14	0.0475233	0.0654206	0	GABA	Adapt. Npy	0	1	1	0
AK020	24.8	II-III	2	Fusiform	176.54	22.53	10.07	2.23734	55.55	1.391	-84.5902	425.83	30.0419	70.549	0.045257	59.5552	69.5781	-5.59966	7.97975	1.9043	87.716	22.4755	55.4988	-24.0713	90.38	-12.793	0	0	3.6	0	0	0.88	82.104	-15.35	0	0	4.82	0	0	1.03	0.0915689	0.170455	0	GABA	Adapt. Npy	0	1	1	0
AK031	25.5	II-III	2.5	Round	83.63	11.44	9.08	1.25991	34.13	1.15	-70.6245	544.45	26.3188	48.3402	0.0391997	30.1797	256.18	-6.36651	13.7926	9.332	72.4604	18.6978	51.6654	-12.4978	71.933	-26.303	0	0	5.19	0	0	1.17	67.2999	-28.419	0	0	4.8	0	0	1.24	0.0644085	0.0598291	0	GABA	Adapt. Npy	0	1	1	1
BC213	22.5	I	1	Round	110.476	13.1696	10.8936	1.20893	37.81	1.02976	-66.5221	722.5	21.0119	29.0822	0.140786	9.56379	48.9406	-2.36408	4.71453	5.12085	86.4195	26.0154	61.0547	-4.11168	86.579	-27.509	0	0	4.48	0	0	1.12	84.177	-27.725	0	0	5.03	0	0	1.16	0.0277434	0.0357143	0	GABA	Adapt. Npy	0	1	1	1
AK001	25.2	I	1	Round	70.178	11.091	8.104	1.36858	30.87	1.0803	-76.6098	415	24.6	59.2771	0.0404624	54.5065	72.3202	-0.173985	7.695	6.836	77.4092	32.505	46.4158	-13.3226	90.424	-18.823	0	0	4.52	0	0	0.99	85.491	-20.367	0	0	7.2	0	0	1.05	0.0545541	0.0606061	0	GABA	Adapt. Npy	0	1	0	1
AL017	25.8	II-III	2.5	Ovoid	131.132	18.2136	9.67339	1.88286	45.7668	1.27111	-74.6392	322.621	19.9622	61.875	0.077293	33.8816	347.424	-3.5949	9.69619	1.33667	89.7365	25.9676	79.1044	-29.8634	76.69	-21.861	0	0	6.79	0	0	0.96	76.18	-19.165	0	-19.843	4.98	0	9.44	0.98	0.00665015	0.0208333	0	GABA	Adapt. Npy	1	1	1	0
AL008	22.2	II	2	Pyriform	99.128	20.6055	8.53592	2.41397	47.5352	1.81395	-70.4626	335.21	16.1393	48.147	0.0771036	69.3986	221.97	-1.46965	8.42012	4.10461	66.1224	29.8463	60.1843	-28.2779	75.56	-12.01	0	0	4.15	0	0	1.25	74.45	-14.87	0	0	5.15	0	0	1.49	0.0146903	0.192	0	GABA	Adapt. Npy	1	1	0	0
AK007	25.3	I	1	Round	106.028	13.52	10.25	1.31902	43.93	1.448	-83.6147	490	22.4497	45.8157	0.103769	41.2251	92.9005	-14.7908	13.1112	7.556	73.3265	29.4631	57.7788	-18.5636	83.339	-14.775	0	0	5.52	0	0	1.15	81.308	-14.386	0	0	5.57	0	0	1.16	0.0243703	0.00869565	0	GABA	Adapt. Npy	1	1	1	0
AL016	23.5	I	1	Pyriform	122.269	17.8305	9.82623	1.81458	44.3261	1.27877	-75.5264	474.574	21.6778	45.6784	0.0986366	14.2795	92.6012	1.83218	3.91717	2.00195	95.2724	18.591	92.6706	-16.98	87.836	-27.777	0	0	4.31	0	0	0.81	84.849	-29.563	0	0	5.73	0	0	0.84	0.0340066	0.037037	0	GABA	Adapt. Npy	0	1	1	0
AL014	24.8	II	2	Round	105.803	14.0873	10.349	1.36123	38.125	1.09323	-70.5902	359.387	20.6706	57.5164	0.0898786	19.1349	39.0805	3.59786	4.35778	2.20947	79.4866	23.5298	80.6723	-30.7742	83.077	-25.574	0	0	4.75	0	0	0.97	80.882	-27.496	0	0	6.32	0	0	1.04	0.0264213	0.0721649	0	GABA	Adapt. Npy	0	1	1	0
AB010	23.7	I	1	Ovoid	114.93	15.41	7.8	1.97564	42.99	1.28	-72.5362	535.5	36.9677	69.034	0.0861185	29.4394	111.762	13.4452	2.17116	7.64	76.4004	24.5222	51.2132	-24.9779	88.31	-24.43	0	0	4.33	0	8.38	0.96	84.43	-24.4	0	-26.1	4.62	0	13.51	1.01	0.0439361	0.0520833	0	GABA	Adapt. Npy	0	1	0	0
[truncated: 12 more columns]
