# Supplementary material for: Lactate is an energy substrate for rodent cortical neurons and enhances their firing activity
Source: eLife. 2021 Nov 12;10:e71424. doi: 10.7554/eLife.71424 (PMC8651295; doi:10.7554/eLife.71424)
Supplement: Figure 1—source data 4. [file elife-71424-fig1-data4.xls]

## Sheet: Feuil1
																							Kcnj8			Kcnj11			Abcc8			Abcc9
		RS							Kcnj8		Kcnj11		Abcc8		Abcc9				k \ a=	0.05	0.01	0.001	Comparison		p=	Comparison		p=	Comparison		p=	Comparison		p=
		Kcnj8	Kcnj11	Abcc8	Abcc9				RS	IB	RS	IB	RS	IB	RS	IB			1	0.00238095	0.00047619	4.7619e-05	RS	IB	N/A	Adapting-Npy	FS-Pvalb	0.049	Bursting-Vip	Adapting-Vip	0.2524	RS	IB	N/A
		0	0.291667	0.126984	0			n (positive)=	0	0	14	1	8	0	0	0			2	0.0025	0.0005	5e-05	RS	Bursting-Vip	N/A	Adapting-Sst	FS-Pvalb	0.1066	RS	Adapting-Vip	0.366	RS	Bursting-Vip	N/A
	N=	63	48	63	63			n (negative)=	63	10	34	8	55	10	63	10			3	0.00263158	0.000526316	5.26316e-05	RS	Adapting-Vip	N/A	Bursting-Vip	Adapting-Npy	0.115	Adapting-Vip	Adapting-Npy	0.5214	RS	Adapting-Vip	N/A
	n (positive)=	0	14	8	0			p exact Fisher, bilatéral	N/A		0.4198		0.5884		N/A				4	0.00277778	0.000555556	5.55556e-05	RS	Adapting-Sst	N/A	RS	FS-Pvalb	0.1235	IB	Bursting-Vip	0.5571	RS	Adapting-Sst	N/A
	n (negative)=	63	34	55	63														5	0.00294118	0.000588235	5.88235e-05	RS	Adapting-Npy	0.4706	Bursting-Vip	Adapting-Sst	0.1868	IB	FS-Pvalb	0.5665	RS	Adapting-Npy	N/A
									Kcnj8		Kcnj11		Abcc8		Abcc9				6	0.003125	0.000625	6.25e-05	RS	FS-Pvalb	N/A	IB	Adapting-Npy	0.2533	IB	Adapting-Npy	0.5796	RS	FS-Pvalb	N/A
		IB							RS	Bursting-Vip	RS	Bursting-Vip	RS	Bursting-Vip	RS	Bursting-Vip			7	0.00333333	0.000666667	6.66667e-05	IB	Bursting-Vip	N/A	RS	Bursting-Vip	0.2631	RS	IB	0.5884	IB	Bursting-Vip	N/A
		Kcnj8	Kcnj11	Abcc8	Abcc9			n (positive)=	0	0	14	4	8	4	0	0			8	0.00357143	0.000714286	7.14286e-05	IB	Adapting-Vip	N/A	Adapting-Vip	Adapting-Npy	0.2893	Bursting-Vip	Adapting-Sst	0.6713	IB	Adapting-Vip	N/A
		0	0.111111	0	0			n (negative)=	63	27	34	21	55	23	63	27			9	0.00384615	0.000769231	7.69231e-05	IB	Adapting-Sst	N/A	IB	Adapting-Sst	0.383	Adapting-Vip	FS-Pvalb	0.7078	IB	Adapting-Sst	N/A
	N=	10	9	10	10			p exact Fisher, bilatéral	N/A		0.2631		0.7472		N/A				10	0.00416667	0.000833333	8.33333e-05	IB	Adapting-Npy	1	Adapting-Vip	Adapting-Sst	0.4022	Bursting-Vip	FS-Pvalb	0.7091	IB	Adapting-Npy	N/A
	n (positive)=	0	1	0	0														11	0.00454545	0.000909091	9.09091e-05	IB	FS-Pvalb	N/A	Adapting-Vip	FS-Pvalb	0.4181	RS	Adapting-Sst	0.7201	IB	FS-Pvalb	N/A
	n (negative)=	10	8	10	10														12	0.005	0.001	0.0001	Bursting-Vip	Adapting-Vip	N/A	RS	IB	0.4198	Bursting-Vip	Adapting-Npy	0.7211	Bursting-Vip	Adapting-Vip	N/A
									Kcnj8		Kcnj11		Abcc8		Abcc9				13	0.00555556	0.00111111	0.000111111	Bursting-Vip	Adapting-Sst	N/A	Bursting-Vip	Adapting-Vip	0.5615	RS	Bursting-Vip	0.7472	Bursting-Vip	Adapting-Sst	N/A
		Bursting-Vip							RS	Adapting-Vip	RS	Adapting-Vip	RS	Adapting-Vip	RS	Adapting-Vip			14	0.00625	0.00125	0.000125	Bursting-Vip	Adapting-Npy	1	RS	Adapting-Vip	0.654	RS	Adapting-Npy	0.783	Bursting-Vip	Adapting-Npy	N/A
		Kcnj8	Kcnj11	Abcc8	Abcc9			n (positive)=	0	0	14	13	8	4	0	0			15	0.00714286	0.00142857	0.000142857	Bursting-Vip	FS-Pvalb	N/A	IB	Adapting-Vip	0.67	RS	FS-Pvalb	1	Bursting-Vip	FS-Pvalb	N/A
		0	0.16	0.148148	0			n (negative)=	63	59	34	42	55	55	63	59			16	0.00833333	0.00166667	0.000166667	Adapting-Vip	Adapting-Sst	N/A	RS	Adapting-Npy	0.6714	IB	Adapting-Vip	1	Adapting-Vip	Adapting-Sst	N/A
	N=	27	25	27	27			p exact Fisher, bilatéral	N/A		0.654		0.366		N/A				17	0.01	0.002	0.0002	Adapting-Vip	Adapting-Npy	0.487	RS	Adapting-Sst	0.7845	IB	Adapting-Sst	1	Adapting-Vip	Adapting-Npy	N/A
	n (positive)=	0	4	4	0														18	0.0125	0.0025	0.00025	Adapting-Vip	FS-Pvalb	N/A	IB	Bursting-Vip	1	Adapting-Vip	Adapting-Sst	1	Adapting-Vip	FS-Pvalb	N/A
	n (negative)=	27	21	23	27				Kcnj8		Kcnj11		Abcc8		Abcc9				19	0.0166667	0.00333333	0.000333333	Adapting-Sst	Adapting-Npy	1	IB	FS-Pvalb	1	Adapting-Sst	Adapting-Npy	1	Adapting-Sst	Adapting-Npy	N/A
									RS	Adapting-Sst	RS	Adapting-Sst	RS	Adapting-Sst	RS	Adapting-Sst			20	0.025	0.005	0.0005	Adapting-Sst	FS-Pvalb	N/A	Bursting-Vip	FS-Pvalb	1	Adapting-Sst	FS-Pvalb	1	Adapting-Sst	FS-Pvalb	N/A
		Adapting-Vip						n (positive)=	0	0	14	8	8	2	0	0			21	0.05	0.01	0.001	Adapting-Npy	FS-Pvalb	1	Adapting-Sst	Adapting-Npy	1	Adapting-Npy	FS-Pvalb	1	Adapting-Npy	FS-Pvalb	N/A
		Kcnj8	Kcnj11	Abcc8	Abcc9			n (negative)=	63	24	34	15	55	22	63	24
		0	0.236364	0.0677966	0			p exact Fisher, bilatéral	N/A		0.7845		0.7201		N/A
	N=	59	55	59	59
	n (positive)=	0	13	4	0
	n (negative)=	59	42	55	59				Kcnj8		Kcnj11		Abcc8		Abcc9
									RS	Adapting-Npy	RS	Adapting-Npy	RS	Adapting-Npy	RS	Adapting-Npy
		Adapting-Sst						n (positive)=	0	1	14	18	8	6	0	0
		Kcnj8	Kcnj11	Abcc8	Abcc9			n (negative)=	63	55	34	35	55	50	63	56
		0	0.347826	0.0833333	0			p exact Fisher, bilatéral	0.4706		0.6714		0.783		N/A
	N=	24	23	24	24
	n (positive)=	0	8	2	0				Kcnj8		Kcnj11		Abcc8		Abcc9
	n (negative)=	24	15	22	24				RS	FS-Pvalb	RS	FS-Pvalb	RS	FS-Pvalb	RS	FS-Pvalb
								n (positive)=	0	0	14	5	8	4	0	0
		Adapting-Npy						n (negative)=	63	38	34	30	55	34	63	38
		Kcnj8	Kcnj11	Abcc8	Abcc9			p exact Fisher, bilatéral	N/A		0.1235		1		N/A
		0.0178571	0.339623	0.107143	0
	N=	56	53	56	56				Kcnj8		Kcnj11		Abcc8		Abcc9
	n (positive)=	1	18	6	0				IB	Bursting-Vip	IB	Bursting-Vip	IB	Bursting-Vip	IB	Bursting-Vip
	n (negative)=	55	35	50	56			n (positive)=	0	0	1	4	0	4	0	0
								n (negative)=	10	27	8	21	10	23	10	27
		FS-Pvalb						p exact Fisher, bilatéral	N/A		1		0.5571		N/A
		Kcnj8	Kcnj11	Abcc8	Abcc9
		0	0.142857	0.105263	0
	N=	38	35	38	38				Kcnj8		Kcnj11		Abcc8		Abcc9
	n (positive)=	0	5	4	0				IB	Adapting-Vip	IB	Adapting-Vip	IB	Adapting-Vip	IB	Adapting-Vip
	n (negative)=	38	30	34	38			n (positive)=	0	0	1	13	0	4	0	0
								n (negative)=	10	59	8	42	10	55	10	59
								p exact Fisher, bilatéral	N/A		0.67		1		N/A
									Kcnj8		Kcnj11		Abcc8		Abcc9
									IB	Adapting-Sst	IB	Adapting-Sst	IB	Adapting-Sst	IB	Adapting-Sst
								n (positive)=	0	0	1	8	0	2	0	0
		Total						n (negative)=	10	24	8	15	10	22	10	24
		Kcnj8	Kcnj11	Abcc8	Abcc9			p exact Fisher, bilatéral	N/A		0.383		1		N/A
		#NAME?	#NAME?	#NAME?	#NAME?
	N=	#NAME?	#NAME?	#NAME?	#NAME?
	n (positive)=	#NAME?	#NAME?	#NAME?	#NAME?				Kcnj8		Kcnj11		Abcc8		Abcc9
	n (negative)=	#NAME?	#NAME?	#NAME?	#NAME?				IB	Adapting-Npy	IB	Adapting-Npy	IB	Adapting-Npy	IB	Adapting-Npy
								n (positive)=	0	1	1	18	0	6	0	0
								n (negative)=	10	55	8	35	10	50	10	56
								p exact Fisher, bilatéral	1		0.2533		0.5796		N/A
									Kcnj8		Kcnj11		Abcc8		Abcc9
									IB	FS-Pvalb	IB	FS-Pvalb	IB	FS-Pvalb	IB	FS-Pvalb
								n (positive)=	0	0	1	5	0	4	0	0
								n (negative)=	10	38	8	30	10	34	10	38
								p exact Fisher, bilatéral	N/A		1		0.5665		N/A
									Kcnj8		Kcnj11		Abcc8		Abcc9
									Bursting-Vip	Adapting-Vip	Bursting-Vip	Adapting-Vip	Bursting-Vip	Adapting-Vip	Bursting-Vip	Adapting-Vip
								n (positive)=	0	0	4	13	4	4	0	0
								n (negative)=	27	59	21	42	23	55	27	59
								p exact Fisher, bilatéral	N/A		0.5615		0.2524		N/A
									Kcnj8		Kcnj11		Abcc8		Abcc9
									Bursting-Vip	Adapting-Sst	Bursting-Vip	Adapting-Sst	Bursting-Vip	Adapting-Sst	Bursting-Vip	Adapting-Sst
								n (positive)=	0	0	4	8	4	2	0	0
								n (negative)=	27	24	21	15	23	22	27	24
								p exact Fisher, bilatéral	N/A		0.1868		0.6713		N/A
									Kcnj8		Kcnj11		Abcc8		Abcc9
									Bursting-Vip	Adapting-Npy	Bursting-Vip	Adapting-Npy	Bursting-Vip	Adapting-Npy	Bursting-Vip	Adapting-Npy
								n (positive)=	0	1	4	18	4	6	0	0
								n (negative)=	27	55	21	35	23	50	27	56
								p exact Fisher, bilatéral	1		0.115		0.7211		N/A
									Kcnj8		Kcnj11		Abcc8		Abcc9
									Bursting-Vip	FS-Pvalb	Bursting-Vip	FS-Pvalb	Bursting-Vip	FS-Pvalb	Bursting-Vip	FS-Pvalb
								n (positive)=	0	0	4	5	4	4	0	0
								n (negative)=	27	38	21	30	23	34	27	38
								p exact Fisher, bilatéral	N/A		1		0.7091		N/A
									Kcnj8		Kcnj11		Abcc8		Abcc9
									Adapting-Vip	Adapting-Sst	Adapting-Vip	Adapting-Sst	Adapting-Vip	Adapting-Sst	Adapting-Vip	Adapting-Sst
								n (positive)=	0	0	13	8	4	2	0	0
								n (negative)=	59	24	42	15	55	22	59	24
								p exact Fisher, bilatéral	N/A		0.4022		1		N/A
									Kcnj8		Kcnj11		Abcc8		Abcc9
									Adapting-Vip	Adapting-Npy	Adapting-Vip	Adapting-Npy	Adapting-Vip	Adapting-Npy	Adapting-Vip	Adapting-Npy
								n (positive)=	0	1	13	18	4	6	0	0
								n (negative)=	59	55	42	35	55	50	59	56
								p exact Fisher, bilatéral	0.487		0.2893		0.5214		N/A
									Kcnj8		Kcnj11		Abcc8		Abcc9
									Adapting-Vip	FS-Pvalb	Adapting-Vip	FS-Pvalb	Adapting-Vip	FS-Pvalb	Adapting-Vip	FS-Pvalb
								n (positive)=	0	0	13	5	4	4	0	0
								n (negative)=	59	38	42	30	55	34	59	38
								p exact Fisher, bilatéral	N/A		0.4181		0.7078		N/A
									Kcnj8		Kcnj11		Abcc8		Abcc9
									Adapting-Sst	Adapting-Npy	Adapting-Sst	Adapting-Npy	Adapting-Sst	Adapting-Npy	Adapting-Sst	Adapting-Npy
								n (positive)=	0	1	8	18	2	6	0	0
								n (negative)=	24	55	15	35	22	50	24	56
								p exact Fisher, bilatéral	1		1		1		N/A
									Kcnj8		Kcnj11		Abcc8		Abcc9
									Adapting-Sst	FS-Pvalb	Adapting-Sst	FS-Pvalb	Adapting-Sst	FS-Pvalb	Adapting-Sst	FS-Pvalb
								n (positive)=	0	0	8	5	2	4	0	0
								n (negative)=	24	38	15	30	22	34	24	38
								p exact Fisher, bilatéral	N/A		0.1066		1		N/A
									Kcnj8		Kcnj11		Abcc8		Abcc9
									Adapting-Npy	FS-Pvalb	Adapting-Npy	FS-Pvalb	Adapting-Npy	FS-Pvalb	Adapting-Npy	FS-Pvalb
								n (positive)=	1	0	18	5	6	4	0	0
								n (negative)=	55	38	35	30	50	34	56	38
								p exact Fisher, bilatéral	1		0.049		1		N/A
