# Supplementary material for: Lactate is an energy substrate for rodent cortical neurons and enhances their firing activity
Source: eLife. 2021 Nov 12;10:e71424. doi: 10.7554/eLife.71424 (PMC8651295; doi:10.7554/eLife.71424)
Supplement: Figure 2—figure supplement 1—source data 1. [file elife-71424-fig2-figsupp1-data1.xls]

## Sheet: Feuil1
	1st App.	2nd App	normalized G-KATP	1st App.	2nd App	normalized I-KATP	Condition
AK084	1330.99	1244.52	0.935038	37.0047	42.0578	1.13655	MnTMPyP
AK088	1061.96	571.579	0.538232	22.9255	13.7951	0.601738	MnTMPyP
AK089	488.263	354.398	0.725834	17.188	11.596	0.674653	MnTMPyP
AK098	827.896	308.951	0.373176	19.4823	14.8273	0.761066	MnTMPyP
TG151	3744.53	3343.67	0.892948	113.344	91.5418	0.807644	MnTMPyP
AK091	2410.71	1874.96	0.77776	58.4758	56.3297	0.963298	CTRL
AK092	2059.46	2504.98	1.21633	64.3851	64.8898	1.00784	CTRL
AK096	4064.62	3682.3	0.90594	99.5664	93.8467	0.942554	CTRL
AK213	3507.49	1354.37	0.386138	63.0166	35.8414	0.568761	CTRL
AK214	6592.38	6916.16	1.04911	146.003	170.762	1.16958	CTRL
AK215	781.138	595.805	0.76274	20.7384	10.7779	0.519707	CTRL
TG152	5624.63	6103.68	1.08517	149.611	173.418	1.15912	CTRL
	G-KATP (pS)			I-KATP (pA)
	MnTMPyP						CTRL
	n=	mean	sd	sem	Shapiro-Wilk Test (Normality)		n=	mean	sd	sem	Shapiro-Wilk Test (Normality)		Fisher Test (equality of variance)		Student t Test
					W	p value					W	p value	F	p value	t	DoF	p value
normalized G-KATP	5	0.693046	0.237634	0.106273	0.93291	0.61637	7	0.883313	0.274624	0.103798	0.94317	0.66744	1.33555	0.813505	1.24758	10	0.24061
normalized I-KATP	5	0.796331	0.206031	0.0921398	0.8846	0.3307	7	0.904409	0.261875	0.0989795	0.85475	0.13576	1.61556	0.668828	0.76559	10	0.46161
