# Supplementary material for: Lactate is an energy substrate for rodent cortical neurons and enhances their firing activity
Source: eLife. 2021 Nov 12;10:e71424. doi: 10.7554/eLife.71424 (PMC8651295; doi:10.7554/eLife.71424)
Supplement: Figure 2—source data 1. [file elife-71424-fig2-data1.xls]

## Sheet: Feuil1
cell #	Cell type	DR Ctrl	DR Pina	DR Diazo	DR Tolbut	DI Ctrl (pA)	DI Pina (pA)	DI Diazo (pA)	DI Tolbut (pA)
AK060	Adapt. Sst	0	0.019632	-0.251331	0.142509	0	7.64201	44.5642	7.20874
AK064	Burst. Vip	0	-0.0620668	-0.544348	-0.00273699	0	-14.1574	36.2907	-12.8066
AK066	Burst. Vip	0	-0.37967	-0.582407	-0.218325	0	-34.0388	-14.9671	-26.414
AK100	FS-Pvalb	0	-0.017449	-0.415308	0.00554035	0	-0.598892	148.475	-3.8257
AK103	Adapt. Npy	0	-0.0593167	-0.4676	0.143787	0	6.10198	58.1024	-4.57857
AK217	Adapt. Npy	0	0.0313247	-0.0987293	0.183987	0	3.01173	20.7769	-4.7494
AK218	Adapt. Npy	0	0.0166438	-0.00628518	0.215835	0	-0.941619	6.73161	-0.43342
AK219	RS	0	-0.0171413	0.00727505	0.19881	0	3.07015	5.84663	-3.23033
AK239	Adapt. Sst	0	-0.00820135	-0.334396	-0.0325203	0	0.640008	13.9679	-2.51583
AK265	Adapt. Npy	0	0.0262162	-0.404566	0.236894	0	-0.662855	97.0719	3.20657
AK266	RS	0	-0.27058	-0.350128	1.11361	0	45.0619	54.0112	-36.7289
AK267	Adapt. Npy	0	-0.0303077	-0.369051	0.224405	0	11.5505	78.9953	3.60973
AK269	RS	0	-0.300932	-0.419844	0.0526124	0	12.8752	12.8228	-17.8614
AK270	IB	0	-0.504204	-0.643363	0.0318848	0	21.5674	34.5333	0.0384676
AK271	FS-Pvalb	0	-0.0317057	-0.2284	0.279026	0	5.04177	32.638	-20.7384
AK272	Adapt. Sst	0	-0.0719928	-0.507534	0.26306	0	10.8047	102.458	13.2424
AK273	Adapt. Npy	0	-0.0390298	-0.368022	0.827525	0	1.99013	48.9515	-0.32054
TG176	FS-Pvalb	0	-0.0271627	-0.233643	0.0207253	0	-4.87337	29.0564	-12.5506
	mean	0	-0.0958857	-0.345427	0.204813	0	4.1158	45.0181	-6.63598
	s.e.m.	0	0.0379577	0.0446498	0.075269	0	3.78266	9.82817	3.02844
			DR (%)					DI (pA)
		n=	mean	sd	s.e.m.	Shapiro-Wilk Test (Normality)		mean	sd	s.e.m.	Shapiro-Wilk Test (Normality)
						W	p value				W	p value
	Ctrl	18	0	0	0	N/A	0	0	0	0	N/A	0
	Pina	18	-0.0958333	0.15658	0.0379577	0.73518	0.00021	4.1158	15.5963	3.78266	0.8925	0.0426
	Diazo	18	-0.345389	0.184045	0.0446498	0.95661	0.53765	45.0181	40.5226	9.82817	0.92861	0.18353
	Tolbut	18	0.204944	0.31042	0.075269	0.77899	0.00078	-6.63598	12.4866	3.02844	0.93615	0.2487
						Friedman's ANOVA					Friedman's ANOVA
						Chi² ANOVA (N = 18, DoF = 3) =	40.9333				Chi² ANOVA (N = 18, DoF = 3) =	32.6648
						p =	6.7556e-09				p =	3.79001e-07
	*	**	***			Dunn's test (uncorrected)					Dunn's test (uncorrected)
k \ a=	0.05	0.01	0.001	Comparison		Rank sum diff.	Individual p value		Comparison		Rank sum diff.	Individual p value
1	0.00833333	0.00166667	0.000166667	Diazo	Tolbut	-48	5.76324e-10		Diazo	Tolbut	42.5	4.09451e-08
2	0.01	0.002	0.0002	Ctrl	Diazo	32	3.60902e-05		Ctrl	Diazo	-31.5	4.76974e-05
3	0.0125	0.0025	0.00025	Pina	Tolbut	-28	0.000300598		Pina	Diazo	-26	0.000789113
4	0.0166667	0.00333333	0.000333333	Pina	Diazo	20	0.00982327		Pina	Tolbut	16.5	0.03316
5	0.025	0.005	0.0005	Ctrl	Tolbut	-16	0.0388671		Ctrl	Tolbut	11	0.15558
6	0.05	0.01	0.001	Ctrl	Pina	12	0.121335		Ctrl	Pina	-5.5	0.477675
