# Supplementary material for: Lactate is an energy substrate for rodent cortical neurons and enhances their firing activity
Source: eLife. 2021 Nov 12;10:e71424. doi: 10.7554/eLife.71424 (PMC8651295; doi:10.7554/eLife.71424)
Supplement: Figure 2—source data 2. [file elife-71424-fig2-data2.xls]

## Sheet: Feuil1
cell Id	Cell type	Cell group	G-KATP (pS)	D G-KATP	E-rev (mV)	K-ATP curent density (pA/pF)			RS						IB						Burst. Vip						Adapt. Vip						Adapt. Sst						Adapt. Npy						FS-Pvalb
AK011	RS	Glu	8732.67	0.722103	-97.1792	1.52713			n=	mean	sd	s.e.m.	Shapiro-Wilk Test (Normality)		n=	mean	sd	s.e.m.	Shapiro-Wilk Test (Normality)		n=	mean	sd	s.e.m.	Shapiro-Wilk Test (Normality)		n=	mean	sd	s.e.m.	Shapiro-Wilk Test (Normality)		n=	mean	sd	s.e.m.	Shapiro-Wilk Test (Normality)		n=	mean	sd	s.e.m.	Shapiro-Wilk Test (Normality)		n=	mean	sd	s.e.m.	Shapiro-Wilk Test (Normality)
AK219	RS	Glu	754.397	0.159771	-87.5415	0.0699433							W	p value					W	p value					W	p value					W	p value					W	p value					W	p value					W
AK266	RS	Glu	3922.27	0.69253	-102.187	0.73345		G-KATP (pS)	7	3211.19	2752.62	1123.75	0.84124	0.10204	2	867.425	208.75	208.75			9	1706.46	1327.29	469.269	0.93754	0.55627	17	1820.41	1231.55	307.887	0.82488	0.00454	7	1820.92	1112.03	453.986	0.91256	0.41389	15	2208.67	1570.3	419.68	0.85829	0.0228	6	3207.38	2720.73	1216.75	0.80077
AK269	RS	Glu	988.333	0.448842	-113.387	0.256446		D G-KATP	7	0.519	0.201	0.0822347	0.89896	0.3247	2	0.499	0.2193	0.219346			9	0.459	0.234	0.0828707	0.9287	0.46911	17	0.46	0.153	0.0382751	0.97041	0.82555	7	0.439	0.154	0.0627611	0.87616	0.20993	15	0.429	0.173	0.0461233	0.95085	0.53789	6	0.315	0.106	0.0474934	0.84973
TG057	RS	Glu	2886.29	0.514825		0.899143		E-rev (mV)	5	-101.717	10.014	5.0072	0.98317	0.95086	1	-113.722					4	-98.961	18.687	10.7887	0.87973	0.3375	13	-105.721	7.972	2.30121	0.85243	0.03065	5	-100.206	10.453	5.22654	0.9622	0.82324	11	-99.025	13.681	4.32617	0.94705	0.6065	5	-103.584	5.728	2.8641	0.85627
TG069	RS	Glu	1449.85	0.414476		0.571342		K-ATP curent density (pA/pF)	7	0.788	0.556	0.227101	0.93642	0.60674	2	0.645	0.4517	0.451686			9	0.839	0.579	0.204658	0.86718	0.11467	17	0.835	0.46	0.115089	0.94481	0.37978	7	0.519	0.287	0.117255	0.84427	0.10884	15	0.682	0.516	0.137907	0.91032	0.13695	6	1.079	0.667	0.298087	0.96382
TG151	RS	Glu	3744.53	0.683863	-108.291	1.45879
	RS	Mean	3211.19	0.519487	-101.717	0.788035
		s.e.m.	1123.75	0.0822347	5.0072	0.227101
		n=	7	7	5	7			Glu						GABA
									n=	mean	sd	s.e.m.	Shapiro-Wilk Test (Normality)		n=	mean	sd	s.e.m.	Shapiro-Wilk Test (Normality)		Fisher Test (equality of variance)		Student t Test			Mann-Whitney U Test
cell Id	Cell type	Cell group	G-KATP (pS)	D G-KATP	E-rev (mV)	K-ATP curent density (pA/pF)							W	p value					W	p value	F	p value	t	dof	p value	U	p value
AK270	IB	Glu	1015.03	0.654383	-113.722	0.964557		G-KATP (pS)	9	2690.36	2599.29	918.986	0.77408	0.01029	54	2063.44	1554.33	213.504	0.83529	0						233	0.85447
TG070	IB	Glu	719.816	0.344181		0.325776		D G-KATP	9	0.515	0.191	0.0675694	0.91447	0.34839	54	0.432	0.17	0.0233565	0.98423	0.69507	1.26328	0.564828	1.3256	61	0.189915
	IB	Mean	867.425	0.499282	-113.722	0.645166		E-rev (mV)	6	-103.718	10.21	4.56617	0.92192	0.51932	38	-102.064	11.141	1.83164	0.95809	0.1645	1.19071	0.939666	-0.341127	42	0.734709
		s.e.m.	208.75	0.219346		0.451686		K-ATP curent density (pA/pF)	9	0.756	0.511	0.180817	0.94401	0.62465	54	0.779	0.509	0.0699777	0.92485	0.00229						240	0.961509
		n=	2	2	1	2
cell Id	Cell type	Cell group	G-KATP (pS)	D G-KATP	E-rev (mV)	K-ATP curent density (pA/pF)
AK064	Burst. Vip	GABA	4286.05	0.543097	-84.3753	0.611214
AK066	Burst. Vip	GABA	1456.18	0.465771	-83.0045	0.259224
AK087	Burst. Vip	GABA	1023.7	0.513544	-106.686	0.598969
AK089	Burst. Vip	GABA	488.263	0.197585	-121.776	0.700584
BC111	Burst. Vip	GABA	3179.78	0.753686		1.57212
BC113	Burst. Vip	GABA	2075.98	0.743327		1.96878
BC115	Burst. Vip	GABA	1133.55	0.402164		0.910534
BC120	Burst. Vip	GABA	1678.63	0.492077		0.708782
BC127	Burst. Vip	GABA	36.0293	0.0241558		0.222639
	Burst. Vip	Mean	1706.46	0.45949	-98.9606	0.839205
		s.e.m.	469.269	0.0828707	10.7887	0.204658
		n=	9	9	4	9
cell Id	Cell type	Cell group	G-KATP (pS)	D G-KATP	E-rev (mV)	K-ATP curent density (pA/pF)
AK012	Adapt. Vip	GABA	2644.85	0.595462	-101.05	0.759186
AK065	Adapt. Vip	GABA	1090.67	0.375923	-116.935	1.4229
AK073	Adapt. Vip	GABA	1823.43	0.624887	-102.32	0.874999
AK084	Adapt. Vip	GABA	1330.99	0.431416	-103.356	0.729583
AK086	Adapt. Vip	GABA	3279.53	0.386549	-125.326	1.13594
AK091	Adapt. Vip	GABA	2410.71	0.509929	-100.801	1.42121
AK092	Adapt. Vip	GABA	2059.46	0.382694	-108.136	1.15524
AK098	Adapt. Vip	GABA	827.896	0.213722	-99.5604	0.376386
BC124	Adapt. Vip	GABA	1470.51	0.49699		0.817892
BC125	Adapt. Vip	GABA	1841.65	0.50603		0.555718
BC128	Adapt. Vip	GABA	455.127	0.210064		0.137911
BC131	Adapt. Vip	GABA	1383.4	0.518373	-100.455	0.404574
TG064	Adapt. Vip	GABA	1902.33	0.533211		0.787156
TG148	Adapt. Vip	GABA	1365.61	0.686552	-109.194	0.860213
TG149	Adapt. Vip	GABA	750.074	0.311002	-108.584	0.427632
TG152	Adapt. Vip	GABA	5624.63	0.733748	-102.141	1.91833
TG178	Adapt. Vip	GABA	686.055	0.305375	-96.5175	0.401723
	Adapt. Vip	Mean	1820.41	0.460113	-105.721	0.834505
		s.e.m.	307.887	0.0382751	2.30121	0.115089
		n=	17	17	13	17
cell Id	Cell type	Cell group	G-KATP (pS)	D G-KATP	E-rev (mV)	K-ATP curent density (pA/pF)
AK060	Adapt. Sst	GABA	1493.19	0.344715	-102.361	0.30451
AK088	Adapt. Sst	GABA	1061.96	0.289506	-94.2713	0.347142
AK090	Adapt. Sst	GABA	773.048	0.381795	-88.1858	0.249951
AK213	Adapt. Sst	GABA	3507.49	0.687735		0.734923
AK239	Adapt. Sst	GABA	629.806	0.312022	-100.107	0.302554
AK272	Adapt. Sst	GABA	2766.24	0.610101	-116.103	0.70796
BC121	Adapt. Sst	GABA	2514.72	0.444025		0.985744
	Adapt. Sst	Mean	1820.92	0.438557	-100.206	0.518969
		s.e.m.	453.986	0.0627611	5.22654	0.117255
		n=	7	7	5	7
cell Id	Cell type	Cell group	G-KATP (pS)	D G-KATP	E-rev (mV)	K-ATP curent density (pA/pF)
AK001	Adapt. Npy	GABA	510.382	0.154797	-119.89	0.461506
AK002	Adapt. Npy	GABA	2067.28	0.313221	-81.3283	0.130501
AK003	Adapt. Npy	GABA	1958.51	0.274637	-75.3713	0.0614446
AK076	Adapt. Npy	GABA	2106.63	0.537707	-98.6553	0.465191
AK096	Adapt. Npy	GABA	4064.62	0.638693	-98.9608	1.20916
AK103	Adapt. Npy	GABA	2726.13	0.534529	-102.776	0.85398
AK214	Adapt. Npy	GABA	6592.38	0.689901		1.70721
AK215	Adapt. Npy	GABA	781.138	0.355615		0.50429
AK217	Adapt. Npy	GABA	1048.87	0.238783	-103.232	0.616115
AK218	Adapt. Npy	GABA	734.457	0.182689	-86.0215	0.347671
AK265	Adapt. Npy	GABA	3192.49	0.518605	-106.076	1.65118
AK267	Adapt. Npy	GABA	2862.03	0.484689	-100.293	0.749587
AK273	Adapt. Npy	GABA	1790.71	0.654189	-116.667	0.910667
BC112	Adapt. Npy	GABA	1399.18	0.376027		0.0399423
TG071	Adapt. Npy	GABA	1295.26	0.480615		0.514387
	Adapt. Npy	Mean	2208.67	0.42898	-99.0246	0.681522
		s.e.m.	419.68	0.0461233	4.32617	0.137907
		n=	15	15	11	15
cell Id	Cell type	Cell group	G-KATP (pS)	D G-KATP	E-rev (mV)	K-ATP curent density (pA/pF)
AK100	FS-Pvalb	GABA	5517.91	0.418529	-103.482	2.10076
AK271	FS-Pvalb	GABA	1297.52	0.396729	-113.086	1.09666
TG061	FS-Pvalb	GABA	2021.37	0.249798		0.784773
TG176	FS-Pvalb	GABA	1684.67	0.249203	-98.5004	0.61767
TG179	FS-Pvalb	GABA	7650.55	0.408508	-103.126	1.58315
TG180	FS-Pvalb	GABA	1072.24	0.167798	-99.7253	0.289358
	FS-Pvalb	Mean	3207.38	0.315094	-103.584	1.07873
		s.e.m.	1216.75	0.0474934	2.8641	0.298087
		n=	6	6	5	6
			G-KATP (pS)	D G-KATP	E-rev (mV)	K-ATP curent density (pA/pF)
	Glu	Mean	2690.36	0.514997	-103.718	0.756286
		s.e.m.	918.986	0.0675694	4.56617	0.180817
		n=	9	9	6	9
	GABA	Mean	2063.44	0.432454	-102.064	0.779026
		s.e.m.	213.504	0.0233565	1.83164	0.0699777
		n=	54	54	38	54
[truncated: 5 more columns]
