# Supplementary material for: Lactate is an energy substrate for rodent cortical neurons and enhances their firing activity
Source: eLife. 2021 Nov 12;10:e71424. doi: 10.7554/eLife.71424 (PMC8651295; doi:10.7554/eLife.71424)
Supplement: Figure 3—source data 1. [file elife-71424-fig3-data1.xls]

## Sheet: Feuil1
Cell Id	Species	Strain	Layer	Digitized layer	IR morphology	Intron Sst	Slc17a7	Gads	Gad2	Gad1	Atp1a1	Atp1a2	Atp1a3	Kcnj11 (raw data)	Kcnj11	Abcc8
JP033	Mouse	C57/Bl6	II-III	2.5	pyramidal	1	1	0	0	0	0	0	1	1	ND	1
JP039	Mouse	C57/Bl6	II-III	2.5	pyramidal	0	1	0	0	0	1	1	1	1	1	0
JP040	Mouse	C57/Bl6	II-III	2.5	pyramidal	0	1	0	0	0	1	1	1	0	0	0
JP041	Mouse	C57/Bl6	II-III	2.5	pyramidal	0	1	0	0	0	1	0	1	0	0	1
JP042	Mouse	C57/Bl6	II	2	pyramidal	0	1	0	0	0	1	0	1	0	0	0
JP044	Mouse	C57/Bl6	II-III	2.5	pyramidal	1	1	0	0	0	0	0	0	0	0	0
JP045	Mouse	C57/Bl6	II-III	2.5	pyramidal	0	1	0	0	0	0	0	0	0	0	0
JP046	Mouse	C57/Bl6	II-III	2.5	pyramidal	0	1	0	0	0	0	1	0	0	0	0
JP048	Mouse	C57/Bl6	II-III	2.5	pyramidal	1	1	0	0	0	1	0	1	1	ND	0
JP049	Mouse	C57/Bl6	II-III	2.5	pyramidal	0	1	0	0	0	1	1	1	0	0	0
JP050	Mouse	C57/Bl6	II-III	2.5	pyramidal	0	1	0	0	0	1	0	1	0	0	0
JP051	Mouse	C57/Bl6	II-III	2.5	Pyramidal	0	1	0	0	0	1	0	1	0	0	0
JP052	Mouse	C57/Bl6	II-III	2.5	Pyramidal	1	1	0	0	0	1	0	1	0	0	1
JP054	Mouse	C57/Bl6	II-III	2.5	Pyramidal	1	1	0	0	0	1	1	1	0	0	0
JP055	Mouse	C57/Bl6	II	2	Pyramidal	1	1	0	0	0	1	1	1	0	0	0
JP057	Mouse	C57/Bl6	II-III	2.5	Pyramidal	0	1	0	0	0	1	1	1	1	1	0
JP058	Mouse	C57/Bl6	II-III	2.5	Pyramidal	0	1	0	0	0	1	0	1	0	0	0
JP059	Mouse	C57/Bl6	II-III	2.5	Pyramidal	0	1	0	0	0	1	1	1	0	0	0
JP062	Mouse	C57/Bl6	II-III	2.5	Pyramidal	0	1	0	0	0	1	0	1	0	0	0
JP064	Mouse	C57/Bl6	II-III	2.5	Pyramidal	0	1	0	0	0	1	1	0	0	0	0
JP065	Mouse	C57/Bl6	II-III	2.5	Pyramidal	0	1	0	0	0	1	1	0	0	0	0
JP067	Mouse	C57/Bl6	II	2	Pyramidal	0	1	0	0	0	1	1	1	0	0	0
JP068	Mouse	C57/Bl6	II	2	Pyramidal	0	1	0	0	0	1	1	1	0	0	0
JP069	Mouse	C57/Bl6	II-III	2.5	Pyramidal	1	1	0	0	0	0	0	1	1	ND	0
JP070	Mouse	C57/Bl6	II-III	2.5	Pyramidal	0	1	0	0	0	1	1	1	1	1	0
							1	0	0	0	0.8	0.52	0.8	0.24	0.136364	0.12
