# Supplementary material for: Lactate is an energy substrate for rodent cortical neurons and enhances their firing activity
Source: eLife. 2021 Nov 12;10:e71424. doi: 10.7554/eLife.71424 (PMC8651295; doi:10.7554/eLife.71424)
Supplement: Figure 3—source data 2. [file elife-71424-fig3-data2.xls]

## Sheet: scRT-PCR
Cell Id	Layer	Intron SOM	VGluT1	GADs	GAD65	GAD67	ATP1a1	ATP1a2	ATP1a3	Kir6.2 (raw data)	Kir6.2	SUR1
JP033	II-III	1	1	0	0	0	0	0	1	1	ND	1
JP039	II-III	0	1	0	0	0	1	1	1	1	1	0
JP040	II-III	0	1	0	0	0	1	1	1	0	0	0
JP041	II-III	0	1	0	0	0	1	0	1	0	0	1
JP042	II	0	1	0	0	0	1	0	1	0	0	0
JP044	II-III	1	1	0	0	0	0	0	0	0	0	0
JP045	II-III	0	1	0	0	0	0	0	0	0	0	0
JP046	II-III	0	1	0	0	0	0	1	0	0	0	0
JP048	II-III	1	1	0	0	0	1	0	1	1	ND	0
JP049	II-III	0	1	0	0	0	1	1	1	0	0	0
JP050	II-III	0	1	0	0	0	1	0	1	0	0	0
JP051	II-III	0	1	0	0	0	1	0	1	0	0	0
JP052	II-III	1	1	0	0	0	1	0	1	0	0	1
JP054	II-III	1	1	0	0	0	1	1	1	0	0	0
JP055	II	1	1	0	0	0	1	1	1	0	0	0
JP057	II-III	0	1	0	0	0	1	1	1	1	1	0
JP058	II-III	0	1	0	0	0	1	0	1	0	0	0
JP059	II-III	0	1	0	0	0	1	1	1	0	0	0
JP062	II-III	0	1	0	0	0	1	0	1	0	0	0
JP064	II-III	0	1	0	0	0	1	1	0	0	0	0
JP065	II-III	0	1	0	0	0	1	1	0	0	0	0
JP067	II	0	1	0	0	0	1	1	1	0	0	0
JP068	II	0	1	0	0	0	1	1	1	0	0	0
JP069	II-III	1	1	0	0	0	0	0	1	1	ND	0
JP070	II-III	0	1	0	0	0	1	1	1	1	1	0

## Sheet: Bar plot
Cell Id	Strain	Iwashout @- 50 mV (pA)			Iwashout @- 50 mV (pA)			Shapiro-Wilk Test (Normality)		Mann-Whitney U Test
IN100310p01	C57/Bl6	6.59125			n=	mean	s.e.m.	W	p value	U	p value
IN100310p02	C57/Bl6	85.5216		C57/Bl6	26	46.7401	19.0274	0.8798	0.0057	78	2.42216e-06
IN100310p03	C57/Bl6	127.976		Kcnj11 KO	22	-59.8549	11.9306	0.9698	0.7057
IN100310p04	C57/Bl6	30.909
IN100310p05	C57/Bl6	49.4251			Iwashout @- 50 mV (pA)
IN100310p06	C57/Bl6	3.71491			median	n >0	n <0	median	n >0	n <0	Ch-2	DoF	p value
IN100310p07	C57/Bl6	-35.2391		C57/Bl6	16.15	19	7	0	13	13	5.53846	1	0.018604
IN110310p01	C57/Bl6	-40.4663		Kcnj11 KO	-61.9123	2	20	0	11	11	14.7273	1	0.000124
IN110310p02	C57/Bl6	1.64			observed			theoretical
IN110310p03	C57/Bl6	209
IN110310p04	C57/Bl6	24.4
IN120310p01	C57/Bl6	21.2
IN120310p02	C57/Bl6	190
IN120310p03	C57/Bl6	-99.1
IN120310p04	C57/Bl6	262
IN120310p05	C57/Bl6	-41.6
IN120310p06	C57/Bl6	263
IN120310p07	C57/Bl6	43.5
IN120310p08	C57/Bl6	-62.9
IN120310p09	C57/Bl6	157
IN120310p10	C57/Bl6	11.1
IN180310p01	C57/Bl6	8.5355
IN180310p02	C57/Bl6	27.1066
IN180310p04	C57/Bl6	-16.4416
IN180310p05	C57/Bl6	-14.2584
IN180310p07	C57/Bl6	2.62902
INKir6KO150310p01	Kcnj11 KO	33.3888
INKir6KO150310p02	Kcnj11 KO	-39.5
INKir6KO150310p03	Kcnj11 KO	-63.2
INKir6KO150310p04	Kcnj11 KO	-179
INKir6KO150310p05	Kcnj11 KO	81.1
INKir6KO150310p06	Kcnj11 KO	-0.129
INKir6KO150310p07	Kcnj11 KO	-40.9209
INKir6KO150310p08	Kcnj11 KO	-35.5134
INKir6KO150310p09	Kcnj11 KO	-66.3075
INKir6KO150310p10	Kcnj11 KO	-110.444
INKir6KO160310p01	Kcnj11 KO	-111.683
INKir6KO160310p02	Kcnj11 KO	-60.6247
INKir6KO160310p03	Kcnj11 KO	-83.0007
INKir6KO160310p04	Kcnj11 KO	-95.2236
INKir6KO160310p05	Kcnj11 KO	-24.5659
INKir6KO160310p06	Kcnj11 KO	-33.8288
INKir6KO160310p07	Kcnj11 KO	-35.4037
INKir6KO160310p08	Kcnj11 KO	-101.454
INKir6KO160310p09	Kcnj11 KO	-132.554
INKir6KO160310p10	Kcnj11 KO	-82.8419
INKir6KO170310p01	Kcnj11 KO	-47.5341
INKir6KO190310p02	Kcnj11 KO	-87.5669
