# Supplementary material for: Lactate is an energy substrate for rodent cortical neurons and enhances their firing activity
Source: eLife. 2021 Nov 12;10:e71424. doi: 10.7554/eLife.71424 (PMC8651295; doi:10.7554/eLife.71424)
Supplement: Figure 4—source data 1. [file elife-71424-fig4-data1.xls]

## Sheet: Feuil1
cell Id	Cell type	R Ctrl	R Tolbut	R Diazo	D R Ctrl	D R Tolbut	D R Diazo	D R KATP (%)	Vm Ctrl	Vm Tolbut	Vm Diazo	D Vm Ctrl (mV)	D VmTolbut (mV)	D Vm Diazo (mV)	D Vm KATP (mV)	Firing rate Ctrl	Max. Firing rate Tolbut	Firing rate Diazo	D F TCtrl (Hz)	D F Tolbut (Hz)	D F Diazo Hz)	D F KATP (Hz)	K-ATP Resposivness
AB005	RS	266.74	454.204	106.956	0	187.464	-159.784	3.24665	-64.5943	-59.1171	-76.8098	0	5.47722	-12.2155	17.6927	0	1.83977	0.0161454	0	1.83977	0.0161454	1.82363	Responsive			Responsive
AB006	Adapt. Vip	247.06	409.934	112.443	0	162.874	-134.617	2.6457	-74.2304	-65.7167	-76.2692	0	8.51371	-2.03877	10.5525	0	0.775081	0	0	0.775081	0	0.775081	Responsive			Responsive
AB007	RS	172.907	268.633	81.6899	0	95.7266	-91.2167	2.28845	-59.1326	-51.8689	-62.426	0	7.26364	-3.29344	10.5571	0.0968948	3.87335	0	0	3.77646	-0.0968948	3.87335	Responsive			Responsive
AB008	FS-Pvalb	136.362	137.749	117.704	0	1.38638	-18.6585	0.1703	-67.4739	-67.1337	-73.6592	0	0.340214	-6.18531	6.52552	0	0.096876	0	0	0.096876	0	0.096876	Responsive			Responsive
AB020	Adapt. Npy	377.775	447.177	305.436	0	69.4019	-72.3383	0.464058	-68.6441	-64.3469	-73.5991	0	4.29726	-4.95501	9.25227	0	0	0	0	0	0	0	Responsive			Responsive
AB022	Adapt. Sst	207.393	323.269	87.5285	0	115.876	-119.864	2.6933	-69.9347	-68.145	-80.5771	0	1.78966	-10.6424	12.4321	0	0	0.0484351	0	0	0.0484351	-0.0484351	Responsive			Responsive
AK078	Adapt. Vip	155.051	182.728	84.6272	0	27.6773	-70.4234	1.15921	-63.1593	-62.9466	-64.5486	0	0.212648	-1.38937	1.60202	0	0.193827	0.0775191	0	0.193827	0.0775191	0.116308	Responsive			Responsive
AK177	Adapt. Vip	609.172	630.707	518.667	0	21.5345	-90.5055	0.216015	-60.9923	-57.1389	-66.627	0	3.85342	-5.63469	9.48811	0.0198023	0.029706	0	0	0.00990367	-0.0198023	0.029706	Responsive			Responsive
AK178	Adapt. Npy	254.521	393.7	292.612	0	139.179	38.0908	0.345469	-62.169	-51.069	-63.6234	0	11.1	-1.45443	12.5544	0	2.06292	0	0	2.06292	0	2.06292	Responsive			Responsive
AK179	RS	265.835	318.853	155.181	0	53.0178	-110.655	1.05472	-67.8122	-55.0482	-67.6623	0	12.764	0.14984	12.6142	0	0.302801	0	0	0.302801	0	0.302801	Responsive			Responsive
AK180	Adapt. Vip	399.881	413.386	388.13	0	13.505	-11.7508	0.0650706	-68.1892	-71.3276	-70.2641	0	-3.13843	-2.07497	-1.06346	0	0	0	0	0	0	0	Not Responsive			Not Responsive
AK181	Adapt. Vip	294.087	314.404	227.893	0	20.3178	-66.1936	0.379614	-70.864	-69.7832	-75.2184	0	1.08079	-4.3544	5.43519	0	0	0	0	0	0	0	Responsive			Responsive
AK182	Adapt. Npy	208.783	210.714	154.077	0	1.93032	-54.7064	0.367587	-66.8759	-66.4738	-70.5239	0	0.4021	-3.648	4.0501	0	0	0	0	0	0	0	Responsive			Responsive
AK183	Adapt. Vip	417.898	514.861	306.743	0	96.9635	-111.155	0.67848	-68.9001	-67.1989	-79.4334	0	1.7012	-10.5333	12.2345	0	0	0	0	0	0	0	Responsive			Responsive
AK184	Adapt. Sst	317.52	282.94	192.712	0	-34.5801	-124.808	0.468203	-70.3617	-70.9921	-71.1615	0	-0.63037	-0.799744	0.169374	0	0	0	0	0	0	0	Responsive			Responsive
AK185	Burst. Vip	593.646	577.407	539.468	0	-16.2387	-54.1777	0.0703268	-70.3534	-70.0372	-69.753	0	0.3162	0.600441	-0.284241	0	0	0	0	0	0	0	Not Responsive			Not Responsive
AK186	Adapt. Sst	645.54	693.87	605.474	0	48.3305	-40.0662	0.145996	-70.1896	-71.1846	-75.283	0	-0.994937	-5.09332	4.09838	0	0	0	0	0	0	0	Responsive			Responsive
AK189	Adapt. Sst	439.607	497.203	522.272	0	57.5955	82.6651	-0.0480011	-64.0195	-62.7761	-70.5554	0	1.24342	-6.53589	7.77932	0	0.20199	0	0	0.20199	0	0.20199	Not Responsive			Not Responsive
AK191	Adapt. Sst	262.798	286.718	200.794	0	23.9192	-62.0041	0.427917	-60.2217	-52.6352	-63.23	0	7.58655	-3.00825	10.5948	0.0168342	1.0101	0	0	0.993267	-0.0168342	1.0101	Responsive			Responsive
AK192	RS	501.776	412.572	369.018	0	-89.204	-132.759	0.118029	-73.5392	-61.8788	-77.1233	0	11.6604	-3.58414	15.2445	0	0	0	0	0	0	0	Responsive			Responsive
AK193	FS-Pvalb	191.498	190.538	195.564	0	-0.959797	4.06667	-0.0257023	-61.6028	-63.7797	-66.5307	0	-2.1769	-4.92789	2.751	0	0	0	0	0	0	0	Not Responsive			Not Responsive
AK194	Adapt. Sst	251.596	291.651	193.682	0	40.0547	-57.9142	0.505822	-52.606	-56.3022	-65.6182	0	-3.6962	-13.0123	9.31608	3.61924	0.302954	0	0	-3.31628	-3.61924	0.302954	Responsive			Responsive
AK196	RS	216.278	225.516	213.707	0	9.23783	-2.5709	0.0552566	-73.0421	-73.3442	-77.3286	0	-0.302064	-4.28646	3.9844	0	0	0	0	0	0	0	Responsive			Responsive
AK197	Adapt. Vip	639.482	668.534	736.092	0	29.052	96.6105	-0.0917798	-60.4781	-60.6641	-57.7369	0	-0.185989	2.74129	-2.92728	0.100393	0.502311	0.117108	0	0.401917	0.0167151	0.385202	Not Responsive			Not Responsive
AK198	Adapt. Vip	338.34	337.198	250.459	0	-1.14199	-87.8811	0.346321	-68.8598	-67.0431	-73.6567	0	1.81668	-4.79689	6.61357	0	0	0	0	0	0	0	Responsive			Responsive
AK199	Adapt. Vip	260.149	412.705	287.747	0	152.556	27.5982	0.434262	-65.9011	-55.0639	-64.249	0	10.8372	1.65213	9.1851	0	1.70657	0	0	1.70657	0	1.70657	Responsive			Responsive
AK200	Burst. Vip	533.846	576.213	363.37	0	42.367	-170.476	0.585746	-73.0149	-63.2953	-78.479	0	9.71967	-5.46408	15.1838	0	3.31342	0	0	3.31342	0	3.31342	Responsive			Responsive
AK201	Adapt. Sst	449.043	730.327	189.378	0	281.284	-259.665	2.85645	-75.3544	-68.534	-82.455	0	6.82035	-7.10068	13.921	0	0.0836646	0	0	0.0836646	0	0.0836646	Responsive			Responsive
AK203	RS	291.192	281.81	272.037	0	-9.38139	-19.1547	0.0359262	-72.7554	-71.7539	-72.5557	0	1.00147	0.199697	0.801773	0	0	0	0	0	0	0	Responsive			Responsive
AK205	Adapt. Npy	295.035	313.869	258.843	0	18.8337	-36.1917	0.212582	-68.1103	-67.9773	-72.7183	0	0.132969	-4.60805	4.74102	0	0.100386	0	0	0.100386	0	0.100386	Responsive			Responsive
AK206	Burst. Vip	463.88	508.09	362.86	0	44.2098	-101.02	0.400236	-73.3641	-70.8684	-74.2421	0	2.49573	-0.878021	3.37375	0	0.401667	0	0	0.401667	0	0.401667	Responsive			Responsive
AK207	RS	194.713	211.154	174.708	0	16.4403	-20.0052	0.208607	-78.076	-78.9904	-82.0291	0	-0.914436	-3.95314	3.0387	0	0.100412	0	0	0.100412	0	0.100412	Responsive			Responsive
AK208	RS	210.868	220.612	191.061	0	9.74368	-19.8069	0.154666	-73.88	-75.0194	-78.23	0	-1.1394	-4.34993	3.21052	0	0	0	0	0	0	0	Responsive			Responsive
AK209	Adapt. Sst	385.694	390.882	370.869	0	5.18762	-14.8248	0.0539608	-70.8537	-69.6991	-73.9887	0	1.15456	-3.13504	4.2896	0	0	0	0	0	0	0	Responsive			Responsive
AK210	Adapt. Npy	271.547	299.689	206.875	0	28.1423	-64.6718	0.448648	-72.4825	-70.709	-75.8805	0	1.77352	-3.39798	5.1715	0	0	0	0	0	0	0	Responsive			Responsive
AK211	Adapt. Npy	289.16	458.801	236.751	0	169.641	-52.4091	0.937905	-76.885	-69.3573	-79.9998	0	7.52764	-3.11484	10.6425	0	0	0	0	0	0	0	Responsive			Responsive
AK212	Adapt. Sst	521.311	516.974	432.45	0	-4.33673	-88.8615	0.195456	-70.3529	-69.4322	-73.0147	0	0.920656	-2.66187	3.58252	0	0	0	0	0	0	0	Responsive			Responsive
AK238	FS-Pvalb	32.199	36.9574	43.4106	0	4.75849	11.2117	-0.148654	-78.8695	-77.3979	-78.1822	0	1.47165	0.687331	0.784317	0	0	0	0	0	0	0	Not Responsive			Not Responsive
AK296	RS	808.995	1999.47	1543.78	0	1190.47	734.787	0.295175	-71.1251	-81.4098	-79.587	0	-10.2847	-8.46187	-1.82283	0	0	0	0	0	0	0	Not Responsive			Not Responsive
		Nb incresaed Rm	32	mean	0	77.5087	-39.1309				mean	0	2.61054	-3.9887				mean	0	0.334478	-0.0921526	17	32	N Responsive
		Nb total	39	s.e.m.	0	31.7996	23.4311				s.e.m.	0	0.78175	0.58077				s.e.m.	0	0.175636	0.0941011	39	39	N Total
			DR (MW)								DVm (mV)								DF (Hz)
		n=	mean	sd	sem	Shapiro-Wilk Test (Normality)				n=	mean	sd	sem	Shapiro-Wilk Test (Normality)				n=	mean	sd	sem	Shapiro-Wilk Test (Normality)
						W	p value							W	p value							W	p value
	Ctrl	39	0	0	0	N/A	0		Ctrl	39	0	0	0	N/A	0		Ctrl	39	0	0	0	N/A	0
	Tolbut	39	77.51	195.9	31.7996	0.4413	5.1572e-11		Tolbut	39	2.61282	4.82129	0.772024	0.932501	0.0216319		Tolbut	39	0.335897	1.08251	0.173341	0.644672	1.78267e-08
	Diazo	39	-39.15	144.5	23.4311	0.5968	3.80593e-09		Diazo	39	-3.98974	3.57328	0.572182	0.956457	0.13565		Diazo	39	-0.0923077	0.576918	0.0923808	0.164252	1.35e-13
						Friedman's ANOVA								Friedman's ANOVA								Friedman's ANOVA
						Chi² ANOVA (N = 39, DoF = 2) =	40.2051							Chi² ANOVA (N = 39, DoF = 2) =	38							Chi² ANOVA (N = 39, DoF = 2) =	28.5926
						p =	1.86023e-09							p =	5.6028e-09							p =	6.18297e-07
	*	**	***			Dunn's test								Dunn's test								Dunn's test
k \ a=	0.05	0.01	0.001	Comparison		Rank sum diff.	Individual p value					Comparison		Rank sum diff.	Individual p value					Comparison		Rank sum diff.	Individual p value
1	0.0166667	0.00333333	0.000333333	Diazo	Tolbut	56	2.28647e-10					Diazo	Tolbut	54	9.69842e-10					Diazo	Tolbut	25	0.00464473
2	0.025	0.005	0.0005	Ctrl	Diazo	28	0.00152242					Ctrl	Diazo	33	0.000186589					Ctrl	Tolbut	-23	0.0092079
3	0.05	0.01	0.001	Ctrl	Tolbut	-28	0.00152242					Ctrl	Tolbut	-21	0.0174171					Ctrl	Diazo	2	0.820847
