# Supplementary material for: Lactate is an energy substrate for rodent cortical neurons and enhances their firing activity
Source: eLife. 2021 Nov 12;10:e71424. doi: 10.7554/eLife.71424 (PMC8651295; doi:10.7554/eLife.71424)
Supplement: Figure 4—source data 2. [file elife-71424-fig4-data2.xls]

## Sheet: Feuil1
cell Id	Cell type	Cell group	D R KATP (%)	D Vm KATP (mV)	D F KATP (Hz)	K-ATP Pharmacology	Resposivness				Glu			GABA
AB005	RS	Glu	3.24665	17.6927	1.82363	Responsive	1				n=	Shapiro-Wilk Test (Normality)		n=	Shapiro-Wilk Test (Normality)		exact Fisher	Mann-Whitney U Test
AB007	RS	Glu	2.28845	10.5571	3.87335	Responsive	1					W	p value		W	p value	p value	U	p value
AK179	RS	Glu	1.05472	12.6142	0.302801	Responsive	1			KATP Responsivness	9	N/A	N/A	30	N/A	N/A	1
AK192	RS	Glu	0.118029	15.2445	0	Responsive	1			D G-KATP	8	0.75074	0.00832	24	0.64742	0		73	0.334477
AK196	RS	Glu	0.0552566	3.9844	0	Responsive	1			D Vm-KATP (mV)	8	0.89827	0.27876	24	0.96199	0.47961		96	1
AK203	RS	Glu	0.0359262	0.801773	0	Responsive	1			D F KATP (Hz)	8	0.64412	0.00052	24	0.5905	0		87	0.716882
AK207	RS	Glu	0.208607	3.0387	0.100412	Responsive	1
AK208	RS	Glu	0.154666	3.21052	0	Responsive	1
AK296	RS	Glu	0.295175	-1.82283	0	Not Responsive	0				RS			Burst. Vip			Adapt. Vip			Adapt. Sst			Adapt. Npy			FS-Pvalb
		Mean	0.895289	8.39299	0.762524	n(Responsive)=	#NAME?	0.888889			n=	Shapiro-Wilk Test (Normality)		n=	Shapiro-Wilk Test (Normality)		n=	Shapiro-Wilk Test (Normality)		n=	Shapiro-Wilk Test (Normality)		n=	Shapiro-Wilk Test (Normality)		n=	Shapiro-Wilk Test (Normality)		Chi square			Kruskal-Wallis' test
n=	9	s.e.m	0.464309	2.42655	0.530281	n(Not Responsive)=	#NAME?					W	p value		W	p value		W	p value		W	p value		W	p value		W	p value	X2	DoF	p value	H	n=	dof	p value
										KATP Responsivness	9	N/A	N/A	3	N/A	N/A	9	N/A	N/A	9	N/A	N/A	6	N/A	N/A	3	N/A	N/A	7.3125	5	0.198417	N/A	N/A	N/A	N/A
AK185	Burst. Vip	GABA	0.0703268	-0.284241	0	Not Responsive	0			D R-KATP	8	0.75074	0.00832	2	N/A	N/A	7	0.73868	0.00965	8	0.69713	0.00209	6	0.82491	0.09728	1	N/A	N/A				2.75656	32	5	0.737
AK200	Burst. Vip	GABA	0.585746	15.1838	3.31342	Responsive	1			D Vm-KATP (mV)	8	0.89827	0.27876	2	N/A	N/A	7	0.95161	0.74433	8	0.93025	0.51839	6	0.88788	0.30723	1	N/A	N/A				0.15855	32	5	0.999
AK206	Burst. Vip	GABA	0.400236	3.37375	0.401667	Responsive	1			D F KATP (Hz)	8	0.64412	0.00052	2	N/A	N/A	7	0.68013	0.00224	8	0.63066	0.00036	6	0.5264	5e-05							5.02021	32	5	0.413
		Mean	0.492991	9.27875	1.85754	n(Responsive)=	#NAME?	0.666667
n=	3	s.e.m	0.131176	8.35094	2.05892	n(Not Responsive)=	#NAME?
AB006	Adapt. Vip	GABA	2.6457	10.5525	0.775081	Responsive	1
AK078	Adapt. Vip	GABA	1.15921	1.60202	0.116308	Responsive	1
AK177	Adapt. Vip	GABA	0.216015	9.48811	0.029706	Responsive	1
AK180	Adapt. Vip	GABA	0.0650706	-1.06346	0	Not Responsive	0
AK183	Adapt. Vip	GABA	0.67848	12.2345	0	Responsive	1
AK181	Adapt. Vip	GABA	0.379614	5.43519	0	Responsive	1
AK197	Adapt. Vip	GABA	-0.0917798	-2.92728	0.385202	Not Responsive	0
AK198	Adapt. Vip	GABA	0.346321	6.61357	0	Responsive	1
AK199	Adapt. Vip	GABA	0.434262	9.1851	1.70657	Responsive	1
		Mean	0.837086	7.873	0.375381	n(Responsive)=	#NAME?	0.777778
n=	9	s.e.m	0.349529	1.46617	0.265684	n(Not Responsive)=	#NAME?
AB022	Adapt. Sst	GABA	2.6933	12.4321	-0.0484351	Responsive	1
AK184	Adapt. Sst	GABA	0.468203	0.169374	0	Responsive	1
AK186	Adapt. Sst	GABA	0.145996	4.09838	0	Responsive	1
AK189	Adapt. Sst	GABA	-0.0480011	7.77932	0.20199	Not Responsive	0
AK191	Adapt. Sst	GABA	0.427917	10.5948	1.0101	Responsive	1
AK194	Adapt. Sst	GABA	0.505822	9.31608	0.302954	Responsive	1
AK201	Adapt. Sst	GABA	2.85645	13.921	0.0836646	Responsive	1
AK209	Adapt. Sst	GABA	0.0539608	4.2896	0	Responsive	1
AK212	Adapt. Sst	GABA	0.195456	3.58252	0	Responsive	1
		Mean	0.918388	7.30048	0.168536	n(Responsive)=	#NAME?	0.888889
n=	9	s.e.m	0.437672	1.85755	0.135089	n(Not Responsive)=	#NAME?
AB020	Adapt. Npy	GABA	0.464058	9.25227	0	Responsive	1
AK178	Adapt. Npy	GABA	0.345469	12.5544	2.06292	Responsive	1
AK182	Adapt. Npy	GABA	0.367587	4.0501	0	Responsive	1
AK205	Adapt. Npy	GABA	0.212582	4.74102	0.100386	Responsive	1
AK210	Adapt. Npy	GABA	0.448648	5.1715	0	Responsive	1
AK211	Adapt. Npy	GABA	0.937905	10.6425	0	Responsive	1
		Mean	0.462708	7.7353	0.360551	n(Responsive)=	#NAME?	1
n=	6	s.e.m	0.111601	1.58866	0.373402	n(Not Responsive)=	#NAME?
AB008	FS-Pvalb	GABA	0.1703	6.52552	0.096876	Responsive	1
AK193	FS-Pvalb	GABA	-0.0257023	2.751	0	Not Responsive	0
AK238	FS-Pvalb	GABA	-0.148654	0.784317	0	Not Responsive	0
		Mean	0.1703	6.52552	0.096876	n(Responsive)=	#NAME?	0.333333
n=	3	s.e.m	#DIV/0!	#DIV/0!	#DIV/0!	n(Not Responsive)=	#NAME?
		Mean	0.714135	7.70874	0.414634	n(Responsive)=	#NAME?	0.8
n=	#NAME?	s.e.m	0.170207	0.855486	0.173576	n(Not Responsive)=	#NAME?
	GABA
