# Supplementary material for: Lactate is an energy substrate for rodent cortical neurons and enhances their firing activity
Source: eLife. 2021 Nov 12;10:e71424. doi: 10.7554/eLife.71424 (PMC8651295; doi:10.7554/eLife.71424)
Supplement: Figure 5—source data 1. [file elife-71424-fig5-data1.xls]

## Sheet: Feuil1
cell Id	10 Glc (Hz)	2.5 Glc (Hz)	2.5 Glc + 15 L (Hz)
AK319	2.23667	2.26333	4.30333
AK320	8.02333	6.6	17.3267
AK323	3.51	9.41	14.1433
AK324	7.63667	8.19667	11.9433
AK325	4.72	5.05667	4.85
AK333	6.31	6.94667	8.28667
AK359	3.39	2.64667	4.36333
AK360	3.72667	4.11	8.07
AK364	2.00333	2.82333	13.4333
AK368	2.89667	0.286667	3.3
AK370	4.18667	4.71333	7.86333
AK374	7.21667	9.03667	9.65667
AK375	2.26667	3.13333	3.85333
AK376	2.39333	2.21667	6.01333
AK378	3.31667	2.95	4.98333
AK383	1.45333	1.88667	11.4233
Mean	4.08042	4.51729	8.36333
s.e.m.	0.546032	0.713576	1.09828
Shapiro-Wilk	0.88549	0.92623	0.92084
p=	0.0473	0.21229	0.17402
				Friedman's ANOVA	Freq
				Chi² ANOVA (N = 16, df = 2) =	22.625
				p<	1e-05
	*	**	***	Firing Frequency		Dunn's test
k \ a=	0.05	0.01	0.001	Comparison		Rank sum diff.	Individual p value
1	0.0166667	0.00333333	0.000333333	10G	15L	-26	4.3028e-06
2	0.025	0.005	0.0005	15L	2.5G	-19	0.000782938
3	0.05	0.01	0.001	10G	2.5G	-7	0.215925
