# Supplementary material for: Lactate is an energy substrate for rodent cortical neurons and enhances their firing activity
Source: eLife. 2021 Nov 12;10:e71424. doi: 10.7554/eLife.71424 (PMC8651295; doi:10.7554/eLife.71424)
Supplement: Figure 5—source data 2. [file elife-71424-fig5-data2.xls]

## Sheet: Feuil1
cell Id	2.5G Normalized frequency	0.1L Normalized frequency	0.5L Normalized frequency	1L Normalized frequency	2L Normalized frequency	5L Normalized frequency	10L Normalized frequency	15L Normalized frequency
AK470	1	0.82716	1.14815
AK473	1	1.07108	1.20711	1.5098	2.85784	2.29167
AK474	1	1.75332	1.65252	1.63926	3.55621	3.28912
AK476	1	0.978218	0.853465	0.980198	1.02574	1.04752	1.21188	1.59406
AK477	1	0.730819	0.940182	1.07282	1.07022	1.15345	2.03641
AK478	1			1	0.908069	1.03473	1.30541
AK479	1			1.00766	1.1311	0.957895	1.40766
AK480	1				1.14035	1.37343	1.51003
AK319	1							1.90133
AK320	1							2.62525
AK323	1							1.50301
AK324	1							1.4571
AK325	1							0.95913
AK333	1							1.1929
AK359	1							1.64861
AK360	1							1.9635
AK364	1							4.75797
AK368	1							11.5116
AK370	1							1.66832
AK374	1							1.06861
AK375	1							1.22979
AK376	1							2.71278
AK378	1							1.68927
AK383	1							6.05477
Mean	1	1.07212	1.16028	1.20162	1.66993	1.59255	1.49428	2.67871
s.e.m.	0	0.201454	0.155567	0.131209	0.43764	0.358196	0.161454	0.660935
N=	24	5	5	6	7	7	5	17
	0	0.1	0.5	1	2		10
Shapiro-Wilk	N/A	0.83982	0.91584	0.76183	0.71165	0.76477	0.85568	0.62006
p=	0	0.16443	0.50346	0.02595	0.00496	0.01805	0.21316	2e-05
				Kruskal-Wallis' test
				H	n=	DoF	p value
				35.1423	76	7	1.05165e-05
	*	**	***	Normalized frequency		Uncorrected Dunn's test
k \ a=	0.05	0.01	0.001	Comparison		Mean rank diff.	p=
1	0.00714286	0.00142857	0.000142857	2.5 G	15L	-36.2353	1.359e-07
2	0.00833333	0.00166667	0.000166667	2.5 G	10L	-33.3	0.00178738
3	0.01	0.002	0.0002	2.5 G	5L	-23.5714	0.0113988
4	0.0125	0.0025	0.00025	2.5 G	2L	-22.4286	0.0160599
5	0.0166667	0.00333333	0.000333333	2.5 G	1L	-15.25	0.123414
6	0.025	0.005	0.0005	2.5 G	0.5L	-10.4	0.329315
7	0.05	0.01	0.001	2.5 G	0.1L	-1.2	0.910382
