# Supplementary material for: Lactate is an energy substrate for rodent cortical neurons and enhances their firing activity
Source: eLife. 2021 Nov 12;10:e71424. doi: 10.7554/eLife.71424 (PMC8651295; doi:10.7554/eLife.71424)
Supplement: Figure 5—source data 3. [file elife-71424-fig5-data3.xls]

## Sheet: Feuil1
cell Id	10G Normalized Frequency	15 LNormalized Frequency	15L +D Normalized Frequency	15L+T Normalized Frequency
AK362	1	1.86802	0.00380711	1.68782
AK364	1	6.63394	1.45757	2.5574
AK368	1	1.13924	0.119678
AK370	1	1.87818	0.963376	1.7914
AK374	1	1.33811	0.931178	1.49607
AK375	1	1.7	0.0676471	1.92353
AK376	1	2.51253	0.935933	0.619777
AK337	1	1.37748	0.684327	1.29249
AK345	1	1.29296	0.25	1.30634
AK348	1	1.81768	1.65285	1.91436
AK350	1	1.4476	0.717377	1.43678
Mean	1	2.09143	0.707613	1.6026
s.e.m.	0	0.491643	0.175615	0.170093
Shapiro-Wilk	N/A	0.56626	0.92659	0.96113
p=	0	1e-05	0.37739	0.79873
				Friedman's ANOVA	Normalized Frequency
				Chi² ANOVA (N = 10, df = 2) =	12.6
				p<	0.00184
	*	**	***	Normalized Frequency
k \ a=	0.05	0.01	0.001	Comparison		N=	T=	p=
1	0.0166667	0.00333333	0.000333333	15L	15L + D	11	0	0.003346
2	0.025	0.005	0.0005	15L + T	15L + D	10	2	0.009345
3	0.05	0.01	0.001	15L	15L + T	10	21	0.507625
