# Supplementary material for: Lactate is an energy substrate for rodent cortical neurons and enhances their firing activity
Source: eLife. 2021 Nov 12;10:e71424. doi: 10.7554/eLife.71424 (PMC8651295; doi:10.7554/eLife.71424)
Supplement: Figure 5—source data 4. [file elife-71424-fig5-data4.xls]

## Sheet: Feuil1
cell Id	Genotype	2.5 G Normalized Freq	L Normalized Freq
AK419	WT	1	1.01878
AK420	WT	1	0.988817
AK421	WT	1	1.79874
AK422	WT	1	3.17748
AK424	WT	1	1.24491
AK430	WT	1	1.23116
AK432	WT	1	1.62366
AK433	WT	1	0.849008
AK434	WT	1	1.31474
AK453	Kcnj11 KO	1	1.11597
AK454	Kcnj11 KO	1	0.450064
AK458	Kcnj11 KO	1	1.09057
AK459	Kcnj11 KO	1	3.6875
AK462	Kcnj11 KO	1	0.325
AK463	Kcnj11 KO	1	1.02436
AK464	Kcnj11 KO	1	1.10261
AK466	Kcnj11 KO	1	0.363057
AK467	Kcnj11 KO	1	0.932369
AK Frankfurt	Kcnj11 KO	1	1.15152
WT	Mean	1	1.47192
	s.e.m.	0	0.249991
Kcnj11 KO	Mean	1	1.1243
	s.e.m.	0	0.319958
WT	Shapiro-Wilk	N/A	0.77546
n=9	p=	0	0.01068
Kcnj11 KO	Shapiro-Wilk	N/A	0.67624
n=10	p=	0	0.00075
		*	**	***	L Normalized Freq
	k \ a=	0.05	0.01	0.001	Comparison		N=	T=	P=
		WT			2.5 G	15L	9	4	0.0284026
		Kcnj11 KO			2.5 G	15L	10	26	0.878482
