# Supplementary material for: Lactate is an energy substrate for rodent cortical neurons and enhances their firing activity
Source: eLife. 2021 Nov 12;10:e71424. doi: 10.7554/eLife.71424 (PMC8651295; doi:10.7554/eLife.71424)
Supplement: Figure 6—figure supplement 2—source data 1. [file elife-71424-fig6-figsupp2-data1.xls]

## Sheet: Feuil1
Cells	Cell Id	Mean CTRL -5-0 min (%)	Mean KCN 5-10min (%)
Pyramid 1	NADH-6300-s_0002-Pyramid 1	-2.70337e-16	0.0770114
Interneuron 1	NADH-6300-s_0002-Interneuron 1	5.28251e-17	0.0909561
Pyramid 2	NADH-6300-s_0002-Pyramid 2	-3.49183e-17	0.0688811
Interneuron 2	NADH-6300-s_0002-Interneuron 2	-5.59588e-17	0.0833389
Pyramid 3	NADH-6300-s_0002-Pyramid 3	6.49122e-17	0.0829355
Interneuron 3	NADH-6300-s_0002-Interneuron 3	1.96975e-17	0.103382
Pyramid 4	NADH-6300-s_0002-Pyramid 4	-5.41681e-17	0.0822513
Interneuron 4	NADH-6300-s_0002-Interneuron 4	9.62492e-18	0.0654743
Pyramid 1	NADH-6300-s02-0000-Pyramid 1	3.97867e-17	0.215152
Pyramid 2	NADH-6300-s02-0000-Pyramid 2	3.32955e-17	0.223952
Pyramid 3	NADH-6300-s02-0000-Pyramid 3	1.73193e-17	0.221918
Interneuron 1	NADH-6300-s02-0000-Interneuron 1	7.36418e-17	0.222869
Interneuron 2	NADH-6300-s02-0000-Interneuron 2	7.64398e-17	0.240084
Pyramid 4	NADH-6300-s02-0000-Pyramid 4	-7.80626e-17	0.226057
Pyramid 5	NADH-6300-s02-0000-Pyramid 5	2.87628e-17	0.216367
Pyramid 6	NADH-6300-s02-0000-Pyramid 6	-4.43753e-17	0.214756
Pyramid 7	NADH-6300-s02-0000-Pyramid 7	-2.28032e-17	0.217628
Pyramid 1	NADH-6000-s04_0000-Pyramid 1	6.37931e-18	0.243384
Pyramid 2	NADH-6000-s04_0000-Pyramid 2	-6.37931e-18	0.242978
Interneuron 1	NADH-6000-s04_0000-Interneuron 1	7.72232e-17	0.246715
Pyramid 3	NADH-6000-s04_0000-Pyramid 3	2.77556e-17	0.241241
Pyramid 4	NADH-6000-s04_0000-Pyramid 4	-8.21476e-17	0.245075
Pyramid 5	NADH-6000-s04_0000-Pyramid 5	3.57017e-17	0.251595
Interneuron 2	NADH-6000-s04_0000-Interneuron 2	-7.45931e-17	0.250299
Interneuron 3	NADH-6000-s04_0000-Interneuron 3	7.64398e-17	0.265319
Pyramid 1	NADH-6600-s05_0000- Pyramid 1	9.28916e-18	0.214861
Pyramid 2	NADH-6600-s05_0000- Pyramid 2	5.00272e-17	0.214551
Pyramid 3	NADH-6600-s05_0000- Pyramid 3	2.70841e-17	0.219689
Pyramid 4	NADH-6600-s05_0000- Pyramid 4	6.80459e-17	0.212329
Pyramid 5	NADH-6600-s05_0000- Pyramid 5	6.15547e-17	0.214078
Pyramid 6	NADH-6600-s05_0000- Pyramid 6	-4.29764e-17	0.217309
Interneuron 1	NADH-6600-s05_0000- Interneuron 1	3.18965e-17	0.224065
Interneuron 2	NADH-6600-s05_0000- Interneuron 2	-1.07441e-17	0.215314
Pyramid 1	NADH-7200-s06_0000-Pyramid 1	-4.71173e-17	0.139167
Pyramid 2	NADH-7200-s06_0000-Pyramid 2	7.11237e-17	0.136377
Pyramid 3	NADH-7200-s06_0000-Pyramid 3	-5.60707e-17	0.15044
Pyramid 4	NADH-7200-s06_0000-Pyramid 4	4.93557e-17	0.133658
Interneuron 1	NADH-7200-s06_0000-Interneuron 1	-8.13641e-17	0.138336
Pyramid 5	NADH-7200-s06_0000-Pyramid 5	-4.10178e-17	0.139737
Pyramid 6	NADH-7200-s06_0000-Pyramid 6	1.06322e-17	0.133717
Interneuron 2	NADH-7200-s06_0000-Interneuron 2	-7.7503e-17	0.141673
Interneuron 3	NADH-7200-s06_0000-Interneuron 3	-5.37764e-17	0.145949
N (cells)	Mean	-2.74998e-18	0.181687
42	s.e.m.	1.0415e-17	0.00968779
	Shapiro-Wilk	N/A	0.86316
	p=	0	0.00014
Cells	Cell Id	Mean CTRL -5-0 min (%)	Mean 10 Glc 5-10min (%)
Cell 1	ALS044-Cell 1	-2.70337e-16	-0.0564536
Cell 2	ALS044-Cell 2	5.28251e-17	-0.0511197
Cell 3	ALS044-Cell 3	-3.49183e-17	-0.0538869
Cell 4	ALS044-Cell 4	-5.59588e-17	-0.051856
Cell 5	ALS044-Cell 5	6.49122e-17	-0.0537102
Pyramid 1	ALS045-Pyramid 1	1.96975e-17	-0.0328015
Interneuron 1	ALS045-Interneuron 1	-5.41681e-17	-0.0330373
Pyramid 2	ALS045-Pyramid 2	9.62492e-18	-0.0304025
Interneuron 2	ALS045-Interneuron 2	3.97867e-17	-0.0292434
Pyramid 1	ALS046-Pyramid 1	3.32955e-17	-0.0644906
Interneuron 1	ALS046-Interneuron 1	1.73193e-17	-0.0667987
Pyramid 2	ALS046-Pyramid 2	7.36418e-17	-0.0629147
N (cells)	Mean	-8.68994e-18	-0.0488929
12	s.e.m.	2.80731e-17	0.00418369
	Shapiro-Wilk	N/A	0.87266
	p=	0	0.07063
AUC Ctrl				AUC Last 5 min
Comparison		U=	P=	Comparison		U=	P=
KCN	CTRL	246.5	0.910105	KCN	CTRL	0	5.83079e-12
