# Supplementary material for: Lactate is an energy substrate for rodent cortical neurons and enhances their firing activity
Source: eLife. 2021 Nov 12;10:e71424. doi: 10.7554/eLife.71424 (PMC8651295; doi:10.7554/eLife.71424)
Supplement: Figure 6—source data 1. [file elife-71424-fig6-data1.xls]

## Sheet: Feuil1
		Glutamatergic							Slc16a1		Slc16a7		Slc16a3		Ldha		Ldhb							Slc16a1			Slc16a7			Slc16a3			Ldha			Ldhb
		Slc16a1	Slc16a7	Slc16a3	Ldha	Ldhb			Glutamatergic	GABAergic	Glutamatergic	GABAergic	Glutamatergic	GABAergic	Glutamatergic	GABAergic	Glutamatergic	GABAergic		k \ a=	0.05	0.01	0.001	Comparison		p=	Comparison		p=	Comparison		p=	Comparison		p=	Comparison		p=
		0.191781	0.30137	0	0.92	0.88		n (positive)=	14	40	22	56	0	9	23	44	22	59		1	0.00238095	0.00047619	4.7619e-05	IB	FS-Pvalb	0.1722	Adapting-Vip	Adapting-Npy	0.0886	RS	Adapting-Vip	0.0763	RS	Adapting-Vip	0.0114	Adapting-Sst	Adapting-Npy	0.5333
	N=	73	73	48	25	25		n (negative)=	59	164	51	148	48	129	2	22	3	7		2	0.0025	0.0005	5e-05	IB	Adapting-Vip	0.1894	RS	Adapting-Vip	0.1488	RS	FS-Pvalb	0.1982	RS	Bursting-Vip	0.0784	Adapting-Npy	FS-Pvalb	0.5333
	n (positive)=	14	22	0	23	22		p exact Fisher, bilatéral	1		0.6525		0.1145		0.0161		1			3	0.00263158	0.000526316	5.26316e-05	RS	IB	0.1922	Adapting-Vip	FS-Pvalb	0.1528	RS	Adapting-Npy	0.2424	Bursting-Vip	Adapting-Vip	0.1231	Adapting-Vip	Adapting-Sst	0.5697
	n (negative)=	59	51	48	2	3														4	0.00277778	0.000555556	5.55556e-05	RS	Adapting-Npy	0.27	Adapting-Vip	Adapting-Sst	0.1615	Adapting-Vip	Adapting-Sst	0.2855	RS	Adapting-Npy	0.1626	Adapting-Vip	FS-Pvalb	0.5697
																				5	0.00294118	0.000588235	5.88235e-05	IB	Bursting-Vip	0.2954	Bursting-Vip	Adapting-Npy	0.3176	RS	Bursting-Vip	0.3333	RS	FS-Pvalb	0.2005	RS	Bursting-Vip	1
		GABAergic																		6	0.003125	0.000625	6.25e-05	IB	Adapting-Sst	0.2958	IB	Adapting-Vip	0.4124	Adapting-Sst	FS-Pvalb	0.5328	Adapting-Vip	Adapting-Sst	0.3828	RS	Adapting-Vip	1
		Slc16a1	Slc16a7	Slc16a3	Ldha	Ldhb														7	0.00333333	0.000666667	6.66667e-05	IB	Adapting-Npy	0.3343	Bursting-Vip	Adapting-Sst	0.5311	Adapting-Sst	Adapting-Npy	0.5498	Adapting-Vip	Adapting-Npy	0.521	RS	Adapting-Sst	1
		0.196078	0.27451	0.0652174	0.666667	0.893939														8	0.00357143	0.000714286	7.14286e-05	Adapting-Npy	FS-Pvalb	0.4269	Bursting-Vip	FS-Pvalb	0.5748	IB	Adapting-Vip	0.5558	RS	Adapting-Sst	0.5363	RS	Adapting-Npy	1
	N=	204	204	138	66	66														9	0.00384615	0.000769231	7.69231e-05	Adapting-Vip	Adapting-Npy	0.4816	RS	Bursting-Vip	0.6084	Adapting-Vip	FS-Pvalb	0.6658	Bursting-Vip	Adapting-Sst	0.5692	RS	FS-Pvalb	1
	n (positive)=	40	56	9	44	59														10	0.00416667	0.000833333	8.33333e-05	RS	FS-Pvalb	0.5254	IB	Bursting-Vip	0.6788	Adapting-Vip	Adapting-Npy	0.6827	Adapting-Sst	Adapting-Npy	0.6244	Bursting-Vip	Adapting-Vip	1
	n (negative)=	164	148	129	22	7														11	0.00454545	0.000909091	9.09091e-05	Adapting-Sst	FS-Pvalb	0.7498	RS	Adapting-Npy	0.697	IB	Bursting-Vip	1	Adapting-Vip	FS-Pvalb	0.6869	Bursting-Vip	Adapting-Sst	1
																				12	0.005	0.001	0.0001	Bursting-Vip	FS-Pvalb	0.7627	Bursting-Vip	Adapting-Vip	0.7729	IB	Adapting-Npy	1	Bursting-Vip	Adapting-Npy	1	Bursting-Vip	Adapting-Npy	1
		TOTAL																		13	0.00555556	0.00111111	0.000111111	Bursting-Vip	Adapting-Npy	0.7637	RS	Adapting-Sst	0.7993	IB	FS-Pvalb	1	Bursting-Vip	FS-Pvalb	1	Bursting-Vip	FS-Pvalb	1
		Slc16a1	Slc16a7	Slc16a3	Ldha	Ldhb														14	0.00625	0.00125	0.000125	Adapting-Vip	Adapting-Sst	0.7665	RS	IB	1	Bursting-Vip	Adapting-Vip	1	Adapting-Sst	FS-Pvalb	1	Adapting-Vip	Adapting-Npy	1
	n (positive)=	54	78	9	67	81			Slc16a1		Slc16a7		Slc16a3		Ldha		Ldhb			15	0.00714286	0.00142857	0.000142857	RS	Adapting-Sst	0.7687	RS	FS-Pvalb	1	Bursting-Vip	Adapting-Sst	1	Adapting-Npy	FS-Pvalb	1	RS	IB	N/A
	N=	277	277	186	91	91			RS	IB	RS	IB	RS	IB	RS	IB	RS	IB		16	0.00833333	0.00166667	0.000166667	Bursting-Vip	Adapting-Vip	0.7828	IB	Adapting-Sst	1	Bursting-Vip	Adapting-Npy	1	RS	IB	N/A	IB	Bursting-Vip	N/A
	%	0.194946	0.281588	0.0483871	0.736264	0.89011		n (positive)=	14	0	19	3	0	0	23	0	22	0		17	0.01	0.002	0.0002	RS	Bursting-Vip	0.7842	IB	Adapting-Npy	1	Bursting-Vip	FS-Pvalb	1	IB	Bursting-Vip	N/A	IB	Adapting-Vip	N/A
								n (negative)=	49	10	44	7	38	10	2	0	3	0		18	0.0125	0.0025	0.00025	RS	Adapting-Vip	1	IB	FS-Pvalb	1	Adapting-Npy	FS-Pvalb	1	IB	Adapting-Vip	N/A	IB	Adapting-Sst	N/A
		RS						p exact Fisher, bilatéral	0.1922		1		N/A		N/A		N/A			19	0.0166667	0.00333333	0.000333333	Bursting-Vip	Adapting-Sst	1	Adapting-Sst	Adapting-Npy	1	RS	IB	N/A	IB	Adapting-Sst	N/A	IB	Adapting-Npy	N/A
		Slc16a1	Slc16a7	Slc16a3	Ldha	Ldhb														20	0.025	0.005	0.0005	Adapting-Vip	FS-Pvalb	1	Adapting-Sst	FS-Pvalb	1	RS	Adapting-Sst	N/A	IB	Adapting-Npy	N/A	IB	FS-Pvalb	N/A
		0.222222	0.301587	0	0.92	0.88			Slc16a1		Slc16a7		Slc16a3		Ldha		Ldhb			21	0.05	0.01	0.001	Adapting-Sst	Adapting-Npy	1	Adapting-Npy	FS-Pvalb	1	IB	Adapting-Sst	N/A	IB	FS-Pvalb	N/A	Adapting-Sst	FS-Pvalb	N/A
	N=	63	63	38	25	25			RS	Burst. Vip	RS	Burst. Vip	RS	Burst. Vip	RS	Burst. Vip	RS	Burst. Vip
	n (positive)=	14	19	0	23	22		n (positive)=	14	5	19	6	0	1	23	5	22	7
	n (negative)=	49	44	38	2	3		n (negative)=	49	22	44	21	38	18	2	3	3	1
								p exact Fisher, bilatéral	0.7842		0.6084		0.3333		0.0784		1
		IB
		Slc16a1	Slc16a7	Slc16a3	Ldha	Ldhb			Slc16a1		Slc16a7		Slc16a3		Ldha		Ldhb
		0	0.3	0	#DIV/0!	#DIV/0!			RS	Adapting-Vip	RS	Adapting-Vip	RS	Adapting-Vip	RS	Adapting-Vip	RS	Adapting-Vip
	N=	10	10	10	0	0		n (positive)=	14	13	19	11	0	3	23	18	22	26
	n (positive)=	0	3	0	0	0		n (negative)=	49	46	44	48	38	26	2	12	3	4
	n (negative)=	10	7	10	0	0		p exact Fisher, bilatéral	1		0.1488		0.0763		0.0114		1
		Bursting Vip							Slc16a1		Slc16a7		Slc16a3		Ldha		Ldhb
		Slc16a1	Slc16a7	Slc16a3	Ldha	Ldhb			RS	Adapting-Sst	RS	Adapting-Sst	RS	Adapting-Sst	RS	Adapting-Sst	RS	Adapting-Sst
		0.185185	0.222222	0.0526316	0.625	0.875		n (positive)=	14	4	19	8	0	0	23	6	22	7
	N=	27	27	19	8	8		n (negative)=	49	20	44	16	38	17	2	1	3	0
	n (positive)=	5	6	1	5	7		p exact Fisher, bilatéral	0.7687		0.7993		N/A		0.5363		1
	n (negative)=	22	21	18	3	1
									Slc16a1		Slc16a7		Slc16a3		Ldha		Ldhb
		Adapting-Vip							RS	Adapting-Npy	RS	Adapting-Npy	RS	Adapting-Npy	RS	Adapting-Npy	RS	Adapting-Npy
		Slc16a1	Slc16a7	Slc16a3	Ldha	Ldhb		n (positive)=	14	9	19	19	0	3	23	10	22	12
		0.220339	0.186441	0.103448	0.6	0.866667		n (negative)=	49	47	44	37	38	39	2	4	3	2
	N=	59	59	29	30	30		p exact Fisher, bilatéral	0.27		0.697		0.2424		0.1626		1
	n (positive)=	13	11	3	18	26
	n (negative)=	46	48	26	12	4			Slc16a1		Slc16a7		Slc16a3		Ldha		Ldhb
									RS	FS-Pvalb	RS	FS-Pvalb	RS	FS-Pvalb	RS	FS-Pvalb	RS	FS-Pvalb
		Adapting-Sst						n (positive)=	14	9	19	12	0	2	23	5	22	7
		Slc16a1	Slc16a7	Slc16a3	Ldha	Ldhb		n (negative)=	49	29	44	26	38	29	2	2	3	0
		0.166667	0.333333	0	0.857143	1		p exact Fisher, bilatéral	0.5254		1		0.1982		0.2005		1
	N=	24	24	17	7	7
	n (positive)=	4	8	0	6	7			Slc16a1		Slc16a7		Slc16a3		Ldha		Ldhb
	n (negative)=	20	16	17	1	0			IB	Burst. Vip	IB	Burst. Vip	IB	Burst. Vip	IB	Burst. Vip	IB	Burst. Vip
								n (positive)=	0	5	3	6	0	1	0	5	0	7
		Adapting-Npy						n (negative)=	10	22	7	21	10	18	0	3	0	1
		Slc16a1	Slc16a7	Slc16a3	Ldha	Ldhb		p exact Fisher, bilatéral	0.2954		0.6788		1		N/A		N/A
		0.160714	0.339286	0.0714286	0.714286	0.857143
	N=	56	56	42	14	14			Slc16a1		Slc16a7		Slc16a3		Ldha		Ldhb
	n (positive)=	9	19	3	10	12			IB	Adapting-Vip	IB	Adapting-Vip	IB	Adapting-Vip	IB	Adapting-Vip	IB	Adapting-Vip
	n (negative)=	47	37	39	4	2		n (positive)=	0	13	3	11	0	3	0	18	0	26
								n (negative)=	10	46	7	48	10	26	0	12	0	4
		FS-Pvalb						p exact Fisher, bilatéral	0.1894		0.4124		0.5558		N/A		N/A
		Slc16a1	Slc16a7	Slc16a3	Ldha	Ldhb
		0.236842	0.315789	0.0645161	0.714286	1			Slc16a1		Slc16a7		Slc16a3		Ldha		Ldhb
	N=	38	38	31	7	7			IB	Adapting-Sst	IB	Adapting-Sst	IB	Adapting-Sst	IB	Adapting-Sst	IB	Adapting-Sst
	n (positive)=	9	12	2	5	7		n (positive)=	0	4	3	8	0	0	0	6	0	7
	n (negative)=	29	26	29	2	0		n (negative)=	10	20	7	16	10	17	0	1	0	0
								p exact Fisher, bilatéral	0.2958		1		N/A		N/A		N/A
									Slc16a1		Slc16a7		Slc16a3		Ldha		Ldhb
									IB	Adapting-Npy	IB	Adapting-Npy	IB	Adapting-Npy	IB	Adapting-Npy	IB	Adapting-Npy
								n (positive)=	0	9	3	19	0	3	0	10	0	12
								n (negative)=	10	47	7	37	10	39	0	4	0	2
								p exact Fisher, bilatéral	0.3343		1		1		N/A		N/A
									Slc16a1		Slc16a7		Slc16a3		Ldha		Ldhb
									IB	FS-Pvalb	IB	FS-Pvalb	IB	FS-Pvalb	IB	FS-Pvalb	IB	FS-Pvalb
								n (positive)=	0	9	3	12	0	2	0	5	0	7
								n (negative)=	10	29	7	26	10	29	0	2	0	0
								p exact Fisher, bilatéral	0.1722		1		1		N/A		N/A
									Slc16a1		Slc16a7		Slc16a3		Ldha		Ldhb
									Burst. Vip	Adapting-Vip	Burst. Vip	Adapting-Vip	Burst. Vip	Adapting-Vip	Burst. Vip	Adapting-Vip	Burst. Vip	Adapting-Vip
								n (positive)=	5	13	6	11	1	3	5	18	7	26
								n (negative)=	22	46	21	48	18	26	3	12	1	4
								p exact Fisher, bilatéral	0.7828		0.7729		1		0.1231		1
									Slc16a1		Slc16a7		Slc16a3		Ldha		Ldhb
									Burst. Vip	Adapting-Sst	Burst. Vip	Adapting-Sst	Burst. Vip	Adapting-Sst	Burst. Vip	Adapting-Sst	Burst. Vip	Adapting-Sst
								n (positive)=	5	4	6	8	1	0	5	6	7	7
								n (negative)=	22	20	21	16	18	17	3	1	1	0
								p exact Fisher, bilatéral	1		0.5311		1		0.5692		1
									Slc16a1		Slc16a7		Slc16a3		Ldha		Ldhb
									Burst. Vip	Adapting-Npy	Burst. Vip	Adapting-Npy	Burst. Vip	Adapting-Npy	Burst. Vip	Adapting-Npy	Burst. Vip	Adapting-Npy
								n (positive)=	5	9	6	19	1	3	5	10	7	12
								n (negative)=	22	47	21	37	18	39	3	4	1	2
								p exact Fisher, bilatéral	0.7637		0.3176		1		1		1
									Slc16a1		Slc16a7		Slc16a3		Ldha		Ldhb
									Burst. Vip	FS-Pvalb	Burst. Vip	FS-Pvalb	Burst. Vip	FS-Pvalb	Burst. Vip	FS-Pvalb	Burst. Vip	FS-Pvalb
								n (positive)=	5	9	6	12	1	2	5	5	7	7
								n (negative)=	22	29	21	26	18	29	3	2	1	0
								p exact Fisher, bilatéral	0.7627		0.5748		1		1		1
									Slc16a1		Slc16a7		Slc16a3		Ldha		Ldhb
									Adapting-Vip	Adapting-Sst	Adapting-Vip	Adapting-Sst	Adapting-Vip	Adapting-Sst	Adapting-Vip	Adapting-Sst	Adapting-Vip	Adapting-Sst
								n (positive)=	13	4	11	8	3	0	18	6	26	7
								n (negative)=	46	20	48	16	26	17	12	1	4	0
								p exact Fisher, bilatéral	0.7665		0.1615		0.2855		0.3828		0.5697
									Slc16a1		Slc16a7		Slc16a3		Ldha		Ldhb
									Adapting-Vip	Adapting-Npy	Adapting-Vip	Adapting-Npy	Adapting-Vip	Adapting-Npy	Adapting-Vip	Adapting-Npy	Adapting-Vip	Adapting-Npy
								n (positive)=	13	9	11	19	3	3	18	10	26	12
								n (negative)=	46	47	48	37	26	39	12	4	4	2
								p exact Fisher, bilatéral	0.4816		0.0886		0.6827		0.521		1
									Slc16a1		Slc16a7		Slc16a3		Ldha		Ldhb
									Adapting-Vip	FS-Pvalb	Adapting-Vip	FS-Pvalb	Adapting-Vip	FS-Pvalb	Adapting-Vip	FS-Pvalb	Adapting-Vip	FS-Pvalb
								n (positive)=	13	9	11	12	3	2	18	5	26	7
								n (negative)=	46	29	48	26	26	29	12	2	4	0
								p exact Fisher, bilatéral	1		0.1528		0.6658		0.6869		0.5697
									Slc16a1		Slc16a7		Slc16a3		Ldha		Ldhb
									Adapting-Sst	Adapting-Npy	Adapting-Sst	Adapting-Npy	Adapting-Sst	Adapting-Npy	Adapting-Sst	Adapting-Npy	Adapting-Sst	Adapting-Npy
								n (positive)=	4	9	8	19	0	3	6	10	7	12
								n (negative)=	20	47	16	37	17	39	1	4	0	2
								p exact Fisher, bilatéral	1		1		0.5498		0.6244		0.5333
									Slc16a1		Slc16a7		Slc16a3		Ldha		Ldhb
									Adapting-Sst	FS-Pvalb	Adapting-Sst	FS-Pvalb	Adapting-Sst	FS-Pvalb	Adapting-Sst	FS-Pvalb	Adapting-Sst	FS-Pvalb
								n (positive)=	4	9	8	12	0	2	6	5	7	7
								n (negative)=	20	29	16	26	17	29	1	2	0	0
								p exact Fisher, bilatéral	0.7498		1		0.5328		1		N/A
									Slc16a1		Slc16a7		Slc16a3		Ldha		Ldhb
									Adapting-Npy	FS-Pvalb	Adapting-Npy	FS-Pvalb	Adapting-Npy	FS-Pvalb	Adapting-Npy	FS-Pvalb	Adapting-Npy	FS-Pvalb
								n (positive)=	9	9	19	12	3	2	10	5	12	7
								n (negative)=	47	29	37	26	39	29	4	2	2	0
								p exact Fisher, bilatéral	0.4269		1		1		1		0.5333
