# Supplementary material for: Lactate is an energy substrate for rodent cortical neurons and enhances their firing activity
Source: eLife. 2021 Nov 12;10:e71424. doi: 10.7554/eLife.71424 (PMC8651295; doi:10.7554/eLife.71424)
Supplement: Figure 6—source data 2. [file elife-71424-fig6-data2.xls]

## Sheet: Feuil1
cell Id	2.5G Normalized Freq	15L Normalized Freq	4-CIN Normalized Freq
AK319	1	1.90133	0.399116
AK320	1	2.62525	2.40606
AK324	1	1.4571	0.321269
AK325	1	0.95913	0.0500989
AK333	1	1.1929	0.96881
AK359	1	1.64861	0
AK360	1	1.9635	0.0251419
AK378	1	1.68927	0.106215
AK383	1	6.05477	0.171378
Mean	1	2.16576	0.494232
s.e.m.	0	0.542642	0.274876
Shapiro-Wilk	NA	0.68331	0.7385
p=	0	0.00091	0.00399
		Friedman's ANOVA	Normalized Frequency
		Chi² ANOVA (N = 9, df = 2) =	14.2222
		p<	0.00058
	*	**	***	Normalized Frequency
k \ a=	0.05	0.01	0.001	Comparison		N=	T=	P=
1	#REF!	#REF!	#REF!	15L	4-CIN	9	0	0.007686
