# Supplementary material for: Lactate is an energy substrate for rodent cortical neurons and enhances their firing activity
Source: eLife. 2021 Nov 12;10:e71424. doi: 10.7554/eLife.71424 (PMC8651295; doi:10.7554/eLife.71424)
Supplement: Source data 1. [file elife-71424-supp8.xls]

## Sheet: Feuil1
	*	**	***	Digitized layer				Area (µm2)				Major axis (µm)				Minor axis (µm)				Elongation				Perimeter (µm)				Roundness
k \ a=	0.05	0.01	0.001	Comparison		U=	p=	Comparison		U=	p=	Comparison		U=	p=	Comparison		U=	p=	Comparison		U=	p=	Comparison		U=	p=	Comparison		U=	p=
1	0.00238095	0.00047619	4.7619e-05	IB	Adapting-Npy	2	3.79182e-11	Bursting-Vip	FS-Pvalb	175	2.30553e-06	IB	Adapting-Sst	39	0.00147424	RS	Adapting-Vip	917	7.17354e-07	RS	Adapting-Sst	349	6.79953e-05	Bursting-Vip	FS-Pvalb	271	0.00104602	IB	Adapting-Sst	63	0.0310443
2	0.0025	0.0005	5e-05	IB	Adapting-Vip	33	2.09909e-07	Adapting-Vip	FS-Pvalb	551	1.52965e-05	IB	FS-Pvalb	73	0.00215291	RS	Adapting-Npy	1228.5	0.00410053	RS	Adapting-Vip	1147	0.000222592	Adapting-Vip	FS-Pvalb	703.5	0.00180331	Bursting-Vip	Adapting-Sst	215.5	0.0398619
3	0.00263158	0.000526316	5.26316e-05	Adapting-Npy	FS-Pvalb	432	4.05342e-07	RS	Bursting-Vip	459	0.000442405	Bursting-Vip	Adapting-Sst	170.5	0.00319582	RS	Adapting-Sst	459	0.00436809	RS	FS-Pvalb	712	0.000566777	IB	FS-Pvalb	75.5	0.00262015	Bursting-Vip	FS-Pvalb	379	0.0754274
4	0.00277778	0.000555556	5.55556e-05	RS	Adapting-Npy	879	1.31242e-06	Bursting-Vip	Adapting-Sst	145	0.0005301	Bursting-Vip	FS-Pvalb	305	0.00518254	RS	Bursting-Vip	545	0.00671532	Bursting-Vip	Adapting-Sst	137	0.000846794	Adapting-Vip	Adapting-Sst	426	0.00419596	RS	IB	212	0.100636
5	0.00294118	0.000588235	5.88235e-05	IB	Bursting-Vip	12	1.54451e-06	Adapting-Vip	Adapting-Sst	384	0.000923631	Adapting-Vip	Adapting-Sst	458	0.0115233	RS	FS-Pvalb	833	0.0103705	Bursting-Vip	FS-Pvalb	263	0.00253248	Bursting-Vip	Adapting-Sst	182	0.00680838	IB	FS-Pvalb	130	0.132478
6	0.003125	0.000625	6.25e-05	Adapting-Sst	Adapting-Npy	269	1.06297e-05	IB	FS-Pvalb	65	0.000933247	IB	Adapting-Vip	154	0.014976	Adapting-Vip	FS-Pvalb	781	0.011628	Bursting-Vip	Adapting-Vip	433	0.00255528	IB	Adapting-Sst	50	0.0070267	Bursting-Vip	Adapting-Vip	636	0.137202
7	0.00333333	0.000666667	6.66667e-05	Adapting-Vip	Adapting-Npy	938.5	4.78283e-05	IB	Adapting-Sst	42	0.00233126	Adapting-Vip	FS-Pvalb	836	0.0350646	RS	IB	166.5	0.0155499	IB	Adapting-Sst	47	0.00473422	RS	Bursting-Vip	561	0.0103431	RS	Bursting-Vip	690	0.159811
8	0.00357143	0.000714286	7.14286e-05	IB	Adapting-Sst	29	0.000258205	Bursting-Vip	Adapting-Npy	477	0.00625878	RS	IB	188	0.0411375	Adapting-Vip	Adapting-Npy	1232	0.0185096	IB	FS-Pvalb	85	0.00653776	RS	IB	190	0.0446028	IB	Adapting-Npy	203	0.173899
9	0.00384615	0.000769231	7.69231e-05	RS	IB	124	0.00147613	RS	Adapting-Vip	1366	0.0113615	Bursting-Vip	Adapting-Vip	580.5	0.0439568	Adapting-Vip	Adapting-Sst	574	0.181198	Adapting-Sst	Adapting-Npy	435	0.0159747	IB	Adapting-Npy	183	0.0844347	Adapting-Vip	Adapting-Sst	575.5	0.184517
10	0.00416667	0.000833333	8.33333e-05	IB	FS-Pvalb	91	0.0107678	RS	IB	177	0.025793	IB	Adapting-Npy	174.5	0.0584197	Bursting-Vip	Adapting-Vip	668.5	0.235228	IB	Adapting-Vip	156	0.0165771	RS	Adapting-Vip	1522	0.0851935	Adapting-Sst	Adapting-Npy	549	0.199853
11	0.00454545	0.000909091	9.09091e-05	Bursting-Vip	Adapting-Npy	497.5	0.0113554	Adapting-Npy	FS-Pvalb	799	0.0411619	Adapting-Sst	Adapting-Npy	492	0.0591463	Bursting-Vip	Adapting-Npy	665	0.38134	RS	Adapting-Npy	1331	0.0301558	Bursting-Vip	Adapting-Npy	584	0.0956741	IB	Adapting-Vip	221	0.213761
12	0.005	0.001	0.0001	Bursting-Vip	FS-Pvalb	326	0.0123216	Bursting-Vip	Adapting-Vip	584	0.0480926	RS	Adapting-Sst	566	0.0717592	Bursting-Vip	FS-Pvalb	447.5	0.385839	Adapting-Vip	Adapting-Sst	522	0.062135	Adapting-Sst	Adapting-Npy	516	0.102834	Bursting-Vip	Adapting-Npy	630	0.224038
13	0.00555556	0.00111111	0.000111111	Adapting-Vip	FS-Pvalb	794	0.0153246	IB	Adapting-Npy	178	0.0690499	Adapting-Npy	FS-Pvalb	876	0.149208	IB	Adapting-Vip	249	0.443764	Bursting-Vip	Adapting-Npy	531	0.105698	Bursting-Vip	Adapting-Vip	643	0.155408	Adapting-Sst	FS-Pvalb	384	0.303934
14	0.00625	0.00125	0.000125	Bursting-Vip	Adapting-Sst	207.5	0.0270208	Adapting-Sst	Adapting-Npy	503	0.0767879	RS	Bursting-Vip	686	0.149541	Adapting-Sst	FS-Pvalb	405	0.468398	Adapting-Npy	FS-Pvalb	859	0.14775	Adapting-Npy	FS-Pvalb	882.5	0.162754	RS	Adapting-Npy	1614.5	0.427469
15	0.00714286	0.00142857	0.000142857	Adapting-Vip	Adapting-Sst	519.5	0.0579577	Adapting-Vip	Adapting-Npy	1361.5	0.10422	RS	FS-Pvalb	1006.5	0.182607	IB	FS-Pvalb	161.5	0.475311	IB	Adapting-Npy	198	0.166697	IB	Adapting-Vip	215	0.17809	RS	Adapting-Vip	1725.5	0.496983
16	0.00833333	0.00166667	0.000166667	RS	Bursting-Vip	639	0.0629406	RS	FS-Pvalb	991	0.150321	Bursting-Vip	Adapting-Npy	621	0.192344	IB	Adapting-Npy	242	0.508162	Adapting-Sst	FS-Pvalb	364	0.187522	Adapting-Vip	Adapting-Npy	1458	0.280086	RS	Adapting-Sst	690	0.536405
17	0.01	0.002	0.0002	RS	Adapting-Vip	1539	0.102337	RS	Adapting-Sst	643	0.287449	IB	Bursting-Vip	108	0.370732	Adapting-Sst	Adapting-Npy	609.5	0.514282	Adapting-Vip	FS-Pvalb	947	0.200791	RS	FS-Pvalb	1046.5	0.292901	Adapting-Vip	FS-Pvalb	1047	0.588683
18	0.0125	0.0025	0.00025	Bursting-Vip	Adapting-Vip	701.5	0.378976	IB	Adapting-Vip	236	0.323825	Adapting-Sst	FS-Pvalb	396	0.392679	IB	Adapting-Sst	106.5	0.615481	Adapting-Vip	Adapting-Npy	1451	0.33353	RS	Adapting-Sst	656	0.347076	IB	Bursting-Vip	119.5	0.601655
19	0.0166667	0.00333333	0.000333333	RS	FS-Pvalb	1077	0.403955	RS	Adapting-Npy	1622	0.45265	RS	Adapting-Npy	1722	0.825781	Adapting-Npy	FS-Pvalb	1033	0.815125	IB	Bursting-Vip	110	0.602159	RS	Adapting-Npy	1640.5	0.512237	Adapting-Npy	FS-Pvalb	1008.5	0.670425
20	0.025	0.005	0.0005	Adapting-Sst	FS-Pvalb	413	0.541876	IB	Bursting-Vip	124	0.723833	Adapting-Vip	Adapting-Npy	1630.5	0.904615	IB	Bursting-Vip	130	0.879702	RS	IB	291	0.710295	Adapting-Sst	FS-Pvalb	420	0.610498	RS	FS-Pvalb	1136.5	0.672899
21	0.05	0.01	0.001	RS	Adapting-Sst	742.5	0.898687	Adapting-Sst	FS-Pvalb	455	0.99428	RS	Adapting-Vip	1843	0.938971	Bursting-Vip	Adapting-Sst	319	0.932927	RS	Bursting-Vip	768	0.861372	IB	Bursting-Vip	124	0.723833	Adapting-Vip	Adapting-Npy	1616	0.843147
