# Supplementary material for: Lactate is an energy substrate for rodent cortical neurons and enhances their firing activity
Source: eLife. 2021 Nov 12;10:e71424. doi: 10.7554/eLife.71424 (PMC8651295; doi:10.7554/eLife.71424)
Supplement: Source data 2. [file elife-71424-supp9.xls]

## Sheet: Feuil1
		RS														Slc17a7		Gad2		Gad1		NOS1		GADs		CB		PV		CR		NPY		VIP		SOM		CCK
		Slc17a7	Gad2	Gad1	Nos1	Gads	Calb1	Pvalb	Calb2	Npy	Vip	Sst	Cck			RS	IB	RS	IB	RS	IB	RS	IB	RS	IB	RS	IB	RS	IB	RS	IB	RS	IB	RS	IB	RS	IB	RS	IB				*	**	***	Slc17a7			Gad2
		0.936508	0.047619	0.0634921	0	0.0952381	0.396825	0.333333	0	0	0	0.0952381	0.333333		n (positive)=	59	10	3	1	4	1	0	0	6	1	25	4	21	2	0	0	0	1	0	0	6	0	21	1			k \ a=	0.05	0.01	0.001	Comparison		p=	Comparison
	N=	63	63	63	63	63	63	63	63	63	63	63	63		n (negative)=	4	0	60	9	59	9	63	10	57	9	38	6	42	8	63	10	63	9	63	10	57	10	42	9			1	0.00238095	0.00047619	4.7619e-05	RS	Bursting-Vip	0	RS
	n (positive)=	59	3	4	0	6	25	21	0	0	0	6	21		p exact Fisher, bilatéral	1		0.4527		0.532		N/A		1		1		0.4888		N/A		0.137		N/A		0.5871		0.2643				2	0.0025	0.0005	5e-05	RS	Adapting-Vip	0	RS
	n (negative)=	4	60	59	63	57	38	42	63	63	63	57	42																													3	0.00263158	0.000526316	5.26316e-05	RS	Adapting-Sst	0	RS
																Slc17a7		Gad2		Gad1		NOS1		GADs		CB		PV		CR		NPY		VIP		SOM		CCK				4	0.00277778	0.000555556	5.55556e-05	RS	Adapting-Npy	0	RS
		IB														RS	Bursting-Vip	RS	Bursting-Vip	RS	Bursting-Vip	RS	Bursting-Vip	RS	Bursting-Vip	RS	Bursting-Vip	RS	Bursting-Vip	RS	Bursting-Vip	RS	Bursting-Vip	RS	Bursting-Vip	RS	Bursting-Vip	RS	Bursting-Vip			5	0.00294118	0.000588235	5.88235e-05	RS	FS-Pvalb	0	RS
		Slc17a7	Gad2	Gad1	Nos1	Gads	Calb1	Pvalb	Calb2	Npy	Vip	Sst	Cck		n (positive)=	59	12	3	22	4	21	0	0	6	27	25	2	21	3	0	7	0	2	0	24	6	3	21	6			6	0.003125	0.000625	6.25e-05	IB	Adapting-Vip	0	IB
		1	0.1	0.1	0	0.1	0.4	0.2	0	0.1	0	0	0.1		n (negative)=	4	15	60	5	59	6	63	27	57	0	38	25	42	24	63	20	63	25	63	3	57	24	42	21			7	0.00333333	0.000666667	6.66667e-05	IB	Adapting-Npy	0.0001	IB
	N=	10	10	10	10	10	10	10	10	10	10	10	10		p exact Fisher, bilatéral	0		0		0		N/A		0		0.0022		0.0372		0.0001		0.0876		0		1		0.3277				8	0.00357143	0.000714286	7.14286e-05	IB	FS-Pvalb	0.0001	IB
	n (positive)=	10	1	1	0	1	4	2	0	1	0	0	1																													9	0.00384615	0.000769231	7.69231e-05	IB	Adapting-Sst	0.0004	IB
	n (negative)=	0	9	9	10	9	6	8	10	9	10	10	9																													10	0.00416667	0.000833333	8.33333e-05	IB	Bursting-Vip	0.0019	IB
																Slc17a7		Gad2		Gad1		NOS1		GADs		CB		PV		CR		NPY		VIP		SOM		CCK				11	0.00454545	0.000909091	9.09091e-05	Bursting-Vip	Adapting-Vip	0.0149	Adapting-Npy
		Bursting-Vip														RS	Adapting-Vip	RS	Adapting-Vip	RS	Adapting-Vip	RS	Adapting-Vip	RS	Adapting-Vip	RS	Adapting-Vip	RS	Adapting-Vip	RS	Adapting-Vip	RS	Adapting-Vip	RS	Adapting-Vip	RS	Adapting-Vip	RS	Adapting-Vip			12	0.005	0.001	0.0001	Adapting-Vip	Adapting-Npy	0.0525	Adapting-Vip
		Slc17a7	Gad2	Gad1	Nos1	Gads	Calb1	Pvalb	Calb2	Npy	Vip	Sst	Cck		n (positive)=	59	10	3	49	4	50	0	3	6	59	25	10	21	12	0	23	0	7	0	49	6	5	21	20			13	0.00555556	0.00111111	0.000111111	Adapting-Vip	FS-Pvalb	0.1354	Bursting-Vip
		0.444444	0.814815	0.777778	0	1	0.0740741	0.111111	0.259259	0.0740741	0.888889	0.111111	0.222222		n (negative)=	4	49	60	10	59	9	63	56	57	0	38	49	42	47	63	36	63	52	63	10	57	54	42	39			14	0.00625	0.00125	0.000125	Adapting-Vip	Adapting-Sst	0.1413	Adapting-Vip
	N=	27	27	27	27	27	27	27	27	27	27	27	27		p exact Fisher, bilatéral	0		0		0		0.1101		0		0.0087		0.1529		0		0.0051		0		1		1				15	0.00714286	0.00142857	0.000142857	Bursting-Vip	FS-Pvalb	0.3103	Adapting-Sst
	n (positive)=	12	22	21	0	27	2	3	7	2	24	3	6																													16	0.00833333	0.00166667	0.000166667	Bursting-Vip	Adapting-Npy	0.468	Adapting-Sst
	n (negative)=	15	5	6	27	0	25	24	20	25	3	24	21			Slc17a7		Gad2		Gad1		NOS1		GADs		CB		PV		CR		NPY		VIP		SOM		CCK				17	0.01	0.002	0.0002	Bursting-Vip	Adapting-Sst	0.5667	RS
																RS	Adapting-Sst	RS	Adapting-Sst	RS	Adapting-Sst	RS	Adapting-Sst	RS	Adapting-Sst	RS	Adapting-Sst	RS	Adapting-Sst	RS	Adapting-Sst	RS	Adapting-Sst	RS	Adapting-Sst	RS	Adapting-Sst	RS	Adapting-Sst			18	0.0125	0.0025	0.00025	RS	IB	1	Bursting-Vip
		Adapting-Vip													n (positive)=	59	8	3	21	4	21	0	3	6	24	25	21	21	9	0	1	0	16	0	1	6	22	21	1			19	0.0166667	0.00333333	0.000333333	Adapting-Sst	Adapting-Npy	1	Bursting-Vip
		Slc17a7	Gad2	Gad1	Nos1	Gads	Calb1	Pvalb	Calb2	Npy	Vip	Sst	Cck		n (negative)=	4	16	60	3	59	3	63	21	57	0	38	3	42	15	63	23	63	8	63	23	57	2	42	23			20	0.025	0.005	0.0005	Adapting-Sst	FS-Pvalb	1	Adapting-Vip
		0.169492	0.830508	0.847458	0.0508475	1	0.169492	0.20339	0.389831	0.118644	0.830508	0.0847458	0.338983		p exact Fisher, bilatéral	0		0		0		0.0191		0		0.0001		0.8022		0.2759		0		0.2759		0		0.005				21	0.05	0.01	0.001	Adapting-Npy	FS-Pvalb	1	Bursting-Vip
	N=	59	59	59	59	59	59	59	59	59	59	59	59
	n (positive)=	10	49	50	3	59	10	12	23	7	49	5	20
	n (negative)=	49	10	9	56	0	49	47	36	52	10	54	39			Slc17a7		Gad2		Gad1		NOS1		GADs		CB		PV		CR		NPY		VIP		SOM		CCK
																RS	Adapting-Npy	RS	Adapting-Npy	RS	Adapting-Npy	RS	Adapting-Npy	RS	Adapting-Npy	RS	Adapting-Npy	RS	Adapting-Npy	RS	Adapting-Npy	RS	Adapting-Npy	RS	Adapting-Npy	RS	Adapting-Npy	RS	Adapting-Npy
		Adapting-Sst													n (positive)=	59	19	3	51	4	51	0	12	6	54	25	6	21	12	0	9	0	31	0	6	6	5	21	10
		Slc17a7	Gad2	Gad1	Nos1	Gads	Calb1	Pvalb	Calb2	Npy	Vip	Sst	Cck		n (negative)=	4	37	60	5	59	5	63	44	57	2	38	50	42	44	63	47	63	25	63	50	57	51	42	46
		0.333333	0.875	0.875	0.125	1	0.875	0.375	0.0416667	0.666667	0.0416667	0.916667	0.0416667		p exact Fisher, bilatéral	0		0		0		0.0001		0		0.0003		0.1582		0.0008		0		0.0094		1		0.0625
	N=	24	24	24	24	24	24	24	24	24	24	24	24
	n (positive)=	8	21	21	3	24	21	9	1	16	1	22	1			Slc17a7		Gad2		Gad1		NOS1		GADs		CB		PV		CR		NPY		VIP		SOM		CCK
	n (negative)=	16	3	3	21	0	3	15	23	8	23	2	23			RS	FS-Pvalb	RS	FS-Pvalb	RS	FS-Pvalb	RS	FS-Pvalb	RS	FS-Pvalb	RS	FS-Pvalb	RS	FS-Pvalb	RS	FS-Pvalb	RS	FS-Pvalb	RS	FS-Pvalb	RS	FS-Pvalb	RS	FS-Pvalb
															n (positive)=	59	12	3	28	4	36	0	3	6	38	25	19	21	37	0	1	0	9	0	1	6	2	21	3
		Adapting-Npy													n (negative)=	4	26	60	10	59	2	63	35	57	0	38	19	42	1	63	37	63	29	63	37	57	36	42	35
		Slc17a7	Gad2	Gad1	Nos1	Gads	Calb1	Pvalb	Calb2	Npy	Vip	Sst	Cck		p exact Fisher, bilatéral	0		0		0		0.0506		0		0.4077		0		0.3762		0.0001		0.3762		0.7066		0.0036
		0.339286	0.910714	0.910714	0.214286	0.964286	0.107143	0.214286	0.160714	0.553571	0.107143	0.0892857	0.178571
	N=	56	56	56	56	56	56	56	56	56	56	56	56			Slc17a7		Gad2		Gad1		NOS1		GADs		CB		PV		CR		NPY		VIP		SOM		CCK
	n (positive)=	19	51	51	12	54	6	12	9	31	6	5	10			IB	Bursting-Vip	IB	Bursting-Vip	IB	Bursting-Vip	IB	Bursting-Vip	IB	Bursting-Vip	IB	Bursting-Vip	IB	Bursting-Vip	IB	Bursting-Vip	IB	Bursting-Vip	IB	Bursting-Vip	IB	Bursting-Vip	IB	Bursting-Vip
	n (negative)=	37	5	5	44	2	50	44	47	25	50	51	46		n (positive)=	10	12	1	22	1	21	0	0	1	27	4	2	2	3	0	7	1	2	0	24	0	3	1	6
															n (negative)=	0	15	9	5	9	6	10	27	9	0	6	25	8	24	10	20	9	25	10	3	10	24	9	21
		FS-Pvalb													p exact Fisher, bilatéral	0.0019		0.0001		0.0003		N/A		0		0.0347		0.5974		0.1551		1		0		0.5483		0.6471
		Slc17a7	Gad2	Gad1	Nos1	Gads	Calb1	Pvalb	Calb2	Npy	Vip	Sst	Cck
		0.315789	0.736842	0.947368	0.0789474	1	0.5	0.973684	0.0263158	0.236842	0.0263158	0.0526316	0.0789474
	N=	38	38	38	38	38	38	38	38	38	38	38	38			Slc17a7		Gad2		Gad1		NOS1		GADs		CB		PV		CR		NPY		VIP		SOM		CCK
	n (positive)=	12	28	36	3	38	19	37	1	9	1	2	3			IB	Adapting-Vip	IB	Adapting-Vip	IB	Adapting-Vip	IB	Adapting-Vip	IB	Adapting-Vip	IB	Adapting-Vip	IB	Adapting-Vip	IB	Adapting-Vip	IB	Adapting-Vip	IB	Adapting-Vip	IB	Adapting-Vip	IB	Adapting-Vip
	n (negative)=	26	10	2	35	0	19	1	37	29	37	36	35		n (positive)=	10	10	1	49	1	50	0	3	1	59	4	10	2	12	0	23	1	7	0	49	0	5	1	20
															n (negative)=	0	49	9	10	9	9	10	56	9	0	6	49	8	47	10	36	9	52	10	10	10	54	9	39
															p exact Fisher, bilatéral	0		0		0		1		0		0.1091		1		0.0245		1		0		1		0.263
																Slc17a7		Gad2		Gad1		NOS1		GADs		CB		PV		CR		NPY		VIP		SOM		CCK
																IB	Adapting-Sst	IB	Adapting-Sst	IB	Adapting-Sst	IB	Adapting-Sst	IB	Adapting-Sst	IB	Adapting-Sst	IB	Adapting-Sst	IB	Adapting-Sst	IB	Adapting-Sst	IB	Adapting-Sst	IB	Adapting-Sst	IB	Adapting-Sst
															n (positive)=	10	8	1	21	1	21	0	3	1	24	4	21	2	9	0	1	1	16	0	1	0	22	1	1
															n (negative)=	0	16	9	3	9	3	10	21	9	0	6	3	8	15	10	23	9	8	10	23	10	2	9	23
															p exact Fisher, bilatéral	0.0004		0		0		0.5388		0		0.0088		0.4375		1		0.0066		1		0		0.508
																Slc17a7		Gad2		Gad1		NOS1		GADs		CB		PV		CR		NPY		VIP		SOM		CCK
																IB	Adapting-Npy	IB	Adapting-Npy	IB	Adapting-Npy	IB	Adapting-Npy	IB	Adapting-Npy	IB	Adapting-Npy	IB	Adapting-Npy	IB	Adapting-Npy	IB	Adapting-Npy	IB	Adapting-Npy	IB	Adapting-Npy	IB	Adapting-Npy
															n (positive)=	10	19	1	51	1	51	0	12	1	54	4	6	2	12	0	9	1	31	0	6	0	5	1	10
															n (negative)=	0	37	9	5	9	5	10	44	9	2	6	50	8	44	10	47	9	25	10	50	10	51	9	46
															p exact Fisher, bilatéral	0.0001		0		0		0.1874		0		0.0373		1		0.3343		0.0134		0.5796		1		1
																Slc17a7		Gad2		Gad1		NOS1		GADs		CB		PV		CR		NPY		VIP		SOM		CCK
																IB	FS-Pvalb	IB	FS-Pvalb	IB	FS-Pvalb	IB	FS-Pvalb	IB	FS-Pvalb	IB	FS-Pvalb	IB	FS-Pvalb	IB	FS-Pvalb	IB	FS-Pvalb	IB	FS-Pvalb	IB	FS-Pvalb	IB	FS-Pvalb
															n (positive)=	10	12	1	28	1	36	0	3	1	38	4	19	2	37	0	1	1	9	0	1	0	2	1	3
															n (negative)=	0	26	9	10	9	2	10	35	9	0	6	19	8	1	10	37	9	29	10	37	10	36	9	35
															p exact Fisher, bilatéral	0.0001		0.0004		0		1		0		0.7267		0		1		0.6635		1		1		1
																Slc17a7		Gad2		Gad1		NOS1		GADs		CB		PV		CR		NPY		VIP		SOM		CCK
																Bursting-Vip	Adapting-Vip	Bursting-Vip	Adapting-Vip	Bursting-Vip	Adapting-Vip	Bursting-Vip	Adapting-Vip	Bursting-Vip	Adapting-Vip	Bursting-Vip	Adapting-Vip	Bursting-Vip	Adapting-Vip	Bursting-Vip	Adapting-Vip	Bursting-Vip	Adapting-Vip	Bursting-Vip	Adapting-Vip	Bursting-Vip	Adapting-Vip	Bursting-Vip	Adapting-Vip
															n (positive)=	12	10	22	49	21	50	0	3	27	59	2	10	3	12	7	23	2	7	24	49	3	5	6	20
															n (negative)=	15	49	5	10	6	9	27	56	0	0	25	49	24	47	20	36	25	52	3	10	24	54	21	39
															p exact Fisher, bilatéral	0.0149		1		0.5417		0.5486		N/A		0.325		0.3709		0.3304		0.7134		0.7466		0.7019		0.3206
																Slc17a7		Gad2		Gad1		NOS1		GADs		CB		PV		CR		NPY		VIP		SOM		CCK
																Bursting-Vip	Adapting-Sst	Bursting-Vip	Adapting-Sst	Bursting-Vip	Adapting-Sst	Bursting-Vip	Adapting-Sst	Bursting-Vip	Adapting-Sst	Bursting-Vip	Adapting-Sst	Bursting-Vip	Adapting-Sst	Bursting-Vip	Adapting-Sst	Bursting-Vip	Adapting-Sst	Bursting-Vip	Adapting-Sst	Bursting-Vip	Adapting-Sst	Bursting-Vip	Adapting-Sst
															n (positive)=	12	8	22	21	21	21	0	3	27	24	2	21	3	9	7	1	2	16	24	1	3	22	6	1
															n (negative)=	15	16	5	3	6	3	27	21	0	0	25	3	24	15	20	23	25	8	3	23	24	2	21	23
															p exact Fisher, bilatéral	0.5667		0.7071		0.4728		0.0972		N/A		0		0.0456		0.0528		0		0		0		0.1034
																Slc17a7		Gad2		Gad1		NOS1		GADs		CB		PV		CR		NPY		VIP		SOM		CCK
																Bursting-Vip	Adapting-Npy	Bursting-Vip	Adapting-Npy	Bursting-Vip	Adapting-Npy	Bursting-Vip	Adapting-Npy	Bursting-Vip	Adapting-Npy	Bursting-Vip	Adapting-Npy	Bursting-Vip	Adapting-Npy	Bursting-Vip	Adapting-Npy	Bursting-Vip	Adapting-Npy	Bursting-Vip	Adapting-Npy	Bursting-Vip	Adapting-Npy	Bursting-Vip	Adapting-Npy
															n (positive)=	12	19	22	51	21	51	0	12	27	54	2	6	3	12	7	9	2	31	24	6	3	5	6	10
															n (negative)=	15	37	5	5	6	5	27	44	0	2	25	50	24	44	20	47	25	25	3	50	24	51	21	46
															p exact Fisher, bilatéral	0.468		0.2819		0.1633		0.0072		1		1		0.3646		0.3741		0		0		0.7111		0.7675
																Slc17a7		Gad2		Gad1		NOS1		GADs		CB		PV		CR		NPY		VIP		SOM		CCK
																Bursting-Vip	FS-Pvalb	Bursting-Vip	FS-Pvalb	Bursting-Vip	FS-Pvalb	Bursting-Vip	FS-Pvalb	Bursting-Vip	FS-Pvalb	Bursting-Vip	FS-Pvalb	Bursting-Vip	FS-Pvalb	Bursting-Vip	FS-Pvalb	Bursting-Vip	FS-Pvalb	Bursting-Vip	FS-Pvalb	Bursting-Vip	FS-Pvalb	Bursting-Vip	FS-Pvalb
															n (positive)=	12	12	22	28	21	36	0	3	27	38	2	19	3	37	7	1	2	9	24	1	3	2	6	3
															n (negative)=	15	26	5	10	6	2	27	35	0	0	25	19	24	1	20	37	25	29	3	37	24	36	21	35
															p exact Fisher, bilatéral	0.3103		0.5579		0.058		0.2601		N/A		0.0003		0		0.0071		0.1045		0		0.6415		0.1439
																Slc17a7		Gad2		Gad1		NOS1		GADs		CB		PV		CR		NPY		VIP		SOM		CCK
																Adapting-Vip	Adapting-Sst	Adapting-Vip	Adapting-Sst	Adapting-Vip	Adapting-Sst	Adapting-Vip	Adapting-Sst	Adapting-Vip	Adapting-Sst	Adapting-Vip	Adapting-Sst	Adapting-Vip	Adapting-Sst	Adapting-Vip	Adapting-Sst	Adapting-Vip	Adapting-Sst	Adapting-Vip	Adapting-Sst	Adapting-Vip	Adapting-Sst	Adapting-Vip	Adapting-Sst
															n (positive)=	10	8	49	21	50	21	3	3	59	24	10	21	12	9	23	1	7	16	49	1	5	22	20	1
															n (negative)=	49	16	10	3	9	3	56	21	0	0	49	3	47	15	36	23	52	8	10	23	54	2	39	23
															p exact Fisher, bilatéral	0.1413		0.7476		1		0.3489		N/A		0		0.1621		0.0011		0		0		0		0.0046
																Slc17a7		Gad2		Gad1		NOS1		GADs		CB		PV		CR		NPY		VIP		SOM		CCK
																Adapting-Vip	Adapting-Npy	Adapting-Vip	Adapting-Npy	Adapting-Vip	Adapting-Npy	Adapting-Vip	Adapting-Npy	Adapting-Vip	Adapting-Npy	Adapting-Vip	Adapting-Npy	Adapting-Vip	Adapting-Npy	Adapting-Vip	Adapting-Npy	Adapting-Vip	Adapting-Npy	Adapting-Vip	Adapting-Npy	Adapting-Vip	Adapting-Npy	Adapting-Vip	Adapting-Npy
															n (positive)=	10	19	49	51	50	51	3	12	59	54	10	6	12	12	23	9	7	31	49	6	5	5	20	10
															n (negative)=	49	37	10	5	9	5	56	44	0	2	49	50	47	44	36	47	52	25	10	50	54	51	39	46
															p exact Fisher, bilatéral	0.0525		0.2706		0.3957		0.012		0.2349		0.4227		1		0.0071		0		0		1		0.0583
																Slc17a7		Gad2		Gad1		NOS1		GADs		CB		PV		CR		NPY		VIP		SOM		CCK
																Adapting-Vip	FS-Pvalb	Adapting-Vip	FS-Pvalb	Adapting-Vip	FS-Pvalb	Adapting-Vip	FS-Pvalb	Adapting-Vip	FS-Pvalb	Adapting-Vip	FS-Pvalb	Adapting-Vip	FS-Pvalb	Adapting-Vip	FS-Pvalb	Adapting-Vip	FS-Pvalb	Adapting-Vip	FS-Pvalb	Adapting-Vip	FS-Pvalb	Adapting-Vip	FS-Pvalb
															n (positive)=	10	12	49	28	50	36	3	3	59	38	10	19	12	37	23	1	7	9	49	1	5	2	20	3
															n (negative)=	49	26	10	10	9	2	56	35	0	0	49	19	47	1	36	37	52	29	10	37	54	36	39	35
															p exact Fisher, bilatéral	0.1354		0.3091		0.1924		0.6762		N/A		0.0007		0		0		0.1633		0		0.7011		0.0033
																Slc17a7		Gad2		Gad1		NOS1		GADs		CB		PV		CR		NPY		VIP		SOM		CCK
																Adapting-Sst	Adapting-Npy	Adapting-Sst	Adapting-Npy	Adapting-Sst	Adapting-Npy	Adapting-Sst	Adapting-Npy	Adapting-Sst	Adapting-Npy	Adapting-Sst	Adapting-Npy	Adapting-Sst	Adapting-Npy	Adapting-Sst	Adapting-Npy	Adapting-Sst	Adapting-Npy	Adapting-Sst	Adapting-Npy	Adapting-Sst	Adapting-Npy	Adapting-Sst	Adapting-Npy
															n (positive)=	8	19	21	51	21	51	3	12	24	54	21	6	9	12	1	9	16	31	1	6	22	5	1	10
															n (negative)=	16	37	3	5	3	5	21	44	0	2	3	50	15	44	23	47	8	25	23	50	2	51	23	46
															p exact Fisher, bilatéral	1		0.3647		0.6909		0.5335		1		0		0.1686		0.2673		0.4586		0.6681		0		0.1591
																Slc17a7		Gad2		Gad1		NOS1		GADs		CB		PV		CR		NPY		VIP		SOM		CCK
																Adapting-Sst	FS-Pvalb	Adapting-Sst	FS-Pvalb	Adapting-Sst	FS-Pvalb	Adapting-Sst	FS-Pvalb	Adapting-Sst	FS-Pvalb	Adapting-Sst	FS-Pvalb	Adapting-Sst	FS-Pvalb	Adapting-Sst	FS-Pvalb	Adapting-Sst	FS-Pvalb	Adapting-Sst	FS-Pvalb	Adapting-Sst	FS-Pvalb	Adapting-Sst	FS-Pvalb
															n (positive)=	8	12	21	28	21	36	3	3	24	38	21	19	9	37	1	1	16	9	1	1	22	2	1	3
															n (negative)=	16	26	3	10	3	2	21	35	0	0	3	19	15	1	23	37	8	29	23	37	2	36	23	35
															p exact Fisher, bilatéral	1		0.3369		0.3664		0.6686		N/A		0.0029		0		1		0.0013		1		0		1
																Slc17a7		Gad2		Gad1		NOS1		GADs		CB		PV		CR		NPY		VIP		SOM		CCK
																Adapting-Npy	FS-Pvalb	Adapting-Npy	FS-Pvalb	Adapting-Npy	FS-Pvalb	Adapting-Npy	FS-Pvalb	Adapting-Npy	FS-Pvalb	Adapting-Npy	FS-Pvalb	Adapting-Npy	FS-Pvalb	Adapting-Npy	FS-Pvalb	Adapting-Npy	FS-Pvalb	Adapting-Npy	FS-Pvalb	Adapting-Npy	FS-Pvalb	Adapting-Npy	FS-Pvalb
															n (positive)=	19	12	51	28	51	36	12	3	54	38	6	19	12	37	9	1	31	9	6	1	5	2	10	3
															n (negative)=	37	26	5	10	5	2	44	35	2	0	50	19	44	1	47	37	25	29	50	37	51	36	46	35
															p exact Fisher, bilatéral	1		0.0419		0.6973		0.0926		0.5132		0		0		0.0452		0.0029		0.235		0.6973		0.2291
[truncated: 32 more columns]
