# Supplementary material for: Lactate is an energy substrate for rodent cortical neurons and enhances their firing activity
Source: eLife. 2021 Nov 12;10:e71424. doi: 10.7554/eLife.71424 (PMC8651295; doi:10.7554/eLife.71424)
Supplement: Source data 3. [file elife-71424-supp10.xls]

## Sheet: Feuil1
	*	**	***	RMP (mV)				Rin (MW)				t (ms)				Cm (pF)				DG sag (%)
k \ a=	0.05	0.01	0.001	Comparison		U=	p=	Comparison		U=	p=	Comparison		U=	p=	Comparison		U=	p=	Comparison		U=	p=
1	0.00238095	0.00047619	4.7619e-05	RS	Adapting-Sst	191	6.55252e-09	Adapting-Vip	FS-Pvalb	44	6.80843e-22	RS	FS-Pvalb	193	4.12453e-15	RS	Bursting-Vip	137	0	IB	Adapting-Npy	7	4.2658e-10
2	0.0025	0.0005	5e-05	RS	Adapting-Vip	798	1.71991e-08	Bursting-Vip	FS-Pvalb	28	2.54924e-14	Adapting-Npy	FS-Pvalb	341	3.65286e-09	RS	Adapting-Vip	213	7.55873e-22	Adapting-Vip	Adapting-Sst	152	9.92503e-10
3	0.00263158	0.000526316	5.26316e-05	Adapting-Sst	FS-Pvalb	185	4.95013e-05	RS	Adapting-Vip	531	3.52278e-13	Adapting-Vip	FS-Pvalb	378	6.82072e-09	Adapting-Vip	FS-Pvalb	225	3.73297e-13	IB	Adapting-Vip	12	1.5822e-09
4	0.00277778	0.000555556	5.55556e-05	Adapting-Sst	Adapting-Npy	306.5	7.48138e-05	Adapting-Npy	FS-Pvalb	246	7.96429e-12	Bursting-Vip	FS-Pvalb	133	5.93648e-08	Adapting-Vip	Adapting-Npy	577	2.37501e-10	Bursting-Vip	Adapting-Sst	41	2.22358e-09
5	0.00294118	0.000588235	5.88235e-05	RS	Adapting-Npy	1084	0.000245267	RS	Bursting-Vip	297	2.84352e-07	IB	FS-Pvalb	22	1.18947e-06	IB	Adapting-Vip	12	1.5822e-09	IB	Bursting-Vip	1	1.14834e-08
6	0.003125	0.000625	6.25e-05	IB	Adapting-Sst	33	0.00054147	Adapting-Vip	Adapting-Npy	765	3.03799e-07	Adapting-Sst	FS-Pvalb	191	7.53195e-05	Adapting-Vip	Adapting-Sst	168	3.90508e-09	IB	FS-Pvalb	7	1.376e-08
7	0.00333333	0.000666667	6.66667e-05	RS	Bursting-Vip	479.5	0.000887	RS	FS-Pvalb	539	1.87259e-06	RS	Adapting-Npy	1333	0.0215219	RS	Adapting-Npy	704	3.93992e-09	Adapting-Sst	Adapting-Npy	182	3.34764e-08
8	0.00357143	0.000714286	7.14286e-05	RS	FS-Pvalb	761.5	0.00202792	Adapting-Vip	Adapting-Sst	263.5	2.8412e-06	RS	Adapting-Vip	1415	0.0228604	Bursting-Vip	FS-Pvalb	178	2.91416e-06	Adapting-Sst	FS-Pvalb	113	9.91534e-08
9	0.00384615	0.000769231	7.69231e-05	IB	Adapting-Vip	136	0.00557409	Adapting-Sst	FS-Pvalb	160.5	7.45016e-06	RS	Adapting-Sst	554	0.055288	RS	FS-Pvalb	567	5.43533e-06	RS	Bursting-Vip	369	1.1288e-05
10	0.00416667	0.000833333	8.33333e-05	Bursting-Vip	Adapting-Sst	190	0.0108838	IB	FS-Pvalb	40	3.52567e-05	IB	Adapting-Npy	180	0.0749124	IB	Bursting-Vip	18	8.48046e-06	RS	Adapting-Sst	354	8.49394e-05
11	0.00454545	0.000909091	9.09091e-05	Adapting-Vip	Adapting-Npy	1203.5	0.0117091	Bursting-Vip	Adapting-Sst	132	0.000182692	IB	Adapting-Sst	78	0.117941	RS	Adapting-Sst	354	8.49394e-05	RS	Adapting-Vip	1112	0.000104124
12	0.005	0.001	0.0001	Adapting-Vip	FS-Pvalb	794	0.015325	Bursting-Vip	Adapting-Npy	387	0.000245657	IB	Adapting-Vip	203	0.119985	Bursting-Vip	Adapting-Sst	125	9.87825e-05	RS	IB	96	0.00019
13	0.00555556	0.00111111	0.000111111	Adapting-Vip	Adapting-Sst	528.5	0.0712262	IB	Adapting-Vip	107	0.000817805	Bursting-Vip	Adapting-Vip	679	0.278164	Bursting-Vip	Adapting-Npy	397	0.000369494	Bursting-Vip	Adapting-Npy	396	0.000354921
14	0.00625	0.00125	0.000125	IB	Bursting-Vip	88	0.112773	IB	Bursting-Vip	60	0.0091776	Bursting-Vip	Adapting-Sst	270	0.315579	IB	Adapting-Npy	146	0.0153094	RS	FS-Pvalb	790	0.00404631
15	0.00714286	0.00142857	0.000142857	IB	Adapting-Npy	197	0.141886	RS	Adapting-Npy	1330	0.020616	Bursting-Vip	Adapting-Npy	664	0.376083	RS	IB	211	0.097263	RS	Adapting-Npy	1292	0.0116984
16	0.00833333	0.00166667	0.000166667	IB	FS-Pvalb	133	0.153639	Adapting-Sst	Adapting-Npy	555	0.222949	IB	Bursting-Vip	111	0.42777	IB	Adapting-Sst	78	0.117941	Bursting-Vip	FS-Pvalb	336	0.0180478
17	0.01	0.002	0.0002	Bursting-Vip	Adapting-Vip	666	0.227948	RS	IB	251.5	0.313332	RS	Bursting-Vip	765	0.456544	IB	FS-Pvalb	129	0.125932	Bursting-Vip	Adapting-Vip	588	0.052546
18	0.0125	0.0025	0.00025	Bursting-Vip	FS-Pvalb	457	0.462695	IB	Adapting-Sst	104	0.563982	RS	IB	279	0.574355	Adapting-Npy	FS-Pvalb	866	0.128549	Adapting-Vip	Adapting-Npy	1328	0.070169
19	0.0166667	0.00333333	0.000333333	Bursting-Vip	Adapting-Npy	684	0.489434	RS	Adapting-Sst	710	0.667719	Adapting-Sst	Adapting-Npy	618	0.576762	Bursting-Vip	Adapting-Vip	643	0.155408	Adapting-Npy	FS-Pvalb	942	0.350963
20	0.025	0.005	0.0005	RS	IB	275	0.531857	IB	Adapting-Npy	268	0.839518	Adapting-Vip	Adapting-Sst	684	0.814665	Adapting-Sst	Adapting-Npy	569	0.283985	Adapting-Vip	FS-Pvalb	1025	0.482158
21	0.05	0.01	0.001	Adapting-Npy	FS-Pvalb	1039.5	0.851021	Bursting-Vip	Adapting-Vip	783	0.904327	Adapting-Vip	Adapting-Npy	1637	0.935588	Adapting-Sst	FS-Pvalb	454	0.982841	IB	Adapting-Sst	117	0.925994
