# Supplementary material for: Lactate is an energy substrate for rodent cortical neurons and enhances their firing activity
Source: eLife. 2021 Nov 12;10:e71424. doi: 10.7554/eLife.71424 (PMC8651295; doi:10.7554/eLife.71424)
Supplement: Source data 4. [file elife-71424-supp11.xls]

## Sheet: Feuil1
	*	**	***	Rheobase (pA)				1st spike delay (ms)				mthreshold (Hz/s)				Cthreshold (Hz)
k \ a=	0.05	0.01	0.001	Comparison		U=	p=	Comparison		U=	p=	Comparison		U=	p=	Comparison		U=	p=
1	0.00238095	0.00047619	4.7619e-05	Adapting-Vip	FS-Pvalb	93	1.00769e-18	Adapting-Vip	FS-Pvalb	538	9.40398e-06	Bursting-Vip	Adapting-Npy	17	4.75641e-19	Bursting-Vip	Adapting-Npy	18	6.26732e-19
2	0.0025	0.0005	5e-05	RS	Adapting-Vip	527	2.90467e-13	RS	Adapting-Vip	1066	3.61538e-05	RS	Bursting-Vip	90	1.17949e-14	RS	Bursting-Vip	49	3.13065e-17
3	0.00263158	0.000526316	5.26316e-05	Bursting-Vip	FS-Pvalb	74	6.80076e-11	Bursting-Vip	FS-Pvalb	214	3.82175e-05	Bursting-Vip	Adapting-Vip	111	5.95232e-13	Bursting-Vip	Adapting-Vip	98	1.33952e-13
4	0.00277778	0.000555556	5.55556e-05	Adapting-Sst	FS-Pvalb	63	2.01092e-10	RS	Bursting-Vip	414	7.93454e-05	Bursting-Vip	FS-Pvalb	52	2.46396e-12	IB	Adapting-Vip	0	5.88179e-12
5	0.00294118	0.000588235	5.88235e-05	Adapting-Npy	FS-Pvalb	322	1.19898e-09	Bursting-Vip	Adapting-Npy	386	0.000235663	IB	Adapting-Npy	0	9.47955e-12	IB	Adapting-Npy	0	9.47955e-12
6	0.003125	0.000625	6.25e-05	Adapting-Vip	Adapting-Npy	652.5	5.21494e-09	Adapting-Vip	Adapting-Npy	1008	0.000261221	IB	Adapting-Vip	3	4.11725e-11	RS	IB	5	6.11596e-11
7	0.00333333	0.000666667	6.66667e-05	RS	FS-Pvalb	495	3.0983e-07	RS	FS-Pvalb	756	0.00179178	RS	IB	5	6.11596e-11	Adapting-Npy	FS-Pvalb	299	2.90346e-10
8	0.00357143	0.000714286	7.14286e-05	RS	Adapting-Sst	271	1.28751e-06	Adapting-Sst	FS-Pvalb	250	0.0025332	IB	FS-Pvalb	3	2.14044e-09	IB	FS-Pvalb	0	3.05777e-10
9	0.00384615	0.000769231	7.69231e-05	IB	FS-Pvalb	43	5.58716e-05	IB	Bursting-Vip	69	0.0233183	IB	Adapting-Sst	0	1.52523e-08	RS	FS-Pvalb	370	7.15514e-10
10	0.00416667	0.000833333	8.33333e-05	Adapting-Sst	Adapting-Npy	311	9.5564e-05	Adapting-Npy	FS-Pvalb	789	0.0339828	Bursting-Vip	Adapting-Sst	61	6.07455e-08	RS	Adapting-Vip	732	1.67485e-09
11	0.00454545	0.000909091	9.09091e-05	RS	Bursting-Vip	437	0.000196263	IB	Adapting-Vip	173	0.0369781	Adapting-Vip	Adapting-Npy	945	5.71629e-05	Bursting-Vip	FS-Pvalb	105	3.20989e-09
12	0.005	0.001	0.0001	IB	Adapting-Vip	104	0.000652514	IB	FS-Pvalb	116	0.0613467	RS	Adapting-Npy	1083	0.000239956	Bursting-Vip	Adapting-Sst	47	6.47834e-09
13	0.00555556	0.00111111	0.000111111	Bursting-Vip	Adapting-Npy	477	0.00625878	RS	Adapting-Sst	570	0.078058	Adapting-Sst	Adapting-Npy	346	0.000472519	IB	Adapting-Sst	0	1.52523e-08
14	0.00625	0.00125	0.000125	IB	Adapting-Sst	56	0.0145597	Adapting-Sst	Adapting-Npy	507	0.0841659	Adapting-Sst	FS-Pvalb	243	0.00176021	Adapting-Vip	Adapting-Npy	797	8.55721e-07
15	0.00714286	0.00142857	0.000142857	Bursting-Vip	Adapting-Vip	562	0.0288312	Bursting-Vip	Adapting-Sst	246	0.144653	RS	FS-Pvalb	763	0.00213004	RS	Adapting-Sst	430	0.00167583
16	0.00833333	0.00166667	0.000166667	Bursting-Vip	Adapting-Sst	219	0.0479831	IB	Adapting-Sst	91	0.286578	Adapting-Vip	FS-Pvalb	713	0.00233758	Adapting-Sst	Adapting-Npy	379	0.00179638
17	0.01	0.002	0.0002	RS	Adapting-Npy	1495	0.15337	Bursting-Vip	Adapting-Vip	683	0.295007	IB	Bursting-Vip	70	0.0256571	Adapting-Vip	FS-Pvalb	733	0.00385594
18	0.0125	0.0025	0.00025	IB	Bursting-Vip	94	0.168704	Adapting-Vip	Adapting-Sst	614.5	0.350074	RS	Adapting-Vip	1535	0.0980763	Adapting-Sst	FS-Pvalb	301	0.0247694
19	0.0166667	0.00333333	0.000333333	RS	IB	243	0.255582	RS	Adapting-Npy	1613	0.424379	RS	Adapting-Sst	589	0.114261	RS	Adapting-Npy	1366	0.0339772
20	0.025	0.005	0.0005	Adapting-Vip	Adapting-Sst	633.5	0.456875	IB	Adapting-Npy	242	0.508162	Adapting-Npy	FS-Pvalb	870	0.136531	IB	Bursting-Vip	103	0.286434
21	0.05	0.01	0.001	IB	Adapting-Npy	254	0.653134	RS	IB	299	0.806527	Adapting-Vip	Adapting-Sst	617	0.365812	Adapting-Vip	Adapting-Sst	705	0.980107
