# Supplementary material for: Lactate is an energy substrate for rodent cortical neurons and enhances their firing activity
Source: eLife. 2021 Nov 12;10:e71424. doi: 10.7554/eLife.71424 (PMC8651295; doi:10.7554/eLife.71424)
Supplement: Source data 5. [file elife-71424-supp12.xls]

## Sheet: Feuil1
	*	**	***	Hump (mV)				Asat (Hz)				tsat (ms)				Csat (Hz)				msat (Hz/s)
k \ a=	0.05	0.01	0.001	Comparison		U=	p=	Comparison		U=	p=	Comparison		U=	p=	Comparison		U=	p=	Comparison		U=	p=
1	0.00238095	0.00047619	4.7619e-05	RS	FS-Pvalb	56.5	7.71634e-22	Adapting-Npy	FS-Pvalb	227	1.93077e-12	RS	Adapting-Sst	145	1.42209e-10	RS	Adapting-Sst	147	0	RS	Adapting-Vip	768	6.11422e-09
2	0.0025	0.0005	5e-05	RS	Adapting-Vip	380	1.03635e-16	RS	FS-Pvalb	384	1.52995e-09	RS	IB	30	6.61329e-08	RS	FS-Pvalb	0	2.2002e-28	IB	FS-Pvalb	7	1.376e-08
3	0.00263158	0.000526316	5.26316e-05	RS	Adapting-Sst	92	5.51824e-13	IB	FS-Pvalb	9	2.96604e-08	RS	Adapting-Npy	949	9.32389e-06	Adapting-Npy	FS-Pvalb	16	6.25842e-24	IB	Adapting-Vip	30	1.20841e-07
4	0.00277778	0.000555556	5.55556e-05	Adapting-Npy	FS-Pvalb	213	6.4672e-13	Adapting-Vip	FS-Pvalb	484	1.07283e-06	Adapting-Sst	Adapting-Npy	285	2.55006e-05	RS	Adapting-Vip	441	3.46676e-15	IB	Adapting-Npy	34	4.03829e-07
5	0.00294118	0.000588235	5.88235e-05	IB	Adapting-Vip	0	5.88179e-12	Bursting-Vip	FS-Pvalb	213	3.57777e-05	Adapting-Sst	FS-Pvalb	186	5.31353e-05	Adapting-Vip	FS-Pvalb	280	1.9491e-11	RS	FS-Pvalb	505	4.72868e-07
6	0.003125	0.000625	6.25e-05	Adapting-Vip	FS-Pvalb	317	2.08382e-10	Adapting-Sst	FS-Pvalb	215	0.000357573	Adapting-Vip	Adapting-Sst	326	7.72256e-05	RS	Adapting-Npy	592	4.32624e-11	IB	Adapting-Sst	9	1.47947e-06
7	0.00333333	0.000666667	6.66667e-05	IB	FS-Pvalb	0	3.05777e-10	IB	Adapting-Vip	149	0.0115378	RS	Adapting-Vip	1147	0.000222592	Adapting-Sst	FS-Pvalb	57	8.04828e-11	Adapting-Vip	Adapting-Npy	827	2.16441e-06
8	0.00357143	0.000714286	7.14286e-05	IB	Adapting-Npy	7	4.2658e-10	IB	Adapting-Sst	62	0.0280206	IB	Adapting-Npy	91	0.000367436	Bursting-Vip	FS-Pvalb	79	1.33844e-10	IB	Bursting-Vip	25	4.32521e-05
9	0.00384615	0.000769231	7.69231e-05	RS	Adapting-Npy	656	6.20058e-10	Adapting-Vip	Adapting-Npy	1272	0.0333537	Adapting-Npy	FS-Pvalb	651	0.00128757	IB	FS-Pvalb	0	3.05777e-10	Adapting-Npy	FS-Pvalb	561	7.55504e-05
10	0.00416667	0.000833333	8.33333e-05	Bursting-Vip	FS-Pvalb	109	5.00987e-09	RS	Adapting-Vip	1448	0.0353562	Bursting-Vip	Adapting-Sst	158	0.00140293	IB	Adapting-Npy	9	9.19516e-10	RS	IB	91	0.000125285
11	0.00454545	0.000909091	9.09091e-05	IB	Bursting-Vip	1	1.14834e-08	IB	Bursting-Vip	77	0.0480684	IB	FS-Pvalb	76	0.00288542	IB	Adapting-Vip	21	1.81336e-08	RS	Adapting-Sst	467	0.00559921
12	0.005	0.001	0.0001	IB	Adapting-Sst	0	1.52523e-08	IB	Adapting-Npy	184	0.0878109	IB	Adapting-Vip	128	0.00342923	IB	Adapting-Sst	2	6.1009e-08	RS	Bursting-Vip	541	0.00600719
13	0.00555556	0.00111111	0.000111111	RS	IB	49	1.3881e-06	Adapting-Sst	Adapting-Npy	517	0.105094	Adapting-Vip	FS-Pvalb	730	0.00358262	RS	Bursting-Vip	298	3.00875e-07	Adapting-Vip	Adapting-Sst	473	0.017781
14	0.00625	0.00125	0.000125	RS	Bursting-Vip	395	3.5883e-05	RS	Adapting-Sst	597	0.132938	IB	Bursting-Vip	54	0.00455336	IB	Bursting-Vip	14	2.83639e-06	RS	Adapting-Npy	1380	0.040871
15	0.00714286	0.00142857	0.000142857	Adapting-Sst	Adapting-Npy	326	0.000194211	RS	IB	246	0.276335	RS	Bursting-Vip	543	0.0063525	Adapting-Vip	Adapting-Npy	1010	0.000273458	Bursting-Vip	Adapting-Npy	552	0.0474713
16	0.00833333	0.00166667	0.000166667	Bursting-Vip	Adapting-Sst	141	0.000385864	RS	Bursting-Vip	727	0.280682	Bursting-Vip	FS-Pvalb	346	0.0259357	RS	IB	111	0.000604148	Bursting-Vip	Adapting-Vip	626	0.11407
17	0.01	0.002	0.0002	Adapting-Sst	FS-Pvalb	262	0.00458836	Bursting-Vip	Adapting-Npy	658	0.345479	RS	FS-Pvalb	999	0.166958	Adapting-Sst	Adapting-Npy	407	0.0049509	Adapting-Sst	FS-Pvalb	347	0.117407
18	0.0125	0.0025	0.00025	Bursting-Vip	Adapting-Vip	512	0.00766687	Bursting-Vip	Adapting-Vip	744	0.630508	Adapting-Vip	Adapting-Npy	1599	0.769795	Bursting-Vip	Adapting-Vip	643	0.155408	Adapting-Sst	Adapting-Npy	552	0.211176
19	0.0166667	0.00333333	0.000333333	Adapting-Vip	Adapting-Npy	1206.5	0.0122922	Bursting-Vip	Adapting-Sst	300	0.660111	Bursting-Vip	Adapting-Npy	732	0.820445	Bursting-Vip	Adapting-Npy	612	0.164036	Adapting-Vip	FS-Pvalb	962	0.242738
20	0.025	0.005	0.0005	Adapting-Vip	Adapting-Sst	469	0.015877	RS	Adapting-Npy	1682	0.665487	Bursting-Vip	Adapting-Vip	779	0.875099	Bursting-Vip	Adapting-Sst	268	0.297718	Bursting-Vip	FS-Pvalb	461	0.495643
21	0.05	0.01	0.001	Bursting-Vip	Adapting-Npy	670	0.408284	Adapting-Vip	Adapting-Sst	697	0.916593	IB	Adapting-Sst	119	0.985179	Adapting-Vip	Adapting-Sst	681	0.791513	Bursting-Vip	Adapting-Sst	300	0.660111
