# Supplementary material for: Lactate is an energy substrate for rodent cortical neurons and enhances their firing activity
Source: eLife. 2021 Nov 12;10:e71424. doi: 10.7554/eLife.71424 (PMC8651295; doi:10.7554/eLife.71424)
Supplement: Source data 6. [file elife-71424-supp13.xls]

## Sheet: Feuil1
	*	**	***	A1 (mV)				D1 (ms)				A2 (mV)				D2 (ms)				Amp. Red.				Dur. Inc.
k \ a=	0.05	0.01	0.001	Comparison		U=	p=	Comparison		U=	p=	Comparison		U=	p=	Comparison		U=	p=	Comparison		U=	p=	Comparison		U=	p=
1	0.00238095	0.00047619	4.7619e-05	RS	FS-Pvalb	449	3.95993e-08	RS	FS-Pvalb	10.5	3.05828e-26	RS	IB	24	1.95646e-08	RS	FS-Pvalb	7.5	9.9009e-27	RS	Bursting-Vip	19	6.06508e-20	Adapting-Npy	FS-Pvalb	193.5	1.25058e-13
2	0.0025	0.0005	5e-05	Adapting-Vip	FS-Pvalb	491	1.4418e-06	Adapting-Npy	FS-Pvalb	48.5	6.2785e-21	RS	Bursting-Vip	278	9.4164e-08	Adapting-Npy	FS-Pvalb	31	2.42615e-22	Bursting-Vip	Adapting-Vip	29	2.86997e-18	RS	IB	0	3.21893e-12
3	0.00263158	0.000526316	5.26316e-05	Adapting-Sst	FS-Pvalb	145	2.11333e-06	RS	Adapting-Vip	387.5	1.578e-16	IB	Adapting-Vip	35	2.9803e-07	RS	Adapting-Vip	416	8.56837e-16	Bursting-Vip	Adapting-Npy	37	4.72839e-17	IB	Adapting-Vip	2	2.35272e-11
4	0.00277778	0.000555556	5.55556e-05	Adapting-Npy	FS-Pvalb	504	9.0184e-06	RS	Bursting-Vip	161.5	1.93868e-11	IB	Adapting-Npy	33	3.38306e-07	IB	FS-Pvalb	0	3.05777e-10	Bursting-Vip	FS-Pvalb	31	4.89672e-14	Bursting-Vip	FS-Pvalb	81.5	1.74307e-10
5	0.00294118	0.000588235	5.88235e-05	Bursting-Vip	FS-Pvalb	203	1.81929e-05	IB	FS-Pvalb	0	3.05777e-10	IB	Adapting-Sst	6	4.57568e-07	IB	Adapting-Vip	8.5	3.9408e-10	Bursting-Vip	Adapting-Sst	11	1.69867e-12	IB	FS-Pvalb	0	3.05777e-10
6	0.003125	0.000625	6.25e-05	IB	FS-Pvalb	50	0.000150857	RS	Adapting-Sst	208.5	2.28644e-08	Bursting-Vip	Adapting-Sst	84	1.34267e-06	RS	Adapting-Sst	220.5	5.27909e-08	RS	IB	0	3.21893e-12	RS	FS-Pvalb	394.5	2.59754e-09
7	0.00333333	0.000666667	6.66667e-05	Bursting-Vip	Adapting-Npy	492	0.00982264	RS	Adapting-Npy	841.5	4.16983e-07	RS	FS-Pvalb	539	1.87259e-06	Adapting-Vip	Adapting-Npy	726.5	8.045e-08	IB	Adapting-Vip	0	5.88179e-12	Adapting-Vip	FS-Pvalb	372.5	4.94115e-09
8	0.00357143	0.000714286	7.14286e-05	RS	Adapting-Npy	1364	0.0330779	Adapting-Vip	Adapting-Npy	800	9.4066e-07	Bursting-Vip	Adapting-Vip	346	1.43122e-05	IB	Adapting-Sst	3	1.06766e-07	IB	FS-Pvalb	0	3.05777e-10	IB	Adapting-Npy	15	6.23754e-09
9	0.00384615	0.000769231	7.69231e-05	Adapting-Sst	Adapting-Npy	477	0.0405682	IB	Adapting-Vip	43	1.07487e-06	Adapting-Sst	FS-Pvalb	171	1.76626e-05	Adapting-Vip	FS-Pvalb	450	2.39471e-07	IB	Adapting-Npy	8	6.3513e-10	IB	Adapting-Sst	0	1.52523e-08
10	0.00416667	0.000833333	8.33333e-05	Bursting-Vip	Adapting-Vip	618	0.0978462	Adapting-Vip	FS-Pvalb	486.5	1.1679e-06	Bursting-Vip	Adapting-Npy	330	1.84607e-05	IB	Adapting-Npy	32	2.8249e-07	IB	Adapting-Sst	0	1.52523e-08	Bursting-Vip	Adapting-Vip	242	3.99523e-08
11	0.00454545	0.000909091	9.09091e-05	IB	Bursting-Vip	91	0.138652	IB	Bursting-Vip	12.5	1.54451e-06	IB	FS-Pvalb	51	0.000172413	RS	Bursting-Vip	298.5	3.00875e-07	Adapting-Vip	FS-Pvalb	539	9.76726e-06	RS	Bursting-Vip	269	5.45681e-08
12	0.005	0.001	0.0001	RS	Bursting-Vip	684.5	0.144595	Adapting-Sst	FS-Pvalb	143	1.77278e-06	Adapting-Npy	FS-Pvalb	596	0.000244574	Adapting-Sst	FS-Pvalb	127	4.04751e-07	Adapting-Npy	FS-Pvalb	671	0.00223379	Adapting-Sst	FS-Pvalb	130	5.39305e-07
13	0.00555556	0.00111111	0.000111111	Adapting-Vip	Adapting-Sst	575	0.184517	Bursting-Vip	FS-Pvalb	198.5	1.28232e-05	Adapting-Vip	FS-Pvalb	640	0.00030338	Bursting-Vip	FS-Pvalb	160	6.79182e-07	RS	FS-Pvalb	776	0.00291561	Bursting-Vip	Adapting-Sst	98.5	6.76578e-06
14	0.00625	0.00125	0.000125	Adapting-Vip	Adapting-Npy	1442	0.242102	IB	Adapting-Sst	22.5	5.93313e-05	Adapting-Sst	Adapting-Npy	449	0.018759	IB	Bursting-Vip	14.5	2.83639e-06	RS	Adapting-Vip	1321	0.00565294	Bursting-Vip	Adapting-Npy	359	7.2973e-05
15	0.00714286	0.00142857	0.000142857	IB	Adapting-Sst	91	0.286578	Bursting-Vip	Adapting-Npy	358.5	6.97374e-05	RS	Adapting-Npy	1324	0.0189027	RS	Adapting-Npy	964.5	1.38497e-05	Adapting-Sst	FS-Pvalb	289	0.0153159	IB	Bursting-Vip	29	9.7333e-05
16	0.00833333	0.00166667	0.000166667	RS	IB	255	0.345101	IB	Adapting-Npy	97.5	0.00060442	IB	Bursting-Vip	76	0.0441333	RS	IB	116	0.000861132	Adapting-Vip	Adapting-Npy	1288	0.0416431	Adapting-Vip	Adapting-Npy	1046	0.00060799
17	0.01	0.002	0.0002	RS	Adapting-Sst	658	0.356893	Adapting-Sst	Adapting-Npy	424.5	0.00871518	Adapting-Vip	Adapting-Sst	543	0.0986956	Adapting-Sst	Adapting-Npy	403.5	0.00431081	Adapting-Vip	Adapting-Sst	554	0.123683	RS	Adapting-Npy	1252	0.00616154
18	0.0125	0.0025	0.00025	RS	Adapting-Vip	1783	0.701806	Adapting-Vip	Adapting-Sst	595.5	0.260433	Bursting-Vip	FS-Pvalb	404	0.149555	Bursting-Vip	Adapting-Npy	487.5	0.00847471	IB	Bursting-Vip	95	0.179699	Adapting-Sst	Adapting-Npy	505	0.0804092
19	0.0166667	0.00333333	0.000333333	IB	Adapting-Npy	263	0.77134	Bursting-Vip	Adapting-Sst	289	0.518257	RS	Adapting-Vip	1642.5	0.26952	Bursting-Vip	Adapting-Vip	652.5	0.181402	RS	Adapting-Sst	705	0.633717	Adapting-Vip	Adapting-Sst	586	0.223983
20	0.025	0.005	0.0005	IB	Adapting-Vip	283	0.84694	Bursting-Vip	Adapting-Vip	759	0.732219	Adapting-Vip	Adapting-Npy	1506	0.416994	Adapting-Vip	Adapting-Sst	587.5	0.227846	RS	Adapting-Npy	1678	0.65013	RS	Adapting-Sst	698.5	0.587381
21	0.05	0.01	0.001	Bursting-Vip	Adapting-Sst	321	0.962707	RS	IB	303.5	0.855833	RS	Adapting-Sst	690	0.536405	Bursting-Vip	Adapting-Sst	313	0.844298	Adapting-Sst	Adapting-Npy	660	0.904574	RS	Adapting-Vip	1756.5	0.602504
