# Supplementary material for: Lactate is an energy substrate for rodent cortical neurons and enhances their firing activity
Source: eLife. 2021 Nov 12;10:e71424. doi: 10.7554/eLife.71424 (PMC8651295; doi:10.7554/eLife.71424)
Supplement: Source data 7. [file elife-71424-supp14.xls]

## Sheet: Feuil1
	*	**	***	AHP1f (mV)				ADP1 (mV)				AHP1s (mV)				TAHP1f (ms)				TADP1 (ms)				TAHP1s (ms)				AHP2f (mV)				ADP2 (mV)				AHP2s (mV)				TAHP2f (ms)				TADP2 (ms)				TAHP2s (ms)
k \ a=	0.05	0.01	0.001	Comparison		U=	p=	Comparison		U=	p=	Comparison		U=	p=	Comparison		U=	p=	Comparison		U=	p=	Comparison		U=	p=	Comparison		U=	p=	Comparison		U=	p=	Comparison		U=	p=	Comparison		U=	p=	Comparison		U=	p=	Comparison
1	0.00238095	0.00047619	4.7619e-05	RS	FS-Pvalb	0	2.2002e-28	Adapting-Vip	Adapting-Npy	245	1.16651e-18	RS	Bursting-Vip	0	2.90612e-23	RS	Adapting-Vip	258	2.74527e-20	Adapting-Vip	FS-Pvalb	153	7.42196e-16	RS	FS-Pvalb	0	2.2002e-28	RS	FS-Pvalb	0	2.2002e-28	RS	Adapting-Vip	317	1.86165e-18	RS	FS-Pvalb	299	1.04019e-11	RS	Adapting-Vip	309	1.08091e-18	Adapting-Vip	FS-Pvalb	170	3.68132e-15	RS	FS-Pvalb
2	0.0025	0.0005	5e-05	RS	Adapting-Vip	302	6.67189e-19	Bursting-Vip	Adapting-Vip	84	2.36081e-14	Bursting-Vip	Adapting-Vip	48	1.13099e-16	RS	FS-Pvalb	109	1.02159e-18	Bursting-Vip	Adapting-Vip	99	1.50814e-13	RS	Adapting-Npy	140	7.55738e-24	RS	Adapting-Vip	189	9.41406e-23	Adapting-Vip	Adapting-Npy	270.5	7.66914e-18	RS	Bursting-Vip	182	1.15633e-10	RS	FS-Pvalb	116.5	2.27778e-18	Adapting-Vip	Adapting-Npy	381	1.13633e-14	RS	Adapting-Npy
3	0.00263158	0.000526316	5.26316e-05	Adapting-Vip	FS-Pvalb	118	1.95183e-17	RS	Adapting-Vip	486	3.76948e-14	RS	IB	0	3.21893e-12	RS	Bursting-Vip	41.5	7.51605e-18	Adapting-Vip	Adapting-Npy	507	9.59442e-12	RS	Bursting-Vip	0	2.90612e-23	RS	Adapting-Npy	357	2.13826e-16	Adapting-Vip	FS-Pvalb	326.5	3.59597e-10	RS	Adapting-Sst	146	1.55819e-10	Adapting-Npy	FS-Pvalb	153	3.3485e-15	RS	Adapting-Vip	477.5	2.36864e-14	Adapting-Vip	FS-Pvalb
4	0.00277778	0.000555556	5.55556e-05	RS	Adapting-Npy	331	4.06921e-17	Adapting-Vip	FS-Pvalb	266	7.50834e-12	IB	Adapting-Vip	15	3.87022e-09	Adapting-Npy	FS-Pvalb	185.5	6.29668e-14	IB	Adapting-Vip	25	4.43075e-08	Adapting-Vip	FS-Pvalb	102.5	3.05543e-18	Adapting-Vip	FS-Pvalb	167	2.79402e-15	RS	Adapting-Sst	254	4.71504e-07	IB	Adapting-Vip	9	5.70534e-10	Adapting-Vip	Adapting-Npy	368	5.2136e-15	Adapting-Sst	FS-Pvalb	151	3.54052e-06	RS	Adapting-Vip
5	0.00294118	0.000588235	5.88235e-05	Bursting-Vip	FS-Pvalb	10	1.91963e-16	IB	Adapting-Vip	25	4.43075e-08	Bursting-Vip	Adapting-Npy	197	4.96244e-09	Adapting-Vip	Adapting-Npy	418.5	9.5093e-14	RS	Adapting-Vip	1005	7.98122e-06	Bursting-Vip	Adapting-Vip	48	1.13099e-16	Bursting-Vip	FS-Pvalb	24	1.0134e-14	Adapting-Sst	Adapting-Npy	219	4.88164e-07	IB	Bursting-Vip	0	5.74168e-09	RS	Bursting-Vip	135	1.70723e-12	Adapting-Sst	Adapting-Npy	268	1.00473e-05	RS	Adapting-Sst
6	0.003125	0.000625	6.25e-05	Adapting-Npy	FS-Pvalb	186.5	6.86716e-14	Bursting-Vip	Adapting-Sst	103	1.15759e-05	RS	FS-Pvalb	478	1.4807e-07	Bursting-Vip	Adapting-Npy	95.5	2.94112e-13	Bursting-Vip	Adapting-Sst	108	1.94236e-05	RS	Adapting-Vip	454	7.02267e-15	RS	Bursting-Vip	132	1.2669e-12	IB	Adapting-Vip	74.5	4.72071e-05	IB	Adapting-Sst	0	1.52523e-08	RS	Adapting-Sst	119.5	1.12968e-11	RS	Adapting-Sst	313.5	1.23044e-05	IB	Adapting-Npy
7	0.00333333	0.000666667	6.66667e-05	IB	FS-Pvalb	0	3.05777e-10	Adapting-Sst	Adapting-Npy	283	2.29198e-05	Bursting-Vip	Adapting-Sst	88	2.17023e-06	RS	Adapting-Sst	104	2.23534e-12	Adapting-Sst	FS-Pvalb	178	2.98416e-05	RS	IB	0	3.21893e-12	Adapting-Npy	FS-Pvalb	239	4.76602e-12	Adapting-Sst	FS-Pvalb	212	0.00029731	RS	Adapting-Vip	814	2.93817e-08	Bursting-Vip	Adapting-Npy	192	3.36943e-09	IB	FS-Pvalb	69	0.00143229	IB	Adapting-Vip
8	0.00357143	0.000714286	7.14286e-05	RS	Adapting-Sst	157	4.14883e-10	Adapting-Sst	FS-Pvalb	221	0.000512957	RS	Adapting-Vip	992.5	5.68974e-06	Adapting-Sst	Adapting-Npy	188	5.31e-08	IB	Adapting-Sst	35	0.000766395	RS	Adapting-Sst	128	2.81462e-11	Adapting-Sst	FS-Pvalb	61	1.48999e-10	Bursting-Vip	Adapting-Vip	532.5	0.0133898	IB	FS-Pvalb	10	4.2503e-08	Adapting-Sst	Adapting-Npy	164	7.82115e-09	Bursting-Vip	Adapting-Vip	460.5	0.0014958	IB	FS-Pvalb
9	0.00384615	0.000769231	7.69231e-05	RS	Bursting-Vip	205	7.02637e-10	RS	Adapting-Sst	408.5	0.000760486	Adapting-Vip	FS-Pvalb	535.5	8.38916e-06	IB	Bursting-Vip	22	2.23351e-05	Adapting-Sst	Adapting-Npy	380	0.00186603	Adapting-Npy	FS-Pvalb	315	7.85197e-10	IB	FS-Pvalb	0	3.05777e-10	IB	Adapting-Npy	147.5	0.0161475	RS	IB	32	9.5924e-08	IB	FS-Pvalb	7	1.376e-08	RS	IB	137	0.00331302	RS	Bursting-Vip
10	0.00416667	0.000833333	8.33333e-05	Adapting-Sst	FS-Pvalb	75	1.09828e-09	IB	Adapting-Sst	35	0.000766395	RS	Adapting-Sst	331	2.96328e-05	IB	FS-Pvalb	43.5	5.58716e-05	RS	Bursting-Vip	531	0.0045187	Bursting-Vip	Adapting-Npy	185	1.93591e-09	RS	Adapting-Sst	197	1.02775e-08	IB	Adapting-Sst	58	0.0182523	IB	Adapting-Npy	30	1.94757e-07	IB	Adapting-Sst	2	6.1009e-08	IB	Adapting-Npy	123.5	0.00395374	Adapting-Npy	FS-Pvalb
11	0.00454545	0.000909091	9.09091e-05	IB	Adapting-Vip	39	5.78633e-07	RS	Bursting-Vip	536	0.00521581	IB	Adapting-Npy	70	5.03784e-05	IB	Adapting-Vip	100	0.000478495	Bursting-Vip	Adapting-Npy	495	0.010719	IB	Adapting-Vip	15	3.87022e-09	IB	Adapting-Vip	44	1.24716e-06	RS	Bursting-Vip	585	0.0189878	Adapting-Vip	FS-Pvalb	446	1.99298e-07	IB	Adapting-Vip	27	6.70877e-08	Bursting-Vip	FS-Pvalb	346	0.0259357	IB	Bursting-Vip
12	0.005	0.001	0.0001	IB	Adapting-Npy	41	1.27757e-06	Bursting-Vip	Adapting-Npy	498	0.011686	IB	Adapting-Sst	30	0.000312671	RS	Adapting-Npy	1136	0.000731709	RS	FS-Pvalb	859	0.0174898	Bursting-Vip	Adapting-Sst	85	1.51609e-06	IB	Adapting-Npy	75	8.408e-05	Bursting-Vip	Adapting-Npy	517.5	0.0197715	Adapting-Npy	FS-Pvalb	507	1.01559e-05	IB	Bursting-Vip	6	1.7225e-07	RS	Bursting-Vip	618	0.0405697	IB	Adapting-Sst
13	0.00555556	0.00111111	0.000111111	IB	Adapting-Sst	19	2.89793e-05	Adapting-Vip	Adapting-Sst	464.5	0.0137473	Adapting-Npy	FS-Pvalb	609	0.000369451	RS	IB	120.5	0.00113218	RS	IB	185	0.036355	Adapting-Sst	FS-Pvalb	150	3.25246e-06	IB	Bursting-Vip	29	9.7333e-05	RS	IB	184.5	0.0348664	Bursting-Vip	Adapting-Npy	396.5	0.000354921	IB	Adapting-Npy	79.5	0.000124293	Bursting-Vip	Adapting-Npy	547.5	0.0421885	Adapting-Sst	FS-Pvalb
14	0.00625	0.00125	0.000125	IB	Bursting-Vip	24	3.48979e-05	RS	IB	185	0.036355	Adapting-Sst	FS-Pvalb	288	0.0146926	IB	Adapting-Sst	44	0.0031196	IB	Adapting-Npy	170	0.0491444	IB	Adapting-Npy	65	2.93255e-05	IB	Adapting-Sst	42	0.00233126	Bursting-Vip	FS-Pvalb	365.5	0.0490991	Adapting-Vip	Adapting-Sst	402	0.00181569	RS	Adapting-Npy	1139	0.000777251	Bursting-Vip	Adapting-Sst	226	0.0654531	RS	IB
15	0.00714286	0.00142857	0.000142857	Bursting-Vip	Adapting-Vip	518	0.00909909	IB	Adapting-Npy	170	0.0491444	Adapting-Sst	Adapting-Npy	474	0.0375098	Adapting-Sst	FS-Pvalb	275	0.00838044	RS	Adapting-Sst	556	0.0577944	IB	Adapting-Sst	30	0.000312671	Adapting-Vip	Adapting-Sst	516	0.0540131	Adapting-Vip	Adapting-Sst	517	0.0553027	Bursting-Vip	Adapting-Vip	469.5	0.0020246	Adapting-Vip	FS-Pvalb	727	0.00332686	IB	Bursting-Vip	107.5	0.352784	Adapting-Vip	Adapting-Npy
16	0.00833333	0.00166667	0.000166667	Bursting-Vip	Adapting-Npy	560	0.0570575	RS	FS-Pvalb	1009	0.189634	Adapting-Vip	Adapting-Npy	1318	0.0618583	Adapting-Vip	FS-Pvalb	788.5	0.0135075	Adapting-Npy	FS-Pvalb	819.5	0.0593593	Adapting-Vip	Adapting-Npy	1020	0.000343039	Bursting-Vip	Adapting-Vip	631.5	0.125226	IB	FS-Pvalb	116.5	0.0613467	Adapting-Sst	Adapting-Npy	386	0.00233763	Adapting-Sst	FS-Pvalb	269.5	0.00637943	IB	Adapting-Vip	242	0.376391	Bursting-Vip	FS-Pvalb
17	0.01	0.002	0.0002	Bursting-Vip	Adapting-Sst	251	0.172735	Bursting-Vip	FS-Pvalb	423	0.235299	Adapting-Vip	Adapting-Sst	541	0.0946124	Bursting-Vip	Adapting-Sst	234	0.0913697	Adapting-Vip	Adapting-Sst	563.5	0.147532	Adapting-Vip	Adapting-Sst	564	0.150383	Adapting-Sst	Adapting-Npy	559	0.239356	Bursting-Vip	Adapting-Sst	287	0.494236	Adapting-Sst	FS-Pvalb	272	0.00731986	Bursting-Vip	FS-Pvalb	319.5	0.00932355	Adapting-Vip	Adapting-Sst	623	0.398568	Bursting-Vip	Adapting-Vip
18	0.0125	0.0025	0.00025	Adapting-Vip	Adapting-Sst	633	0.456875	RS	Adapting-Npy	1553	0.263484	Bursting-Vip	FS-Pvalb	406	0.15728	IB	Adapting-Npy	201.5	0.162696	Bursting-Vip	FS-Pvalb	428	0.262672	Bursting-Vip	FS-Pvalb	415	0.195757	Adapting-Vip	Adapting-Npy	1458	0.280086	IB	Bursting-Vip	128.5	0.826929	RS	Adapting-Npy	1304	0.0140525	RS	IB	246.5	0.276335	RS	FS-Pvalb	1107	0.532135	Adapting-Sst	Adapting-Npy
19	0.0166667	0.00333333	0.000333333	Adapting-Vip	Adapting-Npy	1524	0.477026	IB	FS-Pvalb	150	0.321254	RS	Adapting-Npy	1549	0.254489	Bursting-Vip	FS-Pvalb	414	0.191174	RS	Adapting-Npy	1559.5	0.27738	IB	FS-Pvalb	145	0.263123	RS	IB	255	0.345101	RS	Adapting-Npy	1732	0.867314	Adapting-Vip	Adapting-Npy	1312.5	0.0572724	Adapting-Vip	Adapting-Sst	660	0.6355	Adapting-Npy	FS-Pvalb	1003.5	0.642697	Adapting-Vip	Adapting-Sst
20	0.025	0.005	0.0005	RS	IB	301	0.831099	Adapting-Npy	FS-Pvalb	954	0.400701	IB	FS-Pvalb	145	0.263123	Bursting-Vip	Adapting-Vip	700.5	0.373962	IB	FS-Pvalb	150	0.321254	Adapting-Sst	Adapting-Npy	578	0.328625	Bursting-Vip	Adapting-Sst	277	0.38341	RS	FS-Pvalb	1185	0.936058	Bursting-Vip	FS-Pvalb	393	0.112073	Bursting-Vip	Adapting-Vip	764	0.767294	IB	Adapting-Sst	113.5	0.809114	Bursting-Vip	Adapting-Sst
21	0.05	0.01	0.001	Adapting-Sst	Adapting-Npy	653.5	0.847061	IB	Bursting-Vip	130	0.879702	IB	Bursting-Vip	130	0.879702	Adapting-Vip	Adapting-Sst	623	0.398568	IB	Bursting-Vip	130	0.879702	IB	Bursting-Vip	130	0.879702	Bursting-Vip	Adapting-Npy	714	0.68848	Adapting-Npy	FS-Pvalb	1058.5	0.966371	Bursting-Vip	Adapting-Sst	297	0.619911	Bursting-Vip	Adapting-Sst	319.5	0.932927	RS	Adapting-Npy	1726	0.842343	Bursting-Vip	Adapting-Npy
[truncated: 2 more columns]
