# Supplementary material for: Lactate is an energy substrate for rodent cortical neurons and enhances their firing activity
Source: eLife journal article supplement (doi:10.7554/elife.71424), 2021-11-11
Supplement: supp [file elife_poa_e71424_Figure_6_source_data_3.xls]

## Sheet: Feuil1
	Mean 2.5 Glc	Mean 2.5 Glc + 15 Pyr
cell #	Normalized frequency	Normalized frequency
AK385	1	12.7778
AK388	1	1.35401
AK391	1	1.45313
AK392	1	6.61538
AK394	1	0.972125
AK452	1	4.27297
Mean	1	4.57423
s.e.m.	0	2.04589
Shapiro-Wilk	N/A	0.82947
p=	0	0.10638
		*	**	***	Normalized Frequency
	k \ a=	0.05	0.01	0.001	Comparison		NLact=	NPyr=	U=	P=
	1	0.05	0.01	0.001	15 Lact.	15 Pyr	16	6	43	0.746814
cell #	Carboxylate	Normalized frequency
AK319	Lactate	1.90133
AK320	Lactate	2.62525
AK323	Lactate	1.50301
AK324	Lactate	1.4571
AK325	Lactate	0.95913
AK333	Lactate	1.1929
AK359	Lactate	1.64861
AK360	Lactate	1.9635
AK364	Lactate	4.75797
AK368	Lactate	11.5116
AK370	Lactate	1.66832
AK374	Lactate	1.06861
AK375	Lactate	1.22979
AK376	Lactate	2.71278
AK378	Lactate	1.68927
AK383	Lactate	6.05477
	Mean	2.7465
	s.e.m.	0.701046
AK385	Pyruvate	12.7778
AK388	Pyruvate	1.35401
AK391	Pyruvate	1.45313
AK392	Pyruvate	6.61538
AK394	Pyruvate	0.972125
AK452	Pyruvate	4.27297
	Mean	4.57423
	s.e.m.	2.04589
