# Supplementary material for: Lactate is an energy substrate for rodent cortical neurons and enhances their firing activity
Source: eLife journal article supplement (doi:10.7554/elife.71424), 2021-11-11
Supplement: supp [file elife_poa_e71424_Figure_6_source_data_4.xls]

## Sheet: Feuil1
Cell Id	Metabolite	Mean before -5-0 min (%)	Mean during last 5 min (%)
ALS005-Pyramid 1	Lact.	1.11918e-18	-0.0534796
ALS005-Interneuron 1	Lact.	3.68769e-17	-0.0563769
ALS005-Pyramid 2	Lact.	5.4392e-17	-0.0536762
ALS006-Pyramid 1	Lact.	0	-0.0748533
ALS006-Pyramid 2	Lact.	1.05203e-17	-0.0710949
ALS006-Interneuron 1	Lact.	2.57411e-17	-0.0698291
ALS008-Pyramid 1	Lact.	1.43255e-17	-0.0416083
ALS008-Pyramid 2	Lact.	6.71506e-18	-0.0433187
ALS008-Interneuron 1	Lact.	-5.73018e-17	-0.0415178
ALS008-Pyramid 3	Lact.	-5.73018e-17	-0.0415178
ALS008-Pyramid 4	Lact.	4.38717e-17	-0.0463251
ALS008-Interneuron 2	Lact.	9.80399e-17	-0.0448622
ALS009-Pyramid 1	Lact.	1.11918e-19	-0.0170144
ALS009-Pyramid 2	Lact.	-8.65683e-17	-0.00982444
ALS009-Pyramid 3	Lact.	5.35106e-17	-0.0110875
ALS009-Pyramid 4	Lact.	-7.71113e-17	-0.00648949
ALS009-Interneuron 1	Lact.	-7.91258e-17	0.00306934
ALS009-Interneuron 2	Lact.	-7.79506e-17	-0.0164517
ALS010-Pyramid 1	Lact.	5.59588e-20	0.0209692
ALS010-Pyramid 2	Lact.	-1.30944e-17	0.0264419
ALS010-Interneuron 1	Lact.	-7.71672e-17	0.0260502
ALS012-Pyramid 1	Lact.	-6.44646e-17	0.0415983
ALS012-Pyramid 2	Lact.	-3.98427e-17	0.0441273
ALS012-Interneuron 1	Lact.	-4.87961e-17	0.0381419
ALS012-Pyramid 3	Lact.	-4.38717e-17	0.0381879
ALS012-Interneuron 2	Lact.	4.11857e-17	0.0460703
ALS012-Interneuron 3	Lact.	-3.71567e-17	0.0409388
ALS013-Interneuron 1	Lact.	5.94283e-17	0.033294
ALS013-Pyramid 1	Lact.	2.39504e-17	0.0316394
ALS013-Interneuron 2	Lact.	-8.27071e-17	0.0354858
ALS013-Interneuron 3	Lact.	3.15608e-17	0.0272725
ALS013-Pyramid 2	Lact.	8.27071e-17	0.0372184
ALS051-Pyramid 1	Lact.	-3.50302e-17	0.0236225
ALS051-Pyramid 2	Lact.	-2.99939e-17	0.0246071
ALS051-Pyramid 3	Lact.	-2.07048e-17	0.0235789
ALS051-Pyramid 4	Lact.	-2.07048e-17	0.0235789
ALS051-Pyramid 5	Lact.	-8.61766e-18	0.0284343
ALS051-Pyramid 6	Lact.	1.99213e-17	0.020328
ALS051-Interneuron 1	Lact.	-5.3049e-17	0.0205236
ALS051-Interneuron 2	Lact.	3.86116e-17	0.030418
ALS052-Pyramid 1	Lact.	-3.57017e-17	0.0200506
ALS052-Internenruon 1	Lact.	-2.76437e-17	0.014707
ALS052-Pyramid 2	Lact.	8.08045e-17	0.0181507
ALS052-Interneuron 2	Lact.	6.91651e-17	0.0170765
ALS052-Pyramid 3	Lact.	1.58923e-17	0.021715
ALS052-Interneuron 3	Lact.	-5.36086e-17	0.0208912
ALS053-Pyramid 1	Lact.	5.15101e-17	0.0166819
ALS053-Pyramid 2	Lact.	-6.26739e-17	0.0171429
ALS053-Interneuron 1	Lact.	3.56737e-17	0.0251132
ALS053-Interneuron 2	Lact.	-5.69381e-17	0.0236499
ALS053-Pyramid 3	Lact.	3.42748e-17	0.0184217
ALS053-Interneuron 3	Lact.	3.37991e-17	0.0239297
ALS053-Pyramid 4	Lact.	8.58968e-17	0.0230402
ALS054-Pyramid 1	Lact.	5.59588e-18	0.0184369
ALS054-Pyramid 2	Lact.	-2.42302e-17	0.0105826
ALS054-Interneuron 1	Lact.	2.36146e-17	0.0217947
ALS054-Pyramid 3	Lact.	9.90471e-18	0.0184329
ALS054-Pyramid 4	Lact.	3.6653e-17	0.0148163
ALS054-Pyramid 5	Lact.	-1.19752e-17	0.0158947
ALS054-Pyramid 6	Lact.	-4.02904e-17	0.0164342
ALS054-Pyramid 7	Lact.	-4.25287e-18	0.00625437
	Mean	-3.31877e-18	0.00605715
	s.e.m.	6.21116e-18	0.00422324
	Shapiro-Wilk	N/A	0.825
	p=	0	0
Cell Id	Metabolite	Mean before -5-0 min (%)	Mean during last 5 min (%)
ALS020-Pyramid 1	Pyr.	6.96128e-17	-0.143812
ALS020-Pyramid 2	Pyr.	5.52873e-17	-0.141352
ALS020-Pyramid 3	Pyr.	5.55112e-17	-0.14754
ALS020-Pyramid 4	Pyr.	-8.1476e-17	-0.13961
ALS020-Interneuron 1	Pyr.	3.35753e-18	-0.146404
ALS021-Pyramid 1	Pyr.	5.32728e-17	-0.111281
ALS021-Interneuron 1	Pyr.	3.54779e-17	-0.116203
ALS021-Pyramid 2	Pyr.	2.22716e-17	-0.128579
ALS021-Pyramid 3	Pyr.	1.39897e-17	-0.109482
ALS021-Pyramid 4	Pyr.	1.39897e-17	-0.109482
ALS021-Interneuron 2	Pyr.	-1.43255e-17	-0.122864
ALS021-Pyramid 5	Pyr.	-8.88626e-17	-0.110247
ALS023-Pyramid 1	Pyr.	-7.6104e-17	-0.0422404
ALS023-Pyramid 2	Pyr.	3.42468e-17	-0.0506542
ALS023-Pyramid 3	Pyr.	1.74592e-17	-0.046894
ALS023-Interneuron 1	Pyr.	1.0856e-17	-0.0513196
ALS023-Interneuron 2	Pyr.	2.9882e-17	-0.0561542
ALS023-Pyramid 4	Pyr.	4.14095e-18	-0.0533567
ALS023-Interneuron 3	Pyr.	-6.96128e-17	-0.0462487
ALS023-Interneuron 4	Pyr.	5.37205e-18	-0.0533282
ALS023-Pyramid 5	Pyr.	-1.91379e-17	-0.0493715
ALS024-Pyramid 1	Pyr.	3.91712e-17	-0.107876
ALS024-Pyramid 2	Pyr.	3.55898e-17	-0.105004
ALS024-Pyramid 3	Pyr.	-7.09558e-17	-0.0994972
ALS024-Pyramid 4	Pyr.	-5.37205e-17	-0.10335
ALS024-Pyramid 5	Pyr.	-4.05142e-17	-0.095257
ALS024-Interneuron 1	Pyr.	4.79008e-17	-0.113401
ALS025-Pyramid 1	Pyr.	3.41349e-17	-0.13874
ALS025-Pyramid 2	Pyr.	-4.80127e-17	-0.143237
ALS025-Pyramid 3	Pyr.	2.79794e-17	-0.139082
ALS025-Interneuron 1	Pyr.	-2.29431e-17	-0.129741
ALS025-Interneuron 2	Pyr.	3.21204e-17	-0.1433
ALS025-Pyramid 4	Pyr.	1.54446e-17	-0.14183
ALS025-Interneuron 4	Pyr.	3.71567e-17	-0.138993
ALS025-Pyramid 5	Pyr.	-4.95795e-17	-0.256972
ALS031-Pyramid 1	Pyr.	-4.95795e-17	-0.256972
ALS031-Pyramid 2	Pyr.	1.67876e-19	-0.254968
ALS031-Pyramid 3	Pyr.	1.634e-17	-0.247839
ALS031-Pyramid 4	Pyr.	-2.84306e-17	-0.239358
ALS055-Inteneuron 1	Pyr.	3.17846e-17	-0.0675129
ALS055-Pyramid 1	Pyr.	-1.32622e-17	-0.0677134
ALS055-Interneuron 2	Pyr.	-8.20356e-17	-0.0709011
ALS055-Pyramid 2	Pyr.	-8.39942e-17	-0.066869
ALS055-Pyramid 3	Pyr.	-7.63838e-17	-0.0630463
	Mean	-5.14575e-18	-0.117452
	s.e.m.	7.053e-18	0.00907046
	Shapiro-Wilk	N/A	0.86777
	p=	0	0.00013
Cell Id	Metabolite	Mean before -5-0 min (%)	Mean during last 5 min (%)
ALS015-Pyramid 1	Ctrl	6.15547e-18	-0.0898401
ALS015-Pyramid 2	Ctrl	5.21536e-17	-0.089157
ALS015-Interneuron 1	Ctrl	-7.49848e-18	-0.0929679
ALS015-Interneuron 2	Ctrl	-2.76437e-17	-0.0854287
ALS016-Pyramid 1	Ctrl	-1.11918e-19	-0.121382
ALS016-Pyramid 2	Ctrl	3.16727e-17	-0.121067
ALS016-Pyramid 3	Ctrl	-5.23775e-17	-0.112627
ALS016-Interneuron 1	Ctrl	1.05426e-16	-0.110226
ALS017-Interneuron 1	Ctrl	2.28312e-17	-0.17554
ALS017-Pyramid 1	Ctrl	2.28312e-17	-0.17554
ALS017-Interneuron 2	Ctrl	2.84271e-17	-0.179011
ALS017-Interneuron 3	Ctrl	1.23109e-17	-0.184151
ALS017-Pyramid 2	Ctrl	-4.40956e-17	-0.176964
ALS018-(Interneuron 1	Ctrl	-5.05868e-17	-0.05927
ALS018-(Pyramid 1	Ctrl	-5.77495e-17	-0.0608772
ALS018-(Pyramid 2	Ctrl	1.72353e-17	-0.0547818
ALS018-(Pyramid 3	Ctrl	-8.30429e-17	-0.0547511
ALS018-(Interneuron 2	Ctrl	2.52934e-17	-0.0434079
ALS019-Pyramid 1	Ctrl	-8.1476e-17	-0.0915171
ALS019-Interneuron 1	Ctrl	5.5735e-17	-0.0867596
ALS019-Pyramid 2	Ctrl	-7.29703e-17	-0.103384
ALS019-Interneuron 2	Ctrl	-2.01452e-17	-0.0762297
ALS019-Pyramid 3	Ctrl	-7.38656e-18	-0.0851177
ALS034-Interneuron 1	Ctrl	-3.31276e-17	-0.0683331
ALS034-Pyramid 1	Ctrl	-4.24168e-17	-0.06951
ALS034-Pyramid 2	Ctrl	-2.18239e-17	-0.0712201
ALS034-Pyramid 3	Ctrl	-6.71506e-17	-0.0712639
ALS034-Pyramid 4	Ctrl	-5.99879e-17	-0.0673101
ALS034-Pyramid 5	Ctrl	-2.04809e-17	-0.0672898
ALS034-Pyramid 6	Ctrl	-5.26013e-18	-0.0678522
ALS034-Pyramid 7	Ctrl	5.7078e-18	-0.0715569
ALS034-Interneuron 2	Ctrl	-5.37205e-18	-0.0680468
ALS034-Pyramid 8	Ctrl	2.82032e-17	-0.0679003
ALS035-Interneuron 1	Ctrl	-7.67755e-17	-0.0732039
ALS035-Pyramid 1	Ctrl	6.49122e-18	-0.070494
ALS035-Pyramid 2	Ctrl	6.49122e-18	-0.070494
ALS035-Interneuron 2	Ctrl	6.35692e-17	-0.0733785
ALS035-Interneuron 3	Ctrl	-7.31941e-17	-0.0749522
ALS035-Pyramid 3	Ctrl	5.81972e-18	-0.0710012
ALS035-Internneuron 4	Ctrl	-1.99213e-17	-0.0674375
ALS035-Interneuron 5	Ctrl	6.40169e-17	-0.0689623
ALS039-Pyramid 1	Ctrl	1.02517e-16	-0.0542572
ALS039-Interneuron 1	Ctrl	5.7078e-17	-0.0546099
ALS039-Interneuron 2	Ctrl	7.83424e-17	-0.0556682
ALS039-Pyramid 2	Ctrl	-2.14882e-17	-0.0559761
ALS039-Interneuron 4	Ctrl	-4.09619e-17	-0.0549037
ALS039-Interneuron 5	Ctrl	4.87961e-17	-0.0527248
ALS041-Interneuron 1	Ctrl	-4.53266e-18	-0.0485927
ALS041-Pyramid 1	Ctrl	6.09392e-17	-0.0485976
ALS041-Pyramid 2	Ctrl	7.16273e-18	-0.0499551
ALS041-Pyramid 3	Ctrl	-7.55444e-18	-0.0504331
ALS041-Pyramid 4	Ctrl	-2.60209e-17	-0.0515519
ALS041-Interneuron 2	Ctrl	-8.77994e-17	-0.0508623
ALS041-Intenruon 3	Ctrl	3.90593e-17	-0.0447171
ALS041-Pyramid 5	Ctrl	-1.91379e-17	-0.0496036
ALS042-Pyramid 1	Ctrl	4.02344e-17	-0.0367841
ALS042-Pyramid 2	Ctrl	-2.69162e-17	-0.0376797
ALS042-Pyramid 3	Ctrl	-1.98934e-17	-0.0337555
ALS042-Interneuron 1	Ctrl	-2.69722e-17	-0.030436
ALS047-Pyramid 1	Ctrl	-2.01452e-18	-0.0652908
ALS047-Interneuron 1	Ctrl	-3.21204e-17	-0.0609065
ALS047-Pyramid 2	Ctrl	7.0732e-17	-0.0677292
ALS047-Interneuron 2	Ctrl	3.87235e-17	-0.0647347
ALS048-Pyramid 1	Ctrl	-2.73079e-17	-0.0941496
ALS048-Pyramid 2	Ctrl	5.50635e-17	-0.103077
ALS048-Pyramid 3	Ctrl	7.56563e-17	-0.102648
ALS048-Interneuron 1	Ctrl	3.13369e-17	-0.0997809
	Mean	-1.08994e-19	-0.0777557
	s.e.m.	5.75692e-18	0.00434056
	Shapiro-Wilk	N/A	0.81826
	p=	0	0
	*	**	***	Mean during last 5 min
K \ a=	0.05	0.01	0.001	Comparison		U=	P=
1	0.0166667	0.00333333	0.000333333	Glc	Lact	196	3.05998e-24
2	0.025	0.005	0.0005	Lact.	Pyr.	70	7.48944e-23
3	0.05	0.01	0.001	Glc	Pyr.	868	0.000208254
