# Supplementary material for: Lactate is an energy substrate for rodent cortical neurons and enhances their firing activity
Source: eLife journal article supplement (doi:10.7554/elife.71424), 2021-11-11
Supplement: supp [file elife_poa_e71424_Figure_6_source_data_5.xls]

## Sheet: Feuil1
Slice	Cells	Cell Id	Cell Id	Mean CTRL (%)	Mean IAA (%)	Mean IAA + KCN (%)
ALS239	Cell 1	ALS239-Cell 1	ALS239-Cell 1	-0.00332953	-0.0271643	-0.582784
	Cell 2	ALS239-Cell 2	ALS239-Cell 2	-0.0027758	-0.0234488	-0.577766
	Cell 3	ALS239-Cell 3	ALS239-Cell 3	-0.00307723	-0.0249845	-0.588459
	Cell 4	ALS239-Cell 4	ALS239-Cell 4	-0.0038825	-0.0248671	-0.587487
	Cell 5	ALS239-Cell 5	ALS239-Cell 5	-0.00251243	-0.024254	-0.589678
	Cell 6	ALS239-Cell 6	ALS239-Cell 6	-0.00297858	-0.0239171	-0.581412
	Cell 7	ALS239-Cell 7	ALS239-Cell 7	-0.0022844	-0.0235303	-0.581909
	Cell 8	ALS239-Cell 8	ALS239-Cell 8	-0.00156746	-0.0179128	-0.57752
	Cell 9	ALS239-Cell 9	ALS239-Cell 9	-0.00260635	-0.0245746	-0.58162
	Cell 10	ALS239-Cell 10	ALS239-Cell 10	-0.00254455	-0.0220644	-0.588425
ALS240	Cell 1	ALS240-Cell 1	ALS240-Cell 1	0.00103914	-0.0133475	-0.554475
	Cell 2	ALS240-Cell 2	ALS240-Cell 2	0.00104518	-0.0124931	-0.561261
	Cell 3	ALS240-Cell 3	ALS240-Cell 3	0.00189105	-0.0100317	-0.554244
	Cell 4	ALS240-Cell 4	ALS240-Cell 4	0.00164486	-0.00959266	-0.565754
	Cell 5	ALS240-Cell 5	ALS240-Cell 5	0.00227037	-0.0077308	-0.564629
	Cell 6	ALS240-Cell 6	ALS240-Cell 6	0.0026357	-0.00320757	-0.562711
	Cell 7	ALS240-Cell 7	ALS240-Cell 7	0.0033992	-0.00034634	-0.543206
ALS241	Cell 1	ALS241-Cell 1	ALS241-Cell 1	-0.00411971	-0.0210636	-0.546412
	Cell 2	ALS241-Cell 2	ALS241-Cell 2	-0.00289157	-0.0252252	-0.586667
	Cell 3	ALS241-Cell 3	ALS241-Cell 3	-0.00731729	-0.0195308	-0.58127
	Cell 4	ALS241-Cell 4	ALS241-Cell 4	-0.00620883	-0.0187017	-0.567604
	Cell 5	ALS241-Cell 5	ALS241-Cell 5	-0.00451525	-0.0208826	-0.579293
	Cell 6	ALS241-Cell 6	ALS241-Cell 6	-0.00435152	-0.0194317	-0.554175
	Cell 7	ALS241-Cell 7	ALS241-Cell 7	-0.00126146	-0.0216431	-0.579211
	Cell 8	ALS241-Cell 8	ALS241-Cell 8	-0.0020176	-0.015662	-0.550037
	Cell 9	ALS241-Cell 9	ALS241-Cell 9	-0.00458836	-0.0192341	-0.567829
	Cell 10	ALS241-Cell 10	ALS241-Cell 10	-0.0058307	-0.0190552	-0.566943
ALS243	Cell 1	ALS243-Cell 1	ALS243-Cell 1	-0.000672007	-0.0322261	-0.534073
	Cell 2	ALS243-Cell 2	ALS243-Cell 2	0.00184057	-0.0162631	-0.51564
	Cell 3	ALS243-Cell 3	ALS243-Cell 3	-0.000847442	-0.0324012	-0.530649
	Cell 4	ALS243-Cell 4	ALS243-Cell 4	-0.00131045	-0.0336291	-0.516506
	Cell 5	ALS243-Cell 5	ALS243-Cell 5	-0.000278203	-0.0296344	-0.515364
	Cell 6	ALS243-Cell 6	ALS243-Cell 6	-0.000622987	-0.0299179	-0.5146
	Cell 7	ALS243-Cell 7	ALS243-Cell 7	0.00304356	-0.0130813	-0.43681
	Cell 8	ALS243-Cell 8	ALS243-Cell 8	0.00135692	-0.0186843	-0.50281
	Cell 9	ALS243-Cell 9	ALS243-Cell 9	0.00358924	-0.00476546	-0.423849
	Cell 10	ALS243-Cell 10	ALS243-Cell 10	0.0037236	-0.0101993	-0.479642
ALS244	Cell 1	ALS244-Cell 1	ALS244-Cell 1	-0.0115436	-0.055695	-0.542086
	Cell 2	ALS244-Cell 2	ALS244-Cell 2	-0.0120171	-0.0519674	-0.569139
	Cell 3	ALS244-Cell 3	ALS244-Cell 3	-0.0107025	-0.0479539	-0.52078
	Cell 4	ALS244-Cell 4	ALS244-Cell 4	-0.0100854	-0.0475267	-0.517823
	Cell 5	ALS244-Cell 5	ALS244-Cell 5	-0.00933824	-0.0475115	-0.529154
	Cell 6	ALS244-Cell 6	ALS244-Cell 6	-0.00785087	-0.0376778	-0.483711
	Cell 7	ALS244-Cell 7	ALS244-Cell 7	-0.010654	-0.0504484	-0.528197
	Cell 8	ALS244-Cell 8	ALS244-Cell 8	-0.00948878	-0.0433609	-0.486772
	Cell 9	ALS244-Cell 9	ALS244-Cell 9	-0.00811706	-0.0400984	-0.467121
	Cell 10	ALS244-Cell 10	ALS244-Cell 10	-0.0101605	-0.0519945	-0.500781
ALS245	Cell 1	ALS245-Cell 1	ALS245-Cell 1	0.00173711	-0.0350216	-0.513084
	Cell 2	ALS245-Cell 2	ALS245-Cell 2	-0.000316261	-0.0349339	-0.468342
	Cell 3	ALS245-Cell 3	ALS245-Cell 3	0.000398111	-0.0311229	-0.408759
	Cell 4	ALS245-Cell 4	ALS245-Cell 4	0.00401253	-0.0289155	-0.44012
	Cell 5	ALS245-Cell 5	ALS245-Cell 5	0.000786728	-0.0324877	-0.479917
	Cell 6	ALS245-Cell 6	ALS245-Cell 6	0.00186284	-0.030082	-0.442083
	Cell 7	ALS245-Cell 7	ALS245-Cell 7	-0.00246417	-0.0431923	-0.564677
	Cell 8	ALS245-Cell 8	ALS245-Cell 8	0.000803711	-0.0352335	-0.4626
	Cell 9	ALS245-Cell 9	ALS245-Cell 9	-0.000244822	-0.036541	-0.47963
	Cell 10	ALS245-Cell 10	ALS245-Cell 10	-8.31238e-05	-0.0350267	-0.444788
	Cell 11	ALS245-Cell 11	ALS245-Cell 11	-7.47885e-05	-0.0364414	-0.477995
ALS247	Cell 1	ALS247-Cell 1	ALS247-Cell 1	-0.00890452	-0.0450686	-0.545946
	Cell 2	ALS247-Cell 2	ALS247-Cell 2	-0.0107282	-0.0471578	-0.495784
	Cell 3	ALS247-Cell 3	ALS247-Cell 3	-0.00848748	-0.0297946	-0.485348
	Cell 4	ALS247-Cell 4	ALS247-Cell 4	-0.0092657	-0.0377919	-0.492663
	Cell 5	ALS247-Cell 5	ALS247-Cell 5	-0.00797514	-0.0343532	-0.484918
	Cell 6	ALS247-Cell 6	ALS247-Cell 6	-0.00942674	-0.0386197	-0.467633
	Cell 7	ALS247-Cell 7	ALS247-Cell 7	-0.00822901	-0.0337055	-0.467528
	Cell 8	ALS247-Cell 8	ALS247-Cell 8	-0.00921831	-0.0380404	-0.516495
	Cell 9	ALS247-Cell 9	ALS247-Cell 9	-0.0103271	-0.0396056	-0.513402
	Cell 10	ALS247-Cell 10	ALS247-Cell 10	-0.00909527	-0.0400707	-0.462666
	Cell 11	ALS247-Cell 11	ALS247-Cell 11	-0.00963008	-0.037148	-0.491399
	Cell 12	ALS247-Cell 12	ALS247-Cell 12	-0.00900397	-0.0405335	-0.492944
	Cell 13	ALS247-Cell 13	ALS247-Cell 13	-0.00962112	-0.0426816	-0.51281
N (slices)	N (cells)		Mean	-0.00366712	-0.0291902	-0.523237
7	71		s.e.m.	0.000567433	0.00153596	0.00572816
			Shapiro-Wilk	0.92927	0.98777	0.9461
			p=	0.00063	0.72315	0.00421
					Friedman's ANOVA	Mean DR/R0
					Chi² ANOVA (N = 71, df = 2) =	142
					p<	0
		*	**	***	Mean Dlta R/R0
k \ a=		0.05	0.01	0.001	Comparison		T=	P=
1		0.0166667	0.00333333	0.000333333	Ctrl	IAA	0	2.43543e-13
2		0.025	0.005	0.0005	Ctrl	KCN	0	2.43543e-13
3		0.05	0.01	0.001	KCN	IAA	0	2.43543e-13
